# Supplementary material for: ArsR Family Regulator MSMEG_6762 Mediates the Programmed Cell Death by Regulating the Expression of HNH Nuclease in Mycobacteria
Source: MDPI journal article supplement (doi:10.3390/microorganisms10081535), 2022-07-29
Supplement: s1 [file s1]

|                     | Description <sup>a</sup>                                                             | Source of ref.            |
|---------------------|--------------------------------------------------------------------------------------|---------------------------|
| Plasmids            |                                                                                      |                           |
| pALACE              | <i>E. coli</i> – <i>Mycobacteria</i> shuttle vector; Hyg <sup>R</sup>                | (Du et al. 2014)          |
| pNIT                | <i>E. coli</i> – <i>Mycobacteria</i> shuttle vector; Kan <sup>R</sup>                | (Pandey et al. 2009)      |
| pJV53               | Expression of Che9c gp61; Kan <sup>R</sup>                                           | (Kessel and Hatfull 2008) |
| pAL-75              | Providing hygromycin resistance cassette                                             | (Kessel and Hatfull 2008) |
| pALACE-6762         | Expression vector for <i>MSMEG_6762</i> ; Hyg <sup>R</sup>                           | This study                |
| pALACE-5583         | Expression vector for <i>MSMEG_5583</i> ; Hyg <sup>R</sup>                           | This study                |
| pALACE-5876         | Expression vector for <i>MSMEG_5876</i> ; Hyg <sup>R</sup>                           | This study                |
| pALACE-3404         | Expression vector for <i>MSMEG_3404</i> ; Hyg <sup>R</sup>                           | This study                |
| pALACE-1275         | Expression vector for <i>MSMEG_1275</i> ; Hyg <sup>R</sup>                           | This study                |
| pALACE-2148         | Expression vector for <i>MSMEG_2148</i> ; Hyg <sup>R</sup>                           | This study                |
| <i>E. coli</i>      |                                                                                      |                           |
| DH5α                | supE44 Δ lacU169(φ 80lacZΔ M15) <i>hsdR17recA1 endA1 gyrA96thi-1 relA1λ</i> pir      | Invitrogen                |
| <i>M. smegmatis</i> |                                                                                      |                           |
| mc <sup>2</sup> 155 | Electrocompetent wild-type strain of <i>M. smegmatis</i>                             | (Snapper et al. 1990)     |
| MS-VEC              | mc <sup>2</sup> 155 with pALACE plasmid                                              | This study                |
| MS-6762             | mc <sup>2</sup> 155 with pALACE- <i>MSMEG_6762</i> plasmid                           | This study                |
| MS-5583             | mc <sup>2</sup> 155 with pALACE- <i>MSMEG_5583</i> plasmid                           | This study                |
| MS-5876             | mc <sup>2</sup> 155 with pALACE- <i>MSMEG_5876</i> plasmid                           | This study                |
| MS-3404             | mc <sup>2</sup> 155 with pALACE- <i>MSMEG_3404</i> plasmid                           | This study                |
| MS-1275             | mc <sup>2</sup> 155 with pALACE- <i>MSMEG_1275</i> plasmid                           | This study                |
| MS-2148             | mc <sup>2</sup> 155 with pALACE- <i>MSMEG_2148</i> plasmid                           | This study                |
| Δ <i>MSMEG_1275</i> | Derivative mc <sup>2</sup> 155 of carrying an unmarked deletion in <i>MSMEG_1275</i> | This study                |
| Δ1275-6762          | Δ <i>MSMEG_1275</i> strain with pALACE-6762 plasmid                                  | This study                |
| Δ1275-VEC           | Δ <i>MSMEG_1275</i> strain with pALACE plasmid                                       | This study                |

Table S1. Bacterial strains and plasmids in this study. a. The following abbreviations are used: Hyg<sup>R</sup>, hygromycin B resistance; Kan<sup>R</sup>, kanamycin resistance

## Reference

- Du Q, Long Q, Mao J, Fu T, Duan X, Xie J (2014) Characterization of a novel mutation in the overlap of *tlyA* and *ppnK* involved in capreomycin resistance in *Mycobacterium*. IUBMB life 66(6):405-414
- Kessel JCv, Hatfull GF (2008) *Mycobacterial recombineering Chromosomal Mutagenesis*. Springer, pp 203-215
- Pandey AK, Raman S, Proff R, Joshi S, Kang C-M, Rubin EJ, Husson RN, Sassetti CM (2009)

Nitrile-inducible gene expression in mycobacteria. *Tuberculosis* 89(1):12-16

Snapper SB, Melton RE, Mustafa S, Kieser T, Jacobs WR, Jr. (1990) Isolation and characterization of efficient plasmid transformation mutants of *Mycobacterium smegmatis*. *Mol Microbiol* 4(11):1911-9
