# Supplementary material for: ArsR Family Regulator MSMEG_6762 Mediates the Programmed Cell Death by Regulating the Expression of HNH Nuclease in Mycobacteria
Source: MDPI journal article supplement (doi:10.3390/microorganisms10081535), 2022-07-29
Supplement: s1 [file s1]

| Name                                                            | Forward (F) (5'-3') <sup>a</sup>                        | Reverse (R) (5'-3')                       |
|-----------------------------------------------------------------|---------------------------------------------------------|-------------------------------------------|
| <b>Oligonucleotides used for expression vector construction</b> |                                                         |                                           |
| pALACE-<br><i>MSMEG_6762</i>                                    | CGGGATCCTTGACGTTGTGTG<br>GGTGACCGTGA                    | CCATCGATATGTCAGTCCTCCTT<br>GAGCGGTTCG     |
| pALACE-<br><i>MSMEG_5583</i>                                    | TGCCTTAAGATGTGTCTACTTGT<br>CGTACCCGTCT                  | AATTCCATATGTTGCGTTGATCC<br>GTGGCCCAATTGT  |
| pALACE-<br><i>MSMEG_1756</i>                                    | TGCCTTAAGGAGGTTGCGTTAG<br>GCATGCCCGAAG                  | AATTCCATATGGCAGTCAGGAC<br>GCCGTTTGGCACA   |
| pALACE-<br><i>MSMEG_5876</i>                                    | TGCCTTAAGTCTACTGCAGCAA<br>TGTGTGCCAGGG                  | AATTCCATATGCGACGAGAACT<br>AGTACGACTTGCC   |
| pALACE-<br><i>MSMEG_3404</i>                                    | TGCCTTAAGTTCTGCGATGATGG<br>GGTCATGACGT                  | AATTCCATATGTCTCGTCGCTCA<br>ACCTAGTTGGCTG  |
| pALACE-<br><i>MSMEG_1275</i>                                    | TGCCTTAAGGGTGGCGTGACAG<br>GAGCATCCGATC                  | AATTCCATATGCGAGCCACACT<br>GAGAATCACCCGT   |
| pALACE-<br><i>MSMEG_2148</i>                                    | TGCCTTAAGGAGGAGCAAAGTG<br>TGTGGTTCAGTT                  | AATTCCATATGCGTGAGCGCTAT<br>TTCCCTTTTGGTT  |
| pNIT-<br><i>MSMEG_6762</i>                                      | CGCATATGGAATTCATGTGGGTG<br>ACCGTGATCGACGAG              | CGCATGCGGATCCGTCCTCCTT<br>GAGCGGTTCGGATGA |
| <b>Oligonucleotides used for site directed mutagenesis</b>      |                                                         |                                           |
| 6762 <sub>L18A</sub>                                            | GCGCTCTTCCACGCGGTAGCCG<br>ACCGCACGAGG                   | CCTCGTGCGGTTCGGCTACCGCG<br>TGGAAGAGCGC    |
| 6762 <sub>R24A</sub>                                            | CTCGCCGACCGCACGGTACGCG<br>ACATCATGCGC                   | GCGCATGATGTGCGGTACCGTG<br>CGGTCGGCGAG     |
| 6762 <sub>H54A</sub>                                            | GCGGCGGTGCAGAAGGTAGTTG<br>CGGTGCTGGAG                   | CTCCAGCACCGCAACTACCTTC<br>TGCACCGCCGC     |
| 6762 <sub>L58A</sub>                                            | GAAGCATGTTGCGGTGGTAGAG<br>AAAGCCGGCCTG                  | GCAGGCCGGCTTTCTCTACCAC<br>CGCAACATGCTTC   |
| 1275 <sub>H258A</sub>                                           | GAACAACCCGATCGACGTAGTG<br>CTGCCCTGGTCAC                 | GTGACCAGGGCAGCACTACGTC<br>GATCGGGTTGTTC   |
| 1275 <sub>N272A</sub>                                           | TATCGACGGCCTGGCCGTACTG<br>GTGCTGGCGTGCG                 | CGCACGCCAGCACCAGTACGGC<br>CAGGCCGTCGATA   |
| 1275 <sub>N281A</sub>                                           | GGCGTGCGCGCGCTGCGTAGGC<br>GACAAGGGTGGC                  | CGCCACCCTTGTCGCCCTACGCA<br>GCGCGCGCACGCC  |
| <b>Oligonucleotides used for knockout and verification</b>      |                                                         |                                           |
| KO1275-1                                                        | CGGGATCCGCGAACTTCTTCAG<br>CGACAGGTCAT                   | AGATCTGCCACCCCCATGTCGG<br>TGCACTGCG       |
| KO1275-2                                                        | TGCACCGACATGGGGTGGCAG<br>ATCTTCTCAGTGTGGCTCGAA<br>ACCCG | GGGGTACCGATTTCACCACGAT<br>GTCGTTGGGCG     |
| 1275veri                                                        | CGCTGTCGGTTCCTTCGTGATA<br>AT                            | TGTACATCGACTCTCTTCTCAGC<br>CC             |
| <b>Cloning and protein purification</b>                         |                                                         |                                           |
| pET6762                                                         | CGGAATTCGTTGTGTGGGTGAC<br>CGTGATCGACG                   | CCCAAGCTTTCAGTCCTCCTTG<br>AGCGGTTTCGGAT   |

|                                       |                                         |                                         |
|---------------------------------------|-----------------------------------------|-----------------------------------------|
| pET1275                               | CGGAATTCGTGACAGGAGCATC<br>CGATCCGCTGCTA | ATAAGAATGCGGCCGCTACGGG<br>TTTCGAGCCACAC |
| <b>Oligonucleotides used for EMSA</b> |                                         |                                         |
| <i>MSMEG_1275p1</i>                   | GGACGCCATGTTGGATGCCATT<br>GCC           | CACGAAGGGAACCGACAGCGT<br>GGCC           |
| <i>MSMEG_1275p2</i>                   | GATGCCATTGCCAGAAGCGCTC<br>TCG           | GACGAGTACTGGGCCGCTCTGG<br>ACG           |
| <i>MSMEG_1275p3</i>                   | GTCGGACAGCGTGCGGATCACC<br>GGC           | GGAACCGACAGCGTGGCCCAA<br>CTTG           |

Table S2. Oligonucleotides used for RT-PCR, cloning (restriction sites are underlined and in bold), site directed mutagenesis (target mutated nucleotides are underlined), knockout and verification (restriction sites are underlined), and EMSA.
