# Supplementary material for: ArsR Family Regulator MSMEG_6762 Mediates the Programmed Cell Death by Regulating the Expression of HNH Nuclease in Mycobacteria
Source: MDPI journal article supplement (doi:10.3390/microorganisms10081535), 2022-07-29
Supplement: s1 [file s1]

## Supplementary Information

### **ArsR family regulator MSMEG\_6762 mediates the programmed cell death by regulating the expression of HNH nuclease in mycobacteria**

Xiangke Duan<sup>1, 4#</sup>, Xue Huang<sup>1#</sup>, Junqi Xu<sup>1#</sup>, Xue Li<sup>1</sup>, Jingjing Niu<sup>1</sup>, Xiaoli Du<sup>2</sup>, Xiaoyu Wang<sup>1</sup>, Jiang Li<sup>1</sup>, Michael Kelly<sup>3</sup>, Jiaohan Guo<sup>1</sup>, Ke Zhang<sup>1</sup>, Yu Huang<sup>1</sup>, Biao Kan<sup>2</sup>, Jianping Xie<sup>1\*</sup>

<sup>1</sup> Institute of Modern Biopharmaceuticals, State Key Laboratory Breeding Base of Eco-Environment and Bio-Resource of the Three Gorges Area, School of Life Sciences, Southwest University, Chongqing 400715, China

<sup>2</sup> National Institute for Communicable Disease Control and Prevention, Chinese Center for Disease Control and Prevention, Beijing 102206, China

<sup>3</sup> Saint John's University, 2850 Abbey Plaza, Collegeville, MN, 56321, USA

<sup>4</sup> Shenzhen Center for Disease Control and Prevention, Shenzhen, 518055, China

Running Head: Programmed cell death in mycobacteria

\* Correspondence to Jianping Xie. Email: georgex@swu.edu.cn

# These authors contributed equally to this work

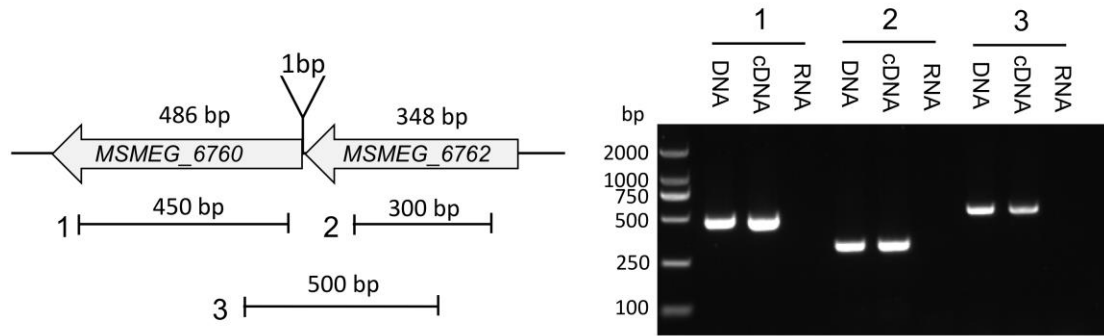

**Figure S1. Genetic organization and co-transcription analysis of *MSMEG\_6762-MSMEG\_6760*.** Total RNAs extracted from *M. smegmatis* mc<sup>2</sup> 155 were used to synthesize cDNAs. PCR was carried out with primer pairs indicated above the lanes.

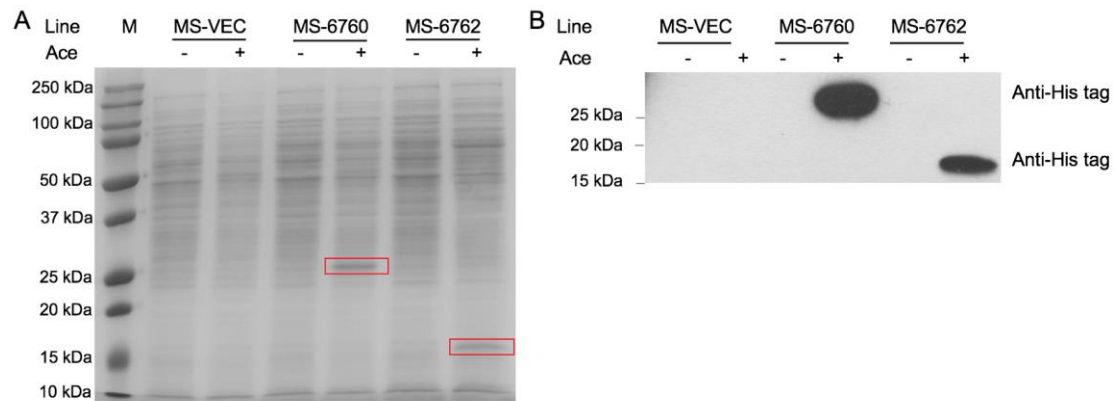

**Figure S2. The expression of *MSMEG\_6760* and *MSMEG\_6762* in *M. smegmatis*.** (A) The total protein of MS-VEC, MS-6760 and MS-6762 in the absence/presence inducer. (B) Western blot analysis of the expression of *MSMEG\_6760* and *MSMEG\_6762* in *M. smegmatis*.

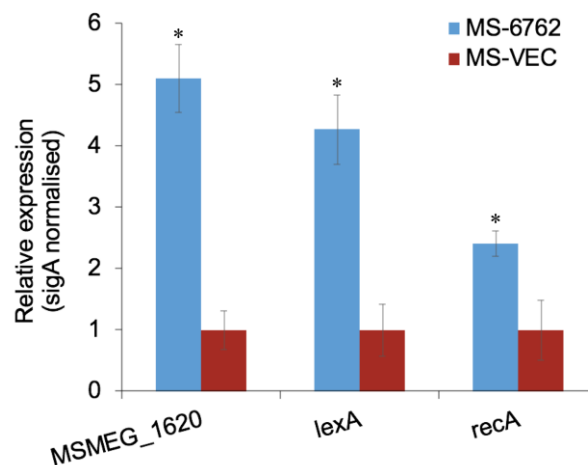

**Figure S3. Verification of RNA-seq results by real-time PCR.** Numbers means the numbering of gene in *M. smegmatis* mc<sup>2</sup> 155. The data were averaged from three independent experiments  $\pm$  s.d. Significant differences ( $*p < 0.05$ ).

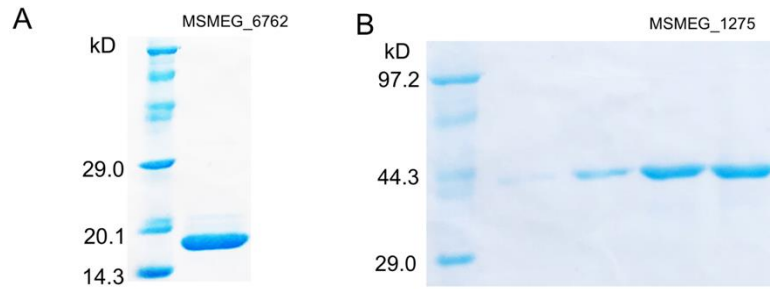

**Figure S4. SDS-PAGE gel of recombinant *M. smegmatis* protein expressed and purified from *E. coli*.** (A) Wild type (WT) MSMEG\_6762 (18.94 kD). (B) MSMEG\_1275 (45.61kD).

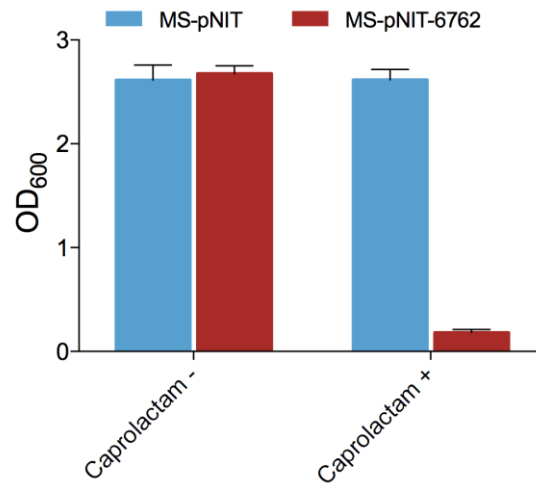

**Figure S5. The effect of MSMEG\_6762 on *M. smegmatis* growth when overexpressed by pNIT plasmid.** OD<sub>600</sub> of MS-pNIT and MS-pNIT-6762 were measured after 24 h growth with and without caprolactam (final concentration 28 mM).
