# Supplementary material for: ArsR Family Regulator MSMEG_6762 Mediates the Programmed Cell Death by Regulating the Expression of HNH Nuclease in Mycobacteria
Source: Microorganisms. 2022 Jul 29;10(8):1535. doi: 10.3390/microorganisms10081535 (PMC9416677; doi:10.3390/microorganisms10081535)
Supplement: Supplementary file 1 [file microorganisms-10-01535-s001.zip]

Archive with 4 entries (4 files):
- Supplemental Information Figure S.pdf
- Supplemental Information Table S1.pdf
- Supplemental Information Table S2.pdf
- Supplemental Information Table S3.xlsx
