# Supplementary material for: ArsR Family Regulator MSMEG_6762 Mediates the Programmed Cell Death by Regulating the Expression of HNH Nuclease in Mycobacteria
Source: Microorganisms. 2022 Jul 29;10(8):1535. doi: 10.3390/microorganisms10081535 (PMC9416677; doi:10.3390/microorganisms10081535)
Supplement: Supplementary file 1 [file microorganisms-10-01535-s001.zip › Supplemental Information Table S3.xlsx]

## Sheet: Upregulation
gene id	gene name	description	locus	log2FC	Pvalue	Qvalue	updown
4534128	rpmG	50S ribosomal protein L33	NC_008596.1:6133305-6133469	Inf	1.1e-05	3.65e-05	UP
4533274	MSMEG_6534	hypothetical protein	NC_008596.1:6591922-6592053	Inf	0.0164534	0.0304811	UP
4532009	MSMEG_6762	transcriptional regulator	NC_008596.1:6807460-6807807	8.61992	0	0	UP
4532433	MSMEG_1620	hypothetical protein	NC_008596.1:1709234-1709941	7.12245	3.99e-254	1.33e-250	UP
4536980	MSMEG_1622	DNA repair polymerase	NC_008596.1:1709944-1711521	6.2624	9.78e-236	2.17e-232	UP
4531534	rpmB	50S ribosomal protein L28	NC_008596.1:6133469-6133705	6.00026	8.3e-59	5.57e-57	UP
4531127	MSMEG_4009	vanillate O-demethylase	NC_008596.1:4083529-4083852	4.88554	7.67e-08	3.39e-07	UP
4536521	rpsN	30S ribosomal protein S14	NC_008596.1:6133000-6133305	4.40012	8.9e-29	1.92e-27	UP
4531063	MSMEG_5583	HNH endonuclease	NC_008596.1:5671280-5673175	4.33398	1.52e-139	9.2e-137	UP
4533544	rpsR	30S ribosomal protein S18	NC_008596.1:6132746-6133003	4.16259	1.01e-39	3.45e-38	UP
4535004	MSMEG_0273	ethanolamine utilization protein EutN	NC_008596.1:306097-306360	4.02755	0.000354113	0.000913384	UP
4535099	MSMEG_2990(Rv2578c)	Fe-S protein, radical SAM family protein	NC_008596.1:3056145-3057179	4.02226	6e-124	2.1e-121	UP
4535358	MSMEG_2742	DNA-damage-inducible protein	NC_008596.1:2813632-2814189	3.97439	8.37e-127	3.48e-124	UP
4535140	MSMEG_6891	pseudo	NC_008596.1:6937486-6937740	3.89908	9.68e-111	2.38e-108	UP
4532570	MSMEG_6892	replicative DNA helicase	NC_008596.1:6937984-6941058	3.89816	7e-131	3.58e-128	UP
4536540	dnaE2	error-prone DNA polymerase	NC_008596.1:1722325-1725612	3.74549	9.14e-116	2.53e-113	UP
4534562	MSMEG_1267	pseudo	NC_008596.1:1356367-1357844	3.50577	1.02e-108	2.42e-106	UP
4532411	MSMEG_6162	IS1096, tnpR protein	NC_008596.1:6234400-6235101	3.48705	0.00709348	0.0142405	UP
4531627	MSMEG_6782	hypothetical protein	NC_008596.1:6830819-6831088	3.36374	1.74e-94	3.13e-92	UP
4536640	MSMEG_2514	pseudo	NC_008596.1:2599455-2601142	3.18807	9.1e-45	3.78e-43	UP
4533583	MSMEG_2801	hypothetical protein	NC_008596.1:2866445-2866564	3.15662	8.42e-13	6.14e-12	UP
4534824	MSMEG_4566	pseudo	NC_008596.1:4657101-4658643	3.11334	3.14e-82	4.01e-80	UP
4534925	MSMEG_6783	integral membrane protein	NC_008596.1:6831167-6832159	3.10333	2.73e-90	4.33e-88	UP
4534823	MSMEG_6025	hypothetical protein	NC_008596.1:6090096-6091412	3.0787	1.58e-78	1.85e-76	UP
4534372	dinP	DNA polymerase IV	NC_008596.1:6508015-6509226	3.06999	5.76e-76	6.17e-74	UP
4537501	MSMEG_1621	pyrimidine-specific ribonucleoside hydrolase RihA	NC_008596.1:1711512-1712564	3.05777	1.2e-85	1.74e-83	UP
4532773	MSMEG_1943	ATP-dependent DNA helicase	NC_008596.1:2020443-2023706	2.99584	1.34e-84	1.89e-82	UP
4534301	MSMEG_1941	helicase, UvrD/Rep family protein	NC_008596.1:2017285-2020422	2.96155	1.29e-83	1.68e-81	UP
4537555	MSMEG_6051	pseudo	NC_008596.1:6118443-6120448	2.95834	1.22e-56	7.11e-55	UP
4535104	MSMEG_6781	hypothetical protein	NC_008596.1:6829246-6830718	2.88217	1.47e-71	1.36e-69	UP
4532385	MSMEG_4399	hypothetical protein	NC_008596.1:4489599-4489976	2.87191	2.59e-71	2.36e-69	UP
4533593	MSMEG_1231	inner membrane protein YidH	NC_008596.1:1301495-1301863	2.83495	0.0049184	0.0101878	UP
4531668	MSMEG_0850	hypothetical protein	NC_008596.1:934162-935004	2.69135	9.18e-55	5.22e-53	UP
4534150	MSMEG_5026	hypothetical protein	NC_008596.1:5122023-5123474	2.65337	9.18e-57	5.45e-55	UP
4535247	MSMEG_5421	hypothetical protein	NC_008596.1:5501007-5503937	2.62849	3.22e-60	2.23e-58	UP
4536523	MSMEG_6890	antibiotic biosynthesis monooxygenase domain-containing protein	NC_008596.1:6937052-6937345	2.62677	1.29e-28	2.76e-27	UP
4532889	recB	exodeoxyribonuclease V subunit beta	NC_008596.1:1422085-1425336	2.62312	6.01e-67	4.82e-65	UP
4535195	MSMEG_6006	hypothetical protein	NC_008596.1:6070523-6071269	2.5866	8.96e-58	5.67e-56	UP
4531515	rpmE2	50S ribosomal protein L31	NC_008596.1:6134990-6135238	2.56795	7.78e-10	4.37e-09	UP
4532068	MSMEG_1232	ABC transporter substrate-binding protein	NC_008596.1:1302007-1303464	2.5558	6.64e-11	4.12e-10	UP
4532928	MSMEG_0256	hypothetical protein	NC_008596.1:289749-290651	2.55517	3.82e-52	1.92e-50	UP
4531794	MSMEG_1280	hypothetical protein	NC_008596.1:1367426-1368148	2.52882	5.06e-57	3.11e-55	UP
4530909	MSMEG_5680	glyoxalase	NC_008596.1:5770134-5770589	2.52411	1.46e-63	1.11e-61	UP
4534171	MSMEG_1282	hypothetical protein	NC_008596.1:1371377-1372546	2.52065	7.03e-47	3.07e-45	UP
4532964	xth	exodeoxyribonuclease III	NC_008596.1:1751775-1752596	2.5159	4.05e-62	3.06e-60	UP
4535497	MSMEG_2984	hydrolase	NC_008596.1:3049055-3049870	2.4877	3.15e-59	2.14e-57	UP
4530967	MSMEG_4257	hypothetical protein	NC_008596.1:4340779-4341150	2.46584	2.63e-60	1.84e-58	UP
4534031	recD	exodeoxyribonuclease V subunit alpha	NC_008596.1:1420424-1422088	2.46234	2.13e-58	1.38e-56	UP
4531813	MSMEG_1756	endonuclease VIII	NC_008596.1:1845058-1845816	2.44914	4.88e-41	1.75e-39	UP
4530904	MSMEG_4859	oxidoreductase, short chain dehydrogenase/reductase	NC_008596.1:4954289-4955095	2.44778	4.96e-12	3.34e-11	UP
4532365	MSMEG_0873	hypothetical protein	NC_008596.1:960209-960379	2.44259	0.00536084	0.011015	UP
4532855	MSMEG_1266	ankyrin	NC_008596.1:1355685-1356374	2.4345	2.57e-34	7.05e-33	UP
4533477	MSMEG_0223	hypothetical protein	NC_008596.1:248954-249436	2.43082	1.58e-46	6.82e-45	UP
4531224	MSMEG_6713	hydroxyquinol 1,2-dioxygenase	NC_008596.1:6761579-6762454	2.41992	0.000770463	0.00186635	UP
4537391	MSMEG_2855	virulence factor Mce family protein	NC_008596.1:2917214-2918401	2.41203	2.65e-07	1.09e-06	UP
4535385	MSMEG_5584	short chain dehydrogenase	NC_008596.1:5673254-5674048	2.40375	1.61e-38	5.28e-37	UP
4533767	MSMEG_1084	peptide/opine/nickel uptake family protein ABC transporter periplasmic substrate-binding protein	NC_008596.1:1147718-1149322	2.39664	5.85e-09	2.96e-08	UP
4537499	MSMEG_1281	hypothetical protein	NC_008596.1:1368135-1371380	2.31815	6.55e-54	3.6e-52	UP
4536227	MSMEG_6069	CobW/P47K domain-containing protein	NC_008596.1:6133794-6134993	2.30369	4.86e-27	9.56e-26	UP
4534319	MSMEG_4421	hypothetical protein	NC_008596.1:4503695-4504246	2.30058	0.000132835	0.000369283	UP
4536754	MSMEG_2663	hypothetical protein	NC_008596.1:2743713-2745449	2.28783	1.2e-28	2.57e-27	UP
4534126	MSMEG_5004	DNA repair exonuclease	NC_008596.1:5102136-5103290	2.26256	5.02e-53	2.61e-51	UP
4533760	MSMEG_3213	hypothetical protein	NC_008596.1:3290670-3292352	2.25784	6.48e-52	3.17e-50	UP
4531324	lexA	LexA repressor	NC_008596.1:2812637-2813368	2.2423	5.94e-52	2.93e-50	UP
4537138	araB	ribulokinase	NC_008596.1:1808508-1810199	2.24177	4.51e-23	7.05e-22	UP
4536495	gidB	methyltransferase GidB	NC_008596.1:6982721-6983428	2.23526	1.44e-42	5.54e-41	UP
4535577	MSMEG_5599	hypothetical protein	NC_008596.1:5686048-5686182	2.22673	2.67e-13	2.06e-12	UP
4530822	MSMEG_5157	hypothetical protein	NC_008596.1:5259594-5259890	2.22636	2.31e-40	8.01e-39	UP
4533970	MSMEG_0222	hypothetical protein	NC_008596.1:248214-248957	2.22584	2.24e-50	1.05e-48	UP
4536343	recC	exodeoxyribonuclease V subunit gamma	NC_008596.1:1425333-1428596	2.22203	9.98e-51	4.77e-49	UP
4531397	MSMEG_1757	DEAD/DEAH box helicase	NC_008596.1:1845819-1850342	2.16663	9.67e-49	4.43e-47	UP
4534343	hypA	hydrogenase nickel incorporation protein HypA	NC_008596.1:2791809-2792138	2.15988	1.38e-07	5.95e-07	UP
4531832	MSMEG_5044	ATPase	NC_008596.1:5138997-5142446	2.15921	4.16e-48	1.89e-46	UP
4532316	MSMEG_2858	virulence factor mce family protein	NC_008596.1:2920508-2921965	2.15838	1.83e-18	2.1e-17	UP
4536858	MSMEG_1279	hypothetical protein	NC_008596.1:1365999-1367429	2.15651	7.72e-48	3.45e-46	UP
4537597	MSMEG_2741	hypothetical protein	NC_008596.1:2813453-2813581	2.12698	1.03e-07	4.51e-07	UP
4537198	MSMEG_0004	hypothetical protein	NC_008596.1:3775-4359	2.11943	1.18e-42	4.58e-41	UP
4535123	MSMEG_6050	solute-binding lipoprotein	NC_008596.1:6117544-6118446	2.10222	8e-17	7.93e-16	UP
4537731	MSMEG_0907	hypothetical protein	NC_008596.1:993284-993628	2.06928	2.93e-08	1.37e-07	UP
4530999	MSMEG_2854	hypothetical protein	NC_008596.1:2916342-2917187	2.0669	6.3e-05	0.000184972	UP
4535364	MSMEG_6463	IS1096, tnpR protein	NC_008596.1:6528498-6529199	2.02759	0.0013215	0.00308104	UP
4537092	MSMEG_0421	hypothetical protein	NC_008596.1:496794-496940	2.02757	0.0033378	0.00715689	UP
4534057	MSMEG_1122	hypothetical protein	NC_008596.1:1186298-1186426	2.02755	0.0139282	0.0262639	UP
4537174	MSMEG_0277	aminotransferase	NC_008596.1:309098-310378	2.02747	4.56e-09	2.34e-08	UP
4535085	MSMEG_5216	glyoxalase	NC_008596.1:5312778-5313185	2.02029	5.84e-42	2.22e-40	UP
4537346	MSMEG_1712	ABC transporter periplasmic protein	NC_008596.1:1807122-1808108	2.01712	6.12e-13	4.52e-12	UP
4536300	MSMEG_1507	D-aminopeptidase	NC_008596.1:1598476-1599585	2.00728	4.73e-08	2.15e-07	UP
4535615	dnaN	DNA polymerase III subunit beta	NC_008596.1:499-1692	2.0063	3.25e-43	1.28e-41	UP
4534290	MSMEG_0080	hypothetical protein	NC_008596.1:103713-104243	2.00179	9.94e-31	2.32e-29	UP
4532600	MSMEG_6856	MmgE/PrpD family protein	NC_008596.1:6905010-6906443	1.99423	5.01e-09	2.55e-08	UP
4530928	MSMEG_0008	tRNA	NC_008596.1:10072-10148	1.99085	2.66e-05	8.27e-05	UP
4535160	MSMEG_5002	hypothetical protein	NC_008596.1:5099506-5102139	1.96938	7.57e-42	2.83e-40	UP
4536606	MSMEG_6700	regulatory protein	NC_008596.1:6750061-6750798	1.96603	5.8e-29	1.26e-27	UP
4537214	MSMEG_0504	carbohydrate kinase	NC_008596.1:583427-584413	1.96269	5.16e-28	1.08e-26	UP
4532650	recF	recombination protein F	NC_008596.1:2624-3778	1.95499	1.13e-40	4e-39	UP
4533510	MSMEG_1871	hypothetical protein	NC_008596.1:1948496-1948774	1.95345	4.02e-12	2.75e-11	UP
4537602	MSMEG_2859	virulence factor Mce family protein	NC_008596.1:2921962-2923152	1.948	1.79e-06	6.65e-06	UP
4532146	MSMEG_5586	hypothetical protein	NC_008596.1:5674061-5675137	1.94446	8.96e-30	2.01e-28	UP
4533236	MSMEG_6941	R3H domain-containing protein	NC_008596.1:6983492-6984043	1.94277	3.27e-40	1.13e-38	UP
4535566	MSMEG_0056	hypothetical protein	NC_008596.1:76213-76530	1.94037	1.9e-22	2.83e-21	UP
4534583	MSMEG_0079	hypothetical protein	NC_008596.1:102936-103682	1.93796	7.99e-31	1.88e-29	UP
4537110	MSMEG_2508	hypothetical protein	NC_008596.1:2593267-2593641	1.93441	0.0220571	0.0396897	UP
4531720	MSMEG_6712	maleylacetate reductase	NC_008596.1:6760497-6761582	1.93431	4.16e-09	2.14e-08	UP
4531604	MSMEG_2548	3-oxoacyl-ACP reductase	NC_008596.1:2632377-2633153	1.93423	0.000532203	0.00132642	UP
4532488	recA	recombinase A	NC_008596.1:2792363-2793412	1.93367	1.19e-40	4.16e-39	UP
4537643	MSMEG_1312	hypothetical protein	NC_008596.1:1406153-1406749	1.92784	1.42e-36	4.26e-35	UP
4531782	MSMEG_2138	tRNA	NC_008596.1:2213142-2213214	1.92065	0.00129088	0.00301493	UP
4531437	recX	recombination regulator RecX	NC_008596.1:2793381-2793947	1.91527	1.24e-39	4.15e-38	UP
4537385	MSMEG_2238	aldehyde dehydrogenase	NC_008596.1:2318803-2320329	1.91492	6.3e-05	0.000184972	UP
4537512	MSMEG_1233	pseudo	NC_008596.1:1303496-1304382	1.91492	6.3e-05	0.000184972	UP
4536821	MSMEG_0040	hypothetical protein	NC_008596.1:59041-59346	1.91193	8.6e-06	2.89e-05	UP
4532652	MSMEG_0910	hypothetical protein	NC_008596.1:995033-995167	1.90716	2.97e-14	2.46e-13	UP
4530865	MSMEG_4869	LAO/AO transporter ATPase	NC_008596.1:4966836-4967720	1.90201	0.00321713	0.00692048	UP
4532453	MSMEG_6250	glutamate--cysteine ligase	NC_008596.1:6315542-6316813	1.89837	8.89e-39	2.95e-37	UP
4532699	MSMEG_6922	transporter major facilitator family protein	NC_008596.1:6964262-6965557	1.8906	6.71e-38	2.15e-36	UP
4537282	MSMEG_0081	hypothetical protein	NC_008596.1:104251-104583	1.87879	2.61e-23	4.15e-22	UP
4536947	MSMEG_5681	ferredoxin/ferredoxin--NADP reductase	NC_008596.1:5770593-5772266	1.87097	1.41e-37	4.48e-36	UP
4535926	MSMEG_2513	hypothetical protein	NC_008596.1:2598528-2599364	1.86718	1.64e-20	2.15e-19	UP
4532258	MSMEG_1872	hypothetical protein	NC_008596.1:1948794-1949663	1.86218	1.18e-30	2.74e-29	UP
4533548	ruvC	Holliday junction resolvase	NC_008596.1:3004295-3004852	1.859	1.28e-36	3.85e-35	UP
4531721	dnaA	chromosomal replication initiation protein	NC_008596.1:6986600-6988114	1.85642	3.99e-37	1.23e-35	UP
4535269	MSMEG_5083	hypothetical protein	NC_008596.1:5181889-5182272	1.85062	3.05e-35	8.68e-34	UP
4535321	MSMEG_0512	BadF/BadG/BcrA/BcrD ATPase	NC_008596.1:592124-593104	1.85055	9.44e-09	4.66e-08	UP
4533207	MSMEG_4210	hypothetical protein	NC_008596.1:4293097-4294080	1.84762	1.9e-23	3.07e-22	UP
4531015	MSMEG_0851	citrate transporter	NC_008596.1:935059-936345	1.84719	6.52e-23	1.01e-21	UP
4536178	MSMEG_0002	6-phosphogluconate dehydrogenase	NC_008596.1:1721-2614	1.84267	4.01e-37	1.23e-35	UP
4533928	MSMEG_4882	short chain dehydrogenase	NC_008596.1:4978264-4979124	1.83474	1.25e-07	5.42e-07	UP
4535084	MSMEG_5417	hypothetical protein	NC_008596.1:5496611-5496763	1.82812	7.27e-21	9.8e-20	UP
4533191	MSMEG_5628	oxidoreductase, short chain dehydrogenase/reductase	NC_008596.1:5712981-5713826	1.81165	0.000779146	0.00188532	UP
4532540	MSMEG_0058	hypothetical protein	NC_008596.1:77398-77925	1.8088	4.15e-24	6.9e-23	UP
4535916	MSMEG_1449	pseudo	NC_008596.1:1545377-1545797	1.80503	1.94e-05	6.15e-05	UP
4531254	MSMEG_0083	membrane-anchored mycosin mycp1	NC_008596.1:105985-107334	1.80368	5.4e-34	1.46e-32	UP
4534219	tag	DNA-3-methyladenine glycosylase I	NC_008596.1:5181263-5181892	1.803	7.12e-35	2e-33	UP
4533650	MSMEG_4725	tRNA	NC_008596.1:4817832-4817907	1.79998	6.43e-05	0.000188136	UP
4536444	MSMEG_2218	enoyl-CoA hydratase/isomerase	NC_008596.1:2299418-2300200	1.79796	2.92e-06	1.05e-05	UP
4537354	MSMEG_0038	pseudo	NC_008596.1:58186-58648	1.79768	1.58e-17	1.68e-16	UP
4535517	MSMEG_1619	hypothetical protein	NC_008596.1:1709112-1709237	1.79312	0.0199353	0.0361259	UP
4537532	ssuD	nitrilotriacetate monooxygenase component A	NC_008596.1:4167383-4168717	1.79297	1.94e-21	2.7e-20	UP
4533893	MSMEG_1326	hypothetical protein	NC_008596.1:1420278-1420427	1.79072	1.14e-10	6.92e-10	UP
4534287	MSMEG_0257	long-chain-fatty-acid--CoA ligase	NC_008596.1:290685-292199	1.78876	4.14e-23	6.5e-22	UP
4535687	MSMEG_6942	inner membrane protein translocase component YidC	NC_008596.1:6984079-6985182	1.78847	8.68e-35	2.42e-33	UP
4536205	MSMEG_5623	L-carnitine dehydratase/bile acid-inducible protein F	NC_008596.1:5706470-5707621	1.78643	4.28e-05	0.000128716	UP
4536355	MSMEG_1534	hypothetical protein	NC_008596.1:1620683-1622059	1.78416	5.86e-17	5.92e-16	UP
4537311	MSMEG_1711	ABC transporter ATP-binding protein	NC_008596.1:1805591-1807099	1.78232	3.19e-15	2.83e-14	UP
4536238	MSMEG_4259	hypothetical protein	NC_008596.1:4341162-4343180	1.77758	5.43e-34	1.46e-32	UP
4533638	MSMEG_5214	RNA polymerase sigma-70 factor	NC_008596.1:5311646-5312170	1.77139	1.26e-23	2.06e-22	UP
4532987	MSMEG_0503	DeoR family transcriptional regulator	NC_008596.1:582477-583253	1.76937	2.43e-22	3.59e-21	UP
4534304	MSMEG_6699	hypothetical protein	NC_008596.1:6749195-6750064	1.75936	5.77e-25	1.01e-23	UP
4536847	MSMEG_6926	tRNA adenylyltransferase	NC_008596.1:6966955-6968397	1.75621	3.42e-33	8.87e-32	UP
4535596	MSMEG_0082	hypothetical protein	NC_008596.1:104594-105988	1.75498	1.18e-31	2.86e-30	UP
4532794	nrdR	NrdR family transcriptional regulator	NC_008596.1:2814351-2814803	1.75148	1.99e-33	5.22e-32	UP
4531069	MSMEG_6898	hypothetical protein	NC_008596.1:6943613-6944188	1.75141	1.55e-25	2.82e-24	UP
4532200	MSMEG_5532	FAD dependent oxidoreductase	NC_008596.1:5620808-5622400	1.7414	1.36e-22	2.05e-21	UP
4531166	MSMEG_0319	acyltransferase	NC_008596.1:352236-353429	1.73812	1.95e-31	4.67e-30	UP
4532675	MSMEG_6248	hypothetical protein	NC_008596.1:6313576-6314259	1.73445	3.61e-32	8.93e-31	UP
4532591	MSMEG_3957	hypothetical protein	NC_008596.1:4027120-4028703	1.73223	3.64e-24	6.08e-23	UP
4535763	MSMEG_1961	hypothetical protein	NC_008596.1:2040821-2041996	1.73141	4.87e-26	9.15e-25	UP
4533239	MSMEG_5723	endoribonuclease L-psp family protein	NC_008596.1:5807129-5807560	1.73086	8.7e-26	1.6e-24	UP
4532254	MSMEG_6944	hypothetical protein	NC_008596.1:6985175-6985522	1.72861	1.86e-27	3.73e-26	UP
4534241	MSMEG_0457	DNA topoisomerase IV subunit B	NC_008596.1:532147-534180	1.72518	5.55e-33	1.42e-31	UP
4531732	MSMEG_0456	DNA gyrase subunit A	NC_008596.1:529995-532136	1.72364	6.33e-33	1.61e-31	UP
4535435	MSMEG_1952	ATP-dependent DNA helicase	NC_008596.1:2029125-2031275	1.71912	1.33e-32	3.34e-31	UP
4532312	MSMEG_2531	GntR family transcriptional regulator	NC_008596.1:2617653-2618345	1.71126	4.68e-11	2.94e-10	UP
4531357	MSMEG_0057	hypothetical protein	NC_008596.1:76535-77383	1.70551	2.78e-29	6.13e-28	UP
4535394	MSMEG_3956	alkylhydroperoxidase	NC_008596.1:4026826-4027116	1.70544	0.00109522	0.00258612	UP
4535706	nuoI	NADH dehydrogenase subunit I	NC_008596.1:2133871-2134413	1.70544	0.00109522	0.00258612	UP
4530984	MSMEG_6420	abortive infection protein	NC_008596.1:6490338-6491120	1.7012	4.87e-22	7.07e-21	UP
4532446	MSMEG_2802	hypothetical protein	NC_008596.1:2867294-2867707	1.69515	1.97e-25	3.57e-24	UP
4537507	MSMEG_4103	alkanesulfonate monooxygenase	NC_008596.1:4182282-4183370	1.68734	5.21e-07	2.06e-06	UP
4533041	trxB	thioredoxin-disulfide reductase	NC_008596.1:6976965-6977900	1.68692	3.83e-32	9.43e-31	UP
4531582	MSMEG_4892	hypothetical protein	NC_008596.1:4988175-4988669	1.68515	2.77e-12	1.93e-11	UP
4531168	MSMEG_5045	D-2-hydroxyacid dehydrogenase	NC_008596.1:5142459-5143814	1.67826	3.51e-26	6.67e-25	UP
4536414	MSMEG_1691	transcriptional regulatory protein	NC_008596.1:1782369-1785062	1.67513	7.6e-08	3.37e-07	UP
4533584	MSMEG_2662	hypothetical protein	NC_008596.1:2743220-2743516	1.67315	5.6e-08	2.53e-07	UP
4535849	MSMEG_0908	hypothetical protein	NC_008596.1:993604-994002	1.66792	1.88e-05	5.96e-05	UP
4534871	MSMEG_0078	hypothetical protein	NC_008596.1:102127-102702	1.66054	4.64e-28	9.72e-27	UP
4532015	MSMEG_4543	ABC transporter	NC_008596.1:4633332-4634315	1.65545	0.000495234	0.00124596	UP
4532629	MSMEG_0224	O-methyltransferase MdmC	NC_008596.1:249456-250112	1.64714	8.6e-30	1.94e-28	UP
4533133	MSMEG_0276	aldehyde-alcohol dehydrogenase	NC_008596.1:307518-309101	1.64635	0.000134078	0.000372427	UP
4533812	MSMEG_6442	integral membrane protein	NC_008596.1:6509223-6509585	1.63889	1.83e-05	5.83e-05	UP
4533024	MSMEG_4952	acyl-CoA synthetase	NC_008596.1:5047025-5048623	1.63534	1.78e-15	1.61e-14	UP
4533015	MSMEG_6249	hypothetical protein	NC_008596.1:6314259-6315545	1.63441	5.92e-30	1.35e-28	UP
4534210	MSMEG_3837	hypothetical protein	NC_008596.1:3907516-3908757	1.633	2.93e-29	6.45e-28	UP
4532712	MSMEG_4774	AMP-dependent synthetase/ligase	NC_008596.1:4876225-4877802	1.62532	1.3e-08	6.33e-08	UP
4537001	MSMEG_2174	superfamily protein I DNA or RNA helicase	NC_008596.1:2250877-2253087	1.61725	1.15e-29	2.57e-28	UP
4531699	MSMEG_6935	N-acetylmuramoyl-L-alanine amidase	NC_008596.1:6978405-6979595	1.61568	8.93e-30	2e-28	UP
4533293	MSMEG_0007	hypothetical protein	NC_008596.1:9229-10011	1.61514	2.59e-29	5.73e-28	UP
4537467	MSMEG_1815	hypothetical protein	NC_008596.1:1890966-1891139	1.61258	0.0177693	0.0325827	UP
4534586	MSMEG_1321	5-carboxymethyl-2-hydroxymuconate delta-isomerase	NC_008596.1:1417321-1417941	1.61241	9.68e-12	6.37e-11	UP
4535616	MSMEG_4010	glyoxalase	NC_008596.1:4083868-4084278	1.6124	5.61e-05	0.000165982	UP
4537461	MSMEG_1535	hypothetical protein	NC_008596.1:1623349-1624662	1.61239	3.69e-07	1.49e-06	UP
4531422	MSMEG_4824	hypothetical protein	NC_008596.1:4920923-4921702	1.61236	0.000737899	0.00179401	UP
4531200	MSMEG_4443	hypothetical protein	NC_008596.1:4526809-4527093	1.61232	0.00632641	0.0127894	UP
4533244	MSMEG_6853	3-isopropylmalate dehydratase small subunit	NC_008596.1:6902305-6902853	1.61232	0.00632641	0.0127894	UP
4531639	MSMEG_0044	hypothetical protein	NC_008596.1:61470-63548	1.61046	6.52e-29	1.42e-27	UP
4533155	MSMEG_0219	RNA polymerase factor sigma-70	NC_008596.1:245271-246293	1.60929	4.47e-29	9.77e-28	UP
4536480	MSMEG_5533	4Fe-4S ferredoxin	NC_008596.1:5622397-5622798	1.60316	4.33e-24	7.18e-23	UP
4533799	MSMEG_2638	hypothetical protein	NC_008596.1:2719412-2720602	1.59629	3.65e-07	1.48e-06	UP
4536058	MSMEG_6619	pseudo	NC_008596.1:6672830-6674105	1.59627	1.41e-27	2.87e-26	UP
4536713	rnpA	ribonuclease P protein component	NC_008596.1:6985519-6985890	1.59444	1.44e-27	2.91e-26	UP
4532036	MSMEG_0513	integral membrane protein	NC_008596.1:593126-594091	1.58935	1.17e-05	3.86e-05	UP
4534480	MSMEG_5853	cytochrome P450	NC_008596.1:5919783-5921018	1.5869	2.53e-05	7.88e-05	UP
4537537	MSMEG_6052	ABC transporter ATP-binding protein	NC_008596.1:6120497-6121207	1.5849	3.77e-10	2.18e-09	UP
4534400	MSMEG_2555	hypothetical protein	NC_008596.1:2639368-2639781	1.58271	1.42e-21	1.99e-20	UP
4534785	MSMEG_6826	L-lactate permease	NC_008596.1:6876287-6877969	1.58155	2.53e-11	1.61e-10	UP
4536904	MSMEG_6900	penicillin-binding protein 1	NC_008596.1:6945615-6947972	1.57816	1.62e-28	3.46e-27	UP
4535230	MSMEG_4864	3-ketosteroid-delta-1-dehydrogenase	NC_008596.1:4959104-4960867	1.57489	0.000442376	0.00112157	UP
4534756	MSMEG_4867	2-hydroxy-6-ketonona-2,4-dienedioic acid hydrolase	NC_008596.1:4963428-4964336	1.57339	3.77e-06	1.34e-05	UP
4532263	MSMEG_0271	hypothetical protein	NC_008596.1:305144-305800	1.57174	5.41e-06	1.88e-05	UP
4535771	MSMEG_6901	hypothetical protein	NC_008596.1:6948091-6948579	1.56985	1.15e-27	2.35e-26	UP
4531030	MSMEG_6927	MutT/nudix family protein	NC_008596.1:6968482-6969375	1.56712	4.25e-27	8.41e-26	UP
4537296	map	methionine aminopeptidase	NC_008596.1:5773416-5774180	1.56664	1.91e-21	2.66e-20	UP
4536106	MSMEG_2139	hypothetical protein	NC_008596.1:2213383-2213484	1.56511	4.9e-07	1.95e-06	UP
4535192	ligA	NAD-dependent DNA ligase LigA	NC_008596.1:2443172-2445277	1.56486	7.19e-28	1.48e-26	UP
4534316	rpmH	50S ribosomal protein L34	NC_008596.1:6985943-6986086	1.56294	2.35e-27	4.69e-26	UP
4534323	MSMEG_0045	hypothetical protein	NC_008596.1:63545-66013	1.55529	3.29e-27	6.54e-26	UP
4532072	MSMEG_6023	transposase	NC_008596.1:6088633-6089832	1.55466	1.71e-09	9.21e-09	UP
4533844	MSMEG_3911	oxidoreductase	NC_008596.1:3981247-3981558	1.55089	0.00938042	0.0183983	UP
4537723	ruvA	Holliday junction DNA helicase RuvA	NC_008596.1:3004849-3005436	1.54983	1.91e-26	3.69e-25	UP
4533459	MSMEG_0368	hypothetical protein	NC_008596.1:408516-409982	1.534	1.84e-26	3.56e-25	UP
4536585	MSMEG_6572	methyltransferase	NC_008596.1:6626297-6626989	1.53296	7.89e-17	7.86e-16	UP
4534860	MSMEG_6752	endoglucanase A	NC_008596.1:6796297-6797238	1.53194	5.89e-26	1.1e-24	UP
4531386	MSMEG_6246	pyridoxal-phosphate-dependent transferase	NC_008596.1:6311487-6312602	1.53068	2.34e-26	4.48e-25	UP
4533007	MSMEG_4780	cytochrome p450	NC_008596.1:4881695-4883008	1.52993	0.00101725	0.00242353	UP
4537254	recG	ATP-dependent DNA helicase RecG	NC_008596.1:2484645-2486906	1.52849	5.29e-26	9.87e-25	UP
4536893	MSMEG_4209	integral membrane protein	NC_008596.1:4292564-4293100	1.52786	4.21e-08	1.93e-07	UP
4534930	MSMEG_3815	drug efflux membrane protein	NC_008596.1:3883930-3885315	1.52554	1.8e-25	3.26e-24	UP
4532956	MSMEG_5904	hypothetical protein	NC_008596.1:5964647-5964838	1.51598	3.38e-20	4.32e-19	UP
4534625	MSMEG_1758	hypothetical protein	NC_008596.1:1850404-1850577	1.51286	0.000385441	0.000987674	UP
4535913	MSMEG_4846	enoyl-CoA hydratase	NC_008596.1:4941334-4942116	1.5022	1.19e-10	7.2e-10	UP
4532007	MSMEG_6621	luciferase	NC_008596.1:6674557-6675408	1.50187	8.65e-14	6.89e-13	UP
4534888	MSMEG_5826	pyruvate decarboxylase	NC_008596.1:5892606-5894912	1.49852	5.93e-25	1.04e-23	UP
4534230	MSMEG_2839	transcriptional accessory protein	NC_008596.1:2899010-2901400	1.49814	3.84e-26	7.25e-25	UP
4532239	MSMEG_2904	MmcI protein	NC_008596.1:2967055-2967447	1.49691	0.00093932	0.0022524	UP
4531962	MSMEG_6936	hypothetical protein	NC_008596.1:6979641-6980393	1.4958	3.7e-25	6.56e-24	UP
4535208	algD	GDP-mannose 6-dehydrogenase AlgD	NC_008596.1:6017397-6018887	1.49543	3.57e-13	2.71e-12	UP
4534729	MSMEG_6332	amino acid ABC transporter permease	NC_008596.1:6397505-6398149	1.49459	0.000233116	0.000620801	UP
4535549	MSMEG_1892	transferase	NC_008596.1:1971300-1972799	1.4942	1.87e-24	3.18e-23	UP
4534203	MSMEG_3214	hypothetical protein	NC_008596.1:3292342-3293334	1.49402	9.98e-25	1.72e-23	UP
4537663	MSMEG_6595	hypothetical protein	NC_008596.1:6651395-6652369	1.49115	9.76e-25	1.69e-23	UP
4535234	MSMEG_6893	hypothetical protein	NC_008596.1:6941041-6941307	1.48848	2.18e-11	1.4e-10	UP
4531231	MSMEG_0757	hypothetical protein	NC_008596.1:842208-842702	1.48844	7.13e-25	1.24e-23	UP
4535365	MSMEG_0055	hypothetical protein	NC_008596.1:74600-76177	1.48834	6.64e-20	8.32e-19	UP
4537115	MSMEG_3839	DNA polymerase I	NC_008596.1:3908769-3911495	1.48792	7.53e-26	1.39e-24	UP
4530889	MSMEG_4871	3-hydroxyacyl-CoA dehydrogenase	NC_008596.1:4967796-4968560	1.48684	0.00148796	0.00343061	UP
4536501	MSMEG_0075	hypothetical protein	NC_008596.1:99229-99585	1.48674	0.0138176	0.0261074	UP
4534265	MSMEG_1192	M23 peptidase domain-containing protein	NC_008596.1:1257963-1259165	1.48113	2.92e-05	8.99e-05	UP
4535541	MSMEG_0009	hypothetical protein	NC_008596.1:10184-10276	1.47952	1.16e-16	1.13e-15	UP
4532452	MSMEG_0569	potassium transport flavoprotein	NC_008596.1:644774-646045	1.4781	4.26e-06	1.51e-05	UP
4535172	MSMEG_6920	hypothetical protein	NC_008596.1:6963161-6963529	1.47672	6.46e-25	1.13e-23	UP
4536751	MSMEG_2807	two-component system response regulator	NC_008596.1:2870371-2870862	1.46995	2.35e-07	9.76e-07	UP
4531567	MSMEG_5618	acyl-CoA dehydrogenase	NC_008596.1:5701411-5702439	1.468	1.26e-07	5.47e-07	UP
4532351	MSMEG_6060	permease	NC_008596.1:6127999-6129036	1.46579	7.98e-21	1.07e-19	UP
4536278	MSMEG_0288	FAD dependent oxidoreductase	NC_008596.1:318960-320069	1.4632	4.91e-12	3.31e-11	UP
4534995	MSMEG_0063	PE family protein	NC_008596.1:85248-85541	1.4609	7.49e-23	1.16e-21	UP
4533815	MSMEG_4074	peroxisomal trans-2-enoyl-CoA reductase	NC_008596.1:4146668-4147465	1.46035	0.00736698	0.0147353	UP
4531597	MSMEG_0017	ABC transporter permease	NC_008596.1:15525-17252	1.45712	1.49e-14	1.25e-13	UP
4532911	MSMEG_0059	ATPase AAA	NC_008596.1:77918-79642	1.45642	6.58e-24	1.09e-22	UP
4535000	MSMEG_5624	oxidoreductase, short chain dehydrogenase/reductase	NC_008596.1:5707618-5708538	1.45625	0.00136101	0.00316427	UP
4536872	uvrB	excinuclease ABC subunit B	NC_008596.1:3885360-3887570	1.45193	8.76e-25	1.52e-23	UP
4532047	MSMEG_2094	56kDa selenium binding protein	NC_008596.1:2169678-2171087	1.45131	1.28e-21	1.81e-20	UP
4533345	MSMEG_5755	tRNA	NC_008596.1:5834094-5834167	1.44966	2.6e-05	8.09e-05	UP
4535310	MSMEG_0514	alpha-galactosidase	NC_008596.1:594088-595401	1.44966	2.6e-05	8.09e-05	UP
4531896	MSMEG_6620	hypothetical protein	NC_008596.1:6674114-6674437	1.44903	1.77e-23	2.87e-22	UP
4533380	MSMEG_6870	creatinine amidohydrolase	NC_008596.1:6918823-6919647	1.44829	5.49e-06	1.91e-05	UP
4535537	radA	DNA repair protein RadA	NC_008596.1:6142417-6143817	1.44672	2.28e-24	3.86e-23	UP
4532877	MSMEG_5827	glyoxalase	NC_008596.1:5894923-5895273	1.44355	1.93e-23	3.11e-22	UP
4531919	MSMEG_2872	short-chain dehydrogenase/reductase SDR	NC_008596.1:2933753-2934544	1.44249	0.000791084	0.00191282	UP
4532182	MSMEG_3157	hypothetical protein	NC_008596.1:3231067-3231804	1.44235	3.89e-23	6.15e-22	UP
4533846	MSMEG_2402	dihydroxyacetone kinase	NC_008596.1:2482984-2484648	1.44154	5.81e-23	9.04e-22	UP
4532279	MSMEG_6923	hypothetical protein	NC_008596.1:6965572-6966345	1.44059	1.16e-22	1.76e-21	UP
4531786	MSMEG_1338	tRNA	NC_008596.1:1436094-1436167	1.43897	4.1e-12	2.8e-11	UP
4531205	MSMEG_6364	pseudo	NC_008596.1:6420806-6421196	1.43877	6.78e-17	6.79e-16	UP
4533404	MSMEG_6594	amino acid ABC transporter permease	NC_008596.1:6650515-6651408	1.43747	1.1e-21	1.56e-20	UP
4536961	ruvB	Holliday junction DNA helicase RuvB	NC_008596.1:3005439-3006494	1.43715	1.18e-23	1.94e-22	UP
4535091	MSMEG_0723	hypothetical protein	NC_008596.1:811187-811729	1.43406	2.13e-07	8.93e-07	UP
4533428	MSMEG_6899	hypothetical protein	NC_008596.1:6943954-6945618	1.4318	1.9e-22	2.83e-21	UP
4536484	MSMEG_2837	nitrate reductase NarB	NC_008596.1:2896046-2898433	1.42737	3.83e-12	2.63e-11	UP
4531650	MSMEG_2215	AMP-binding protein	NC_008596.1:2294995-2296497	1.42599	3.71e-06	1.32e-05	UP
4536123	MSMEG_5621	acyl-CoA dehydrogenase	NC_008596.1:5704384-5705304	1.42594	0.0034889	0.00744911	UP
4531565	MSMEG_6928	hypothetical protein	NC_008596.1:6969396-6971798	1.42127	1.53e-22	2.29e-21	UP
4531021	MSMEG_0510	D-tagatose-bisphosphate aldolase non-catalytic subunit	NC_008596.1:589666-590988	1.41976	0.000722865	0.00176003	UP
4535446	MSMEG_1533	subtilase	NC_008596.1:1622024-1623352	1.41973	5.22e-05	0.000155235	UP
4537624	MSMEG_5801	hydroxylase	NC_008596.1:5869361-5870710	1.4135	6.76e-11	4.18e-10	UP
4534405	MSMEG_6701	amino acid permease	NC_008596.1:6750984-6752480	1.41134	5.13e-07	2.04e-06	UP
4531496	MSMEG_6925	hypothetical protein	NC_008596.1:6966439-6966936	1.41127	8.86e-18	9.7e-17	UP
4536305	MSMEG_5876	H-N-H endonuclease F-TflIV	NC_008596.1:5938086-5938424	1.41114	1.2e-17	1.29e-16	UP
4534166	MSMEG_1313	hypothetical protein	NC_008596.1:1406859-1409201	1.41017	6.54e-22	9.39e-21	UP
4531306	MSMEG_1988	hypothetical protein	NC_008596.1:2070610-2071146	1.40853	3.66e-07	1.48e-06	UP
4535677	MSMEG_6048	cobalamin synthesis protein/P47K	NC_008596.1:6115172-6116308	1.40803	4.62e-08	2.1e-07	UP
4537565	MSMEG_0060	hypothetical protein	NC_008596.1:79650-81089	1.40637	6.3e-22	9.08e-21	UP
4535900	MSMEG_6714	hypothetical protein	NC_008596.1:6762451-6763068	1.40589	0.0106133	0.0205915	UP
4533446	MSMEG_1877	hypothetical protein	NC_008596.1:1954646-1955299	1.40491	1.61e-17	1.71e-16	UP
4534883	MSMEG_0458	two-component system sensor kinase	NC_008596.1:534392-535687	1.40169	5.76e-17	5.83e-16	UP
4531294	trx	thioredoxin	NC_008596.1:6977934-6978266	1.39859	3.39e-23	5.37e-22	UP
4533259	MSMEG_1962	hypothetical protein	NC_008596.1:2041993-2042538	1.39827	7.19e-16	6.68e-15	UP
4532938	MSMEG_5507	hypothetical protein	NC_008596.1:5590921-5592249	1.39827	2.03e-08	9.65e-08	UP
4533554	MSMEG_5759	PE family protein	NC_008596.1:5834677-5835828	1.39335	7.33e-16	6.79e-15	UP
4536808	MSMEG_1891	hypothetical protein	NC_008596.1:1970515-1971303	1.39283	1.08e-21	1.54e-20	UP
4534971	MSMEG_6325	hypothetical protein	NC_008596.1:6393250-6393789	1.39149	5.78e-08	2.6e-07	UP
4532321	MSMEG_5917	hypothetical protein	NC_008596.1:5976871-5977719	1.39133	2.53e-12	1.76e-11	UP
4535857	MSMEG_4092	alkanal monooxygenase	NC_008596.1:4168736-4169806	1.39048	6.61e-14	5.32e-13	UP
4535545	MSMEG_6390	transporter major facilitator family protein	NC_008596.1:6453932-6455158	1.38808	6.19e-16	5.76e-15	UP
4537393	MSMEG_6367	glycosyl transferase family protein	NC_008596.1:6422538-6423446	1.38616	8.38e-22	1.2e-20	UP
4535733	MSMEG_2421	hypothetical protein	NC_008596.1:2502168-2502587	1.38519	3.01e-21	4.15e-20	UP
4532300	MSMEG_4873	enoyl-CoA hydratase/isomerase	NC_008596.1:4969432-4970190	1.381	0.0175245	0.0322138	UP
4532931	MSMEG_6751	hypothetical protein	NC_008596.1:6796078-6796293	1.37677	2.23e-09	1.19e-08	UP
4535307	MSMEG_0087	glucitol operon repressor	NC_008596.1:110826-111593	1.37196	2.98e-15	2.65e-14	UP
4531971	MSMEG_3734	tRNA	NC_008596.1:3800546-3800622	1.37138	0.00282162	0.00613521	UP
4534794	MSMEG_5006	phosphohistidine phosphatase	NC_008596.1:5103405-5103905	1.36993	1.58e-20	2.08e-19	UP
4534850	MSMEG_2840	hypothetical protein	NC_008596.1:2901404-2902102	1.36901	1.86e-20	2.42e-19	UP
4537704	MSMEG_6247	hypothetical protein	NC_008596.1:6312599-6313564	1.36817	1.18e-21	1.67e-20	UP
4536171	MSMEG_2216	AMP-binding protein	NC_008596.1:2296490-2297974	1.36449	0.000546117	0.00135957	UP
4537352	MSMEG_0065	hypothetical protein	NC_008596.1:86997-87299	1.36231	1.94e-21	2.7e-20	UP
4532834	MSMEG_6593	ATP-binding protein	NC_008596.1:6649755-6650522	1.36211	3.82e-19	4.6e-18	UP
4534949	MSMEG_3809	hypothetical protein	NC_008596.1:3877122-3877925	1.36173	1.51e-19	1.86e-18	UP
4535981	MSMEG_0572	hypothetical protein	NC_008596.1:647243-647764	1.35478	1.59e-07	6.77e-07	UP
4534051	MSMEG_1765	restriction endonuclease	NC_008596.1:1856508-1857038	1.35053	6.09e-18	6.77e-17	UP
4535193	MSMEG_6607	hypothetical protein	NC_008596.1:6661240-6662100	1.34935	1.7e-09	9.15e-09	UP
4532762	MSMEG_4400	alcohol dehydrogenase	NC_008596.1:4489984-4491054	1.34518	1.65e-20	2.16e-19	UP
4533109	MSMEG_5490	hypothetical protein	NC_008596.1:5570784-5572490	1.34312	3.96e-12	2.72e-11	UP
4535654	MSMEG_1301	hypothetical protein	NC_008596.1:1394284-1394544	1.34083	1.02e-16	9.96e-16	UP
4535718	MSMEG_6116	OHCU decarboxylase	NC_008596.1:6177612-6178142	1.34042	5.06e-21	6.93e-20	UP
4533797	MSMEG_6591	class V aminotransferase	NC_008596.1:6648028-6649758	1.33795	1.78e-20	2.32e-19	UP
4536352	MSMEG_4013	oxidoreductase	NC_008596.1:4087035-4088054	1.33677	9.37e-07	3.6e-06	UP
4533401	MSMEG_2404	extracellular deoxyribonuclease	NC_008596.1:2486903-2487607	1.33654	2.15e-14	1.8e-13	UP
4530987	MSMEG_3817	hypothetical protein	NC_008596.1:3887653-3888093	1.33348	6.92e-14	5.54e-13	UP
4531747	MSMEG_4349	hypothetical protein	NC_008596.1:4435960-4437738	1.33021	1.27e-19	1.58e-18	UP
4536067	MSMEG_6723	hypothetical protein	NC_008596.1:6770504-6771022	1.32815	1.14e-17	1.23e-16	UP
4531339	MSMEG_2557	TetR family transcriptional regulator	NC_008596.1:2642079-2642627	1.32697	0.00403509	0.00852551	UP
4533083	MSMEG_2219	enoyl-CoA hydratase/isomerase	NC_008596.1:2300197-2301003	1.32578	2.83e-12	1.97e-11	UP
4532993	MSMEG_1330	MarR family transcriptional regulator	NC_008596.1:1429855-1430313	1.32476	4.79e-16	4.51e-15	UP
4536195	MSMEG_2890	transcriptional regulator	NC_008596.1:2953144-2954040	1.32287	0.013179	0.0249937	UP
4533642	MSMEG_3245	tRNA	NC_008596.1:3328690-3328766	1.32021	3.62e-06	1.29e-05	UP
4531312	MSMEG_6929	hypothetical protein	NC_008596.1:6971795-6975445	1.31761	1.04e-20	1.39e-19	UP
4533067	MSMEG_6059	hypothetical protein	NC_008596.1:6127628-6127912	1.31736	1.87e-18	2.14e-17	UP
4532169	MSMEG_0488	ABC transporter ATP-binding protein	NC_008596.1:567784-568551	1.31542	2.36e-06	8.66e-06	UP
4533433	MSMEG_4075	CoA-binding protein	NC_008596.1:4147462-4149525	1.30919	5.86e-07	2.31e-06	UP
4532092	MSMEG_3404	HNH endonuclease domain-containing protein	NC_008596.1:3477089-3478327	1.30786	1.81e-20	2.36e-19	UP
4533675	MSMEG_4800	3-oxoacyl-ACP reductase	NC_008596.1:4900364-4901065	1.30756	0.00358721	0.00763503	UP
4536583	MSMEG_0297	amidohydrolase	NC_008596.1:327678-328937	1.30756	0.00358721	0.00763503	UP
4537289	MSMEG_2220	enoyl-CoA hydratase/isomerase	NC_008596.1:2301024-2301845	1.30756	0.00358721	0.00763503	UP
4532864	MSMEG_3908	hypothetical protein	NC_008596.1:3979406-3980203	1.3048	5.03e-20	6.36e-19	UP
4533728	MSMEG_4460	acetolactate synthase	NC_008596.1:4540344-4541966	1.30428	9.26e-09	4.57e-08	UP
4537578	MSMEG_1086	ABC transporter permease	NC_008596.1:1150289-1151224	1.30042	0.00650712	0.0131188	UP
4535800	MSMEG_2725	glutamate transporter permease GluD	NC_008596.1:2794005-2794904	1.29751	7.92e-20	9.89e-19	UP
4531114	MSMEG_4678	hypothetical protein	NC_008596.1:4764745-4765266	1.29647	3.29e-13	2.51e-12	UP
4530882	MSMEG_0031	penicillin binding protein transpeptidase domain-containing protein	NC_008596.1:51381-52856	1.29274	1.12e-19	1.39e-18	UP
4533709	MSMEG_1309	hypothetical protein	NC_008596.1:1402155-1402271	1.29049	0.000942921	0.00225941	UP
4534960	glmS	glucosamine--fructose-6-phosphate aminotransferase	NC_008596.1:6050802-6052589	1.29047	6.2e-06	2.14e-05	UP
4533756	MSMEG_2188	integral membrane protein	NC_008596.1:2267604-2268578	1.28925	1.1e-19	1.37e-18	UP
4536082	MSMEG_2232	amidohydrolase	NC_008596.1:2310740-2311594	1.28728	9.18e-06	3.07e-05	UP
4532129	MSMEG_1942	integral membrane protein	NC_008596.1:2023699-2024412	1.28686	1.98e-18	2.26e-17	UP
4533214	MSMEG_6348	hypothetical protein	NC_008596.1:6409714-6410292	1.28652	1.27e-07	5.48e-07	UP
4535025	MSMEG_0853	hypothetical protein	NC_008596.1:936855-937103	1.28618	0.00012925	0.000359617	UP
4535670	MSMEG_0505	sugar ABC transporter substrate-binding protein	NC_008596.1:584410-585780	1.28004	1.13e-15	1.03e-14	UP
4534635	MSMEG_4541	ABC transporter ATP-binding protein	NC_008596.1:4630773-4632392	1.27984	4.47e-05	0.000134053	UP
4533496	MSMEG_2231	acyl-CoA synthetase	NC_008596.1:2309115-2310743	1.27902	0.000847923	0.00204208	UP
4532085	MSMEG_3813	NAD-dependent epimerase/dehydratase	NC_008596.1:3883219-3883497	1.27798	0.000118509	0.000332094	UP
4532706	MSMEG_0064	PPE family protein	NC_008596.1:85616-86911	1.27742	5.13e-19	6.14e-18	UP
4535891	MSMEG_2176	hypothetical protein	NC_008596.1:2253121-2253447	1.2757	1.05e-17	1.14e-16	UP
4532737	MSMEG_2832	hypothetical protein	NC_008596.1:2894648-2894974	1.27368	2.74e-12	1.91e-11	UP
4531976	MSMEG_1166	tRNA	NC_008596.1:1228393-1228478	1.27253	0.000189421	0.000513282	UP
4535823	MSMEG_0450	hypothetical protein	NC_008596.1:525004-525219	1.27135	1.21e-05	3.96e-05	UP
4531052	recQ	ATP-dependent DNA helicase RecQ	NC_008596.1:5476470-5477615	1.26846	6.38e-05	0.000186955	UP
4535603	MSMEG_4803	cytochrome P450	NC_008596.1:4902298-4903659	1.26843	7.95e-07	3.07e-06	UP
4533116	MSMEG_1540	ATP-dependent RNA helicase	NC_008596.1:1630283-1631665	1.2647	1.8e-19	2.21e-18	UP
4534959	MSMEG_2812	C-5 sterol desaturase	NC_008596.1:2874564-2875436	1.26308	9.97e-05	0.000282549	UP
4533863	pepN	aminopeptidase	NC_008596.1:4774721-4777303	1.26305	1.38e-19	1.71e-18	UP
4531467	MSMEG_1814	hypothetical protein	NC_008596.1:1890327-1890539	1.26193	0.00251484	0.00553332	UP
4533609	MSMEG_5451	alkylated DNA repair protein	NC_008596.1:5536101-5536697	1.2613	4.15e-16	3.93e-15	UP
4536757	MSMEG_5860	TetR family transcriptional regulator	NC_008596.1:5926686-5927285	1.25771	0.000279253	0.000734545	UP
4533238	pcrA	ATP-dependent DNA helicase PcrA	NC_008596.1:5622802-5625153	1.25769	2.3e-19	2.79e-18	UP
4534234	MSMEG_5724	MarR family transcriptional regulator	NC_008596.1:5807649-5808116	1.25722	9.74e-11	5.94e-10	UP
4534494	MSMEG_0033	protein phosphatase 2C	NC_008596.1:54265-55803	1.25424	5.38e-19	6.42e-18	UP
4532693	MSMEG_0369	hypothetical protein	NC_008596.1:409979-410701	1.25392	7.33e-18	8.09e-17	UP
4530869	MSMEG_4256	NLP/P60 family protein	NC_008596.1:4339480-4340625	1.25204	3.84e-19	4.62e-18	UP
4535346	MSMEG_5661	ABC transporter ATP-binding protein	NC_008596.1:5753419-5755335	1.25153	1.19e-17	1.28e-16	UP
4537398	MSMEG_6604	TetR family transcriptional regulator	NC_008596.1:6659918-6660517	1.2515	3.3e-13	2.51e-12	UP
4531877	MSMEG_1322	ErfK/YbiS/YcfS/YnhG family protein	NC_008596.1:1418115-1419377	1.24999	7.73e-19	9.09e-18	UP
4535676	MSMEG_4787	virulence factor mce family protein	NC_008596.1:4888227-4889687	1.24985	2.39e-05	7.49e-05	UP
4532269	MSMEG_3136	heme peroxidase superfamily protein	NC_008596.1:3209887-3210606	1.24822	2.76e-13	2.13e-12	UP
4534310	MSMEG_2422	acylphosphatase	NC_008596.1:2502584-2502880	1.24642	4.5e-15	3.95e-14	UP
4532333	MSMEG_2847	extracellular solute-binding protein	NC_008596.1:2909734-2911320	1.24201	1.79e-06	6.66e-06	UP
4534331	MSMEG_6896	single-stranded DNA-binding protein	NC_008596.1:6942354-6942851	1.24096	6.98e-19	8.24e-18	UP
4535340	MSMEG_0422	transferase	NC_008596.1:497010-497777	1.24012	2.28e-18	2.6e-17	UP
4531677	MSMEG_5387	hypothetical protein	NC_008596.1:5465768-5466640	1.23973	1.29e-05	4.2e-05	UP
4534201	MSMEG_6199	transcription factor WhiB	NC_008596.1:6266743-6267099	1.23949	6.03e-10	3.42e-09	UP
4535438	MSMEG_2884	cyclohexanone monooxygenase	NC_008596.1:2947132-2949054	1.23936	4.66e-08	2.12e-07	UP
4536508	MSMEG_4422	oxidoreductase	NC_008596.1:4504237-4505727	1.23626	7.53e-07	2.92e-06	UP
4530883	MSMEG_3907	recombinase B	NC_008596.1:3978534-3979409	1.2349	2.75e-18	3.11e-17	UP
4531828	MSMEG_5158	sensor histidine kinase	NC_008596.1:5259912-5261111	1.23279	5.23e-16	4.92e-15	UP
4535625	MSMEG_5815	betaine aldehyde dehydrogenase	NC_008596.1:5880390-5881853	1.23226	1.03e-12	7.45e-12	UP
4531949	ppa	inorganic pyrophosphatase	NC_008596.1:6177063-6177551	1.2307	1.49e-18	1.71e-17	UP
4536810	MSMEG_6597	hydrolase of the alpha/beta superfamily protein	NC_008596.1:6653552-6654313	1.22938	1.29e-14	1.1e-13	UP
4533875	MSMEG_5000	LysR family transcriptional regulator	NC_008596.1:5097849-5098754	1.22466	1.43e-14	1.21e-13	UP
4534298	MSMEG_1270	hypothetical protein	NC_008596.1:1359598-1359891	1.2244	7.81e-15	6.74e-14	UP
4534899	MSMEG_1362	hypothetical protein	NC_008596.1:1456715-1457314	1.22316	1.21e-09	6.64e-09	UP
4532553	MSMEG_0103	major facilitator family protein transporter	NC_008596.1:125900-127099	1.22236	9.58e-12	6.32e-11	UP
4534895	MSMEG_6836	oxidoreductase	NC_008596.1:6887256-6887666	1.22011	0.00157425	0.00361701	UP
4531100	nuoH	NADH dehydrogenase subunit H	NC_008596.1:2134406-2135632	1.22006	0.000307794	0.000802317	UP
4536417	MSMEG_6468	hypothetical protein	NC_008596.1:6533466-6534350	1.21798	4.95e-17	5.02e-16	UP
4533174	MSMEG_4080	pseudo	NC_008596.1:4153904-4154781	1.21776	2.51e-05	7.84e-05	UP
4536782	MSMEG_0175	FAD dependent oxidoreductase	NC_008596.1:199157-200293	1.21727	4.4e-07	1.76e-06	UP
4534806	MSMEG_5262	hypothetical protein	NC_008596.1:5354473-5354901	1.21554	4.34e-16	4.09e-15	UP
4537550	MSMEG_4572	hypothetical protein	NC_008596.1:4663655-4664614	1.21482	6.32e-18	7.01e-17	UP
4534767	MSMEG_0909	acyl-ACP thioesterase	NC_008596.1:994104-994952	1.21129	1.7e-17	1.8e-16	UP
4533127	MSMEG_2861	hypothetical protein	NC_008596.1:2924650-2925162	1.20803	0.0062333	0.0126511	UP
4536716	MSMEG_4821	hypothetical protein	NC_008596.1:4918894-4919184	1.20802	1.27e-05	4.13e-05	UP
4533124	MSMEG_5089	hypothetical protein	NC_008596.1:5188843-5191101	1.20784	3.15e-17	3.25e-16	UP
4534712	MSMEG_6724	cobalt ABC transporter	NC_008596.1:6771009-6771791	1.20663	8.89e-17	8.74e-16	UP
4537215	MSMEG_6622	cytochrome P450 monooxygenase	NC_008596.1:6675471-6676661	1.20651	4.93e-12	3.33e-11	UP
4531759	MSMEG_0023	hypothetical protein	NC_008596.1:44692-45102	1.20636	2.32e-17	2.42e-16	UP
4532723	MSMEG_6153	DNA polymerase III subunit delta'	NC_008596.1:6221127-6222335	1.20628	1.45e-17	1.55e-16	UP
4535322	MSMEG_0866	DNA or RNA helicase of superfamily protein II	NC_008596.1:949606-951312	1.20561	6.82e-18	7.55e-17	UP
4533311	MSMEG_4450	alpha/beta hydrolase	NC_008596.1:4530136-4531071	1.20336	2.78e-15	2.48e-14	UP
4534000	MSMEG_0046	hypothetical protein	NC_008596.1:66010-67167	1.20331	2.93e-16	2.81e-15	UP
4537622	MSMEG_2244	Rieske (2Fe-2S) domain-containing protein	NC_008596.1:2326291-2327307	1.20254	0.000230122	0.000614059	UP
4532541	hypB	hydrogenase nickel incorporation protein HypB	NC_008596.1:2791028-2791807	1.20145	3.27e-05	0.000100085	UP
4537652	MSMEG_2397	AsnC family transcriptional regulator	NC_008596.1:2480097-2480333	1.20106	4.22e-15	3.71e-14	UP
4532202	MSMEG_0015	ferric enterobactin transport ATP-binding protein FepC	NC_008596.1:13310-14140	1.19875	2.05e-13	1.6e-12	UP
4532920	MSMEG_2061	NADH dehydrogenase subunit C	NC_008596.1:2141556-2142272	1.19739	0.00240822	0.00532516	UP
4533999	MSMEG_2889	NADH:flavin oxidoreductase	NC_008596.1:2951016-2952254	1.19739	0.00240822	0.00532516	UP
4531899	MSMEG_5348	medium-chain fatty acid-CoA ligase	NC_008596.1:5431409-5433004	1.19738	0.000110782	0.000311757	UP
4532554	MSMEG_0123	hypothetical protein	NC_008596.1:144542-145048	1.19735	0.013179	0.0249937	UP
4532461	MSMEG_0220	monoglyceride lipase	NC_008596.1:246357-247199	1.19557	2.75e-16	2.64e-15	UP
4533758	MSMEG_0032	cell cycle protein, FtsW/RodA/SpoVE family protein	NC_008596.1:52853-54268	1.19529	3.1e-17	3.21e-16	UP
4536386	MSMEG_0849	oxygenase	NC_008596.1:933768-934085	1.19497	9.87e-10	5.48e-09	UP
4536937	MSMEG_0052	hypothetical protein	NC_008596.1:70911-71690	1.19495	1.09e-16	1.06e-15	UP
4532458	MSMEG_6726	ABC transporter permease	NC_008596.1:6773260-6773889	1.19492	3.32e-17	3.42e-16	UP
4533889	MSMEG_0370	hypothetical protein	NC_008596.1:410691-414047	1.19429	1.07e-17	1.16e-16	UP
4534465	MSMEG_6931	RNA polymerase sigma-70 factor	NC_008596.1:6975546-6976172	1.18498	1.46e-11	9.44e-11	UP
4535988	gyrA	DNA gyrase subunit A	NC_008596.1:6648-9176	1.1814	1.53e-17	1.63e-16	UP
4531510	gyrB	DNA gyrase subunit B	NC_008596.1:4591-6618	1.17654	2.04e-17	2.16e-16	UP
4535902	MSMEG_3662	mannose-binding lectin	NC_008596.1:3727672-3728298	1.17592	1.02e-16	1e-15	UP
4531594	MSMEG_5850	TetR family transcriptional regulator	NC_008596.1:5916780-5917400	1.17575	2.08e-14	1.74e-13	UP
4531893	MSMEG_6938	ParB-like partition proteins	NC_008596.1:6980632-6981687	1.17449	7.1e-17	7.1e-16	UP
4534924	MSMEG_4099	ABC transporter permease	NC_008596.1:4177170-4178078	1.17041	1.67e-05	5.36e-05	UP
4534759	MSMEG_6378	senescence marker protein-30	NC_008596.1:6431722-6432624	1.17037	0.00111754	0.00263509	UP
4533290	MSMEG_1434	hypothetical protein	NC_008596.1:1536028-1536393	1.16862	2.15e-08	1.02e-07	UP
4531772	MSMEG_2946	transmembrane protein	NC_008596.1:3006499-3006885	1.16825	5.8e-13	4.29e-12	UP
4536469	MSMEG_6395	hypothetical protein	NC_008596.1:6465494-6465967	1.16759	6.21e-16	5.78e-15	UP
4533587	MSMEG_4094	acyl-CoA dehydrogenase	NC_008596.1:4170932-4172143	1.16493	4.6e-09	2.36e-08	UP
4533346	MSMEG_3814	tRNA	NC_008596.1:3883645-3883718	1.16174	4.7e-05	0.000140531	UP
4531303	MSMEG_5185	enoyl-CoA hydratase	NC_008596.1:5284871-5285698	1.16111	4.71e-15	4.12e-14	UP
4536866	ssuD	nitrilotriacetate monooxygenase component A	NC_008596.1:2904914-2906269	1.15914	1.08e-06	4.11e-06	UP
4534705	MSMEG_0176	glutamine ABC transporter periplasmic protein	NC_008596.1:200304-201158	1.15872	0.00288333	0.00625099	UP
4536013	MSMEG_4845	acyl-CoA dehydrogenase	NC_008596.1:4940496-4941302	1.15872	0.00288333	0.00625099	UP
4531871	MSMEG_0364	hypothetical protein	NC_008596.1:404569-404868	1.15863	3.79e-14	3.12e-13	UP
4536987	lpdA	pseudo	NC_008596.1:4527310-4528722	1.1578	0.000110782	0.000311757	UP
4535950	MSMEG_1236	Mpr protein	NC_008596.1:1306698-1307345	1.15765	9.09e-16	8.34e-15	UP
4534840	MSMEG_6903	PadR family transcriptional regulator	NC_008596.1:6949596-6950150	1.15758	5.9e-16	5.51e-15	UP
4533557	MSMEG_4844	acyl-CoA dehydrogenase	NC_008596.1:4939369-4940490	1.15291	0.00254729	0.00559546	UP
4532752	MSMEG_0164	transmembrane transporter	NC_008596.1:188427-189770	1.1503	3.41e-05	0.000104022	UP
4532900	MSMEG_0061	ftsk/SpoIIIE family protein	NC_008596.1:81089-83317	1.15014	5.61e-16	5.26e-15	UP
4537722	MSMEG_6789	GntR family transcriptional regulator	NC_008596.1:6837064-6837840	1.14915	8.08e-12	5.36e-11	UP
4532039	MSMEG_2190	acyl-CoA dehydrogenase	NC_008596.1:2268648-2269790	1.14772	3.61e-09	1.88e-08	UP
4532336	MSMEG_5003	O-methyltransferase, family protein 3	NC_008596.1:5098832-5099509	1.14529	1.33e-14	1.14e-13	UP
4531207	pknA	serine/threonine protein kinase	NC_008596.1:50090-51349	1.14416	3.99e-16	3.79e-15	UP
4534091	MSMEG_6854	3-isopropylmalate dehydratase large subunit	NC_008596.1:6902850-6904118	1.14291	0.000579311	0.00143575	UP
4536825	MSMEG_6200	hypothetical protein	NC_008596.1:6267234-6267377	1.14288	0.0185814	0.0338943	UP
4533037	rplI	50S ribosomal protein L9	NC_008596.1:6941588-6942043	1.13609	2.61e-16	2.52e-15	UP
4534172	MSMEG_0125	integral membrane protein	NC_008596.1:145067-146593	1.13597	0.000469484	0.00118701	UP
4530846	MSMEG_0721	pseudo	NC_008596.1:809823-810451	1.13298	9.5e-13	6.89e-12	UP
4536648	MSMEG_2554	phosphotransferase enzyme family protein	NC_008596.1:2637892-2639031	1.13233	1.97e-14	1.65e-13	UP
4530886	MSMEG_2184	amino acid permease	NC_008596.1:2260965-2262506	1.13181	0.00441808	0.00923491	UP
4533321	MSMEG_1263	hypothetical protein	NC_008596.1:1352309-1352833	1.13075	9.25e-11	5.67e-10	UP
4534507	MSMEG_1539	hypothetical protein	NC_008596.1:1629917-1630213	1.12892	5.16e-11	3.22e-10	UP
4531847	MSMEG_6049	hypothetical protein	NC_008596.1:6116358-6117524	1.12888	1.09e-11	7.12e-11	UP
4537618	MSMEG_6883	pseudo	NC_008596.1:6930866-6931293	1.127	0.00388083	0.00822048	UP
4531979	MSMEG_6152	tRNA	NC_008596.1:6220991-6221063	1.12698	0.0138176	0.0261074	UP
4531317	fabG	3-ketoacyl-ACP reductase	NC_008596.1:5963654-5964604	1.12646	2.46e-15	2.21e-14	UP
4531540	MSMEG_6516	hypothetical protein	NC_008596.1:6579893-6580066	1.12431	0.000312439	0.000813148	UP
4530937	MSMEG_2896	hypothetical protein	NC_008596.1:2960097-2960960	1.12428	2.89e-14	2.4e-13	UP
4534355	MSMEG_6921	hypothetical protein	NC_008596.1:6963530-6964135	1.12295	1.1e-15	1.01e-14	UP
4531858	MSMEG_4202	hypothetical protein	NC_008596.1:4279122-4280453	1.12055	9.03e-08	3.97e-07	UP
4531514	MSMEG_6123	ABC transporter	NC_008596.1:6185038-6185967	1.12054	0.0119491	0.0229222	UP
4535268	MSMEG_5127	hypothetical protein	NC_008596.1:5228643-5229797	1.11974	5.18e-15	4.52e-14	UP
4535201	MSMEG_6115	phosphoglycerate dehydrogenase	NC_008596.1:6178118-6179122	1.11744	8.03e-12	5.33e-11	UP
4531522	narI	respiratory nitrate reductase subunit gamma	NC_008596.1:5237887-5238618	1.11707	0.000120012	0.00033574	UP
4533659	MSMEG_1653	hypothetical protein	NC_008596.1:1748300-1748419	1.11558	9.27e-14	7.35e-13	UP
4531872	MSMEG_6939	Soj family protein	NC_008596.1:6981747-6982718	1.11386	2.44e-15	2.19e-14	UP
4532725	MSMEG_0868	hypothetical protein	NC_008596.1:951585-955409	1.11358	4.58e-06	1.61e-05	UP
4536621	MSMEG_0066	early secretory antigenic target, 6 kDa	NC_008596.1:87331-87618	1.11321	3.33e-15	2.95e-14	UP
4530878	MSMEG_3049	hypothetical protein	NC_008596.1:3124455-3124661	1.11149	0.00177118	0.0040181	UP
4532314	MSMEG_1701	purine nucleoside phosphorylase	NC_008596.1:1794381-1795175	1.1083	6.69e-13	4.91e-12	UP
4536971	MSMEG_0657	Rieske (2Fe-2S) domain-containing protein	NC_008596.1:738064-739248	1.10587	1.46e-09	7.95e-09	UP
4537697	MSMEG_2996	hypothetical protein	NC_008596.1:3063126-3063980	1.10545	0.00781752	0.0155507	UP
4537523	MSMEG_1082	response regulator	NC_008596.1:1146756-1147487	1.10544	2.45e-06	8.96e-06	UP
4536730	MSMEG_1273	hypothetical protein	NC_008596.1:1362036-1362377	1.10543	1.24e-06	4.68e-06	UP
4532293	MSMEG_6725	ABC transporter ATP-binding protein	NC_008596.1:6771788-6773263	1.10158	3.59e-15	3.17e-14	UP
4535643	MSMEG_1448	integral membrane transporter	NC_008596.1:1543640-1545139	1.09937	7.66e-15	6.62e-14	UP
4533907	MSMEG_6437	copper resistance protein D	NC_008596.1:6503688-6504617	1.09804	2.36e-11	1.5e-10	UP
4535774	MSMEG_1237	hypothetical protein	NC_008596.1:1307514-1307831	1.09739	4.16e-14	3.4e-13	UP
4531600	MSMEG_1275	HNH nuclease	NC_008596.1:1363745-1364824	1.09561	4.64e-10	2.66e-09	UP
4533115	MSMEG_6887	amidohydrolase	NC_008596.1:6934366-6935613	1.0949	6.78e-11	4.19e-10	UP
4534935	MSMEG_0077	hypothetical protein	NC_008596.1:101776-102093	1.09388	2.22e-12	1.56e-11	UP
4535229	MSMEG_0739	spou rRNA methylase	NC_008596.1:825815-826459	1.09381	4.01e-11	2.53e-10	UP
4536443	MSMEG_0420	hypothetical protein	NC_008596.1:496449-496745	1.09158	0.000713868	0.00174004	UP
4537348	MSMEG_0043	extradiol ring-cleavage dioxygenase, class III enzyme, subunit B	NC_008596.1:60479-61303	1.09009	6.66e-14	5.35e-13	UP
4536979	MSMEG_4573	competence protein	NC_008596.1:4664622-4666136	1.08937	2.17e-05	6.83e-05	UP
4534420	MSMEG_2172	dicarboxylate-carrier protein	NC_008596.1:2248470-2249870	1.0886	4.55e-08	2.07e-07	UP
4535020	MSMEG_6790	AP endonuclease, family protein 2	NC_008596.1:6838029-6838949	1.08635	0.000518754	0.00129972	UP
4531083	MSMEG_5008	ABC transporter ATP-binding protein	NC_008596.1:5105176-5106912	1.08633	2.14e-13	1.66e-12	UP
4537274	cdd	cytidine deaminase	NC_008596.1:1766790-1767176	1.08547	3.18e-08	1.48e-07	UP
4533337	MSMEG_6366	O-antigen export system, ATP-binding protein	NC_008596.1:6421742-6422551	1.08508	7.19e-15	6.23e-14	UP
4531967	MSMEG_2148	HNH endonuclease domain-containing protein	NC_008596.1:2222742-2224376	1.08086	4.62e-05	0.000138325	UP
4535114	MSMEG_2185	hypothetical protein	NC_008596.1:2262515-2263351	1.0799	2.19e-06	8.09e-06	UP
4536504	MSMEG_5526	peptidoglycan-binding LysM	NC_008596.1:5616372-5617415	1.07941	7.35e-15	6.37e-14	UP
4533303	MSMEG_4801	carveol dehydrogenase	NC_008596.1:4901113-4901985	1.07805	0.00163675	0.0037438	UP
4533599	MSMEG_4868	transcriptional regulator	NC_008596.1:4964467-4965192	1.07805	0.0190868	0.0347113	UP
4530969	MSMEG_6369	O-antigen export system, permease	NC_008596.1:6423443-6424273	1.07477	6.18e-14	4.99e-13	UP
4534286	MSMEG_0062	ftsk/SpoIIIE family protein	NC_008596.1:83318-85099	1.07413	4.1e-14	3.37e-13	UP
4532814	MSMEG_5795	4-amino-4-deoxychorismate lyase	NC_008596.1:5862693-5863562	1.07387	9.78e-14	7.74e-13	UP
4537693	MSMEG_1269	Ser/Thr protein phosphatase	NC_008596.1:1358568-1359566	1.07347	3.67e-13	2.78e-12	UP
4534936	rpsR	30S ribosomal protein S18	NC_008596.1:6942062-6942316	1.07073	1.38e-14	1.17e-13	UP
4536207	MSMEG_0720	integral membrane protein	NC_008596.1:808724-809722	1.07025	2.37e-06	8.68e-06	UP
4537684	MSMEG_1431	cytochrome P450-terp	NC_008596.1:1533049-1534344	1.06926	4.67e-08	2.12e-07	UP
4536623	MSMEG_0177	polar amino acid ABC transporter inner membrane protein	NC_008596.1:201116-202087	1.067	0.0105712	0.0205339	UP
4532769	MSMEG_5461	hypothetical protein	NC_008596.1:5544268-5544540	1.06698	0.000666392	0.00163149	UP
4534717	MSMEG_4835	3-oxoacyl-ACP reductase	NC_008596.1:4931885-4932643	1.06589	0.000599194	0.00148241	UP
4536316	MSMEG_1714	L-ribulose-5-phosphate 4-epimerase	NC_008596.1:1810196-1810891	1.06308	0.00797426	0.0158176	UP
4537226	MSMEG_0026	septation inhibitor protein	NC_008596.1:46417-46701	1.06221	4.19e-14	3.42e-13	UP
4532088	MSMEG_0235	hypothetical protein	NC_008596.1:264607-265227	1.06201	5.12e-12	3.44e-11	UP
4536586	MSMEG_4451	monooxygenase	NC_008596.1:4531068-4532780	1.06182	1.03e-12	7.42e-12	UP
4537036	MSMEG_2510	pseudo	NC_008596.1:2595148-2596268	1.06138	0.000192364	0.000520197	UP
4534691	MSMEG_0610	beta-lactamase	NC_008596.1:686934-687842	1.05981	0.00606582	0.0123528	UP
4534542	MSMEG_6003	coenzyme A transferase subunit B	NC_008596.1:6068022-6068771	1.05915	1.62e-06	6.08e-06	UP
4534027	MSMEG_0018	ABC transporter permease	NC_008596.1:17249-19018	1.05846	2.74e-07	1.13e-06	UP
4535755	MSMEG_5717	pyridoxamine 5'-phosphate oxidase	NC_008596.1:5800752-5801177	1.05805	1.36e-12	9.71e-12	UP
4535991	MSMEG_6740	1-aminocyclopropane-1-carboxylate deaminase	NC_008596.1:6786544-6787548	1.05592	4.89e-13	3.65e-12	UP
4531313	MSMEG_6432	hypothetical protein	NC_008596.1:6500009-6500470	1.05585	2.09e-13	1.63e-12	UP
4531394	MSMEG_1710	ribose transporter permease RbsC	NC_008596.1:1804521-1805594	1.05491	0.00273709	0.0059631	UP
4532410	MSMEG_5951	group 1 glycosyl transferase	NC_008596.1:6012352-6013476	1.05391	5.42e-09	2.75e-08	UP
4533085	MSMEG_0735	transcriptional regulator	NC_008596.1:822502-823164	1.0521	4.76e-08	2.16e-07	UP
4531725	MSMEG_4636	hypothetical protein	NC_008596.1:4723973-4724191	1.0521	0.0018996	0.00428457	UP
4532444	MSMEG_1335	BadM/Rrf2 family transcriptional regulator	NC_008596.1:1434167-1434628	1.0521	0.0018996	0.00428457	UP
4533049	MSMEG_5477	2-hydroxy-3-oxopropionate reductase	NC_008596.1:5560599-5561513	1.05129	1.94e-06	7.19e-06	UP
4532098	MSMEG_1960	hypothetical protein	NC_008596.1:2040307-2040828	1.0506	2.04e-10	1.21e-09	UP
4532986	MSMEG_2539	thiopurine S-methyltransferase (tpmt) superfamily protein	NC_008596.1:2624131-2624811	1.04707	7.69e-06	2.61e-05	UP
4537143	bioF	8-amino-7-oxononanoate synthase	NC_008596.1:3269639-3270787	1.0447	1.05e-11	6.9e-11	UP
4533625	MSMEG_6430	hypothetical protein	NC_008596.1:6498318-6500012	1.04438	2.3e-13	1.78e-12	UP
4536664	MSMEG_2841	monooxygenase	NC_008596.1:2902133-2903578	1.04411	1.43e-07	6.16e-07	UP
4534154	MSMEG_0221	hypothetical protein	NC_008596.1:247214-248173	1.04399	4.72e-13	3.53e-12	UP
4536412	MSMEG_6754	MaoC like domain-containing protein	NC_008596.1:6798433-6799461	1.04343	7.49e-14	5.99e-13	UP
4531184	dacB	D-alanyl-D-alanine carboxypeptidase/D-alanyl-D-alanine-endopeptidase	NC_008596.1:6175537-6176979	1.03893	1e-13	7.92e-13	UP
4534361	glgX	glycogen debranching protein GlgX	NC_008596.1:3263798-3265954	1.0374	1.02e-13	7.99e-13	UP
4536613	MSMEG_2732	hypothetical protein	NC_008596.1:2801006-2801893	1.03401	6.77e-12	4.5e-11	UP
4533803	MSMEG_6007	pseudo	NC_008596.1:6071277-6072254	1.03192	3.12e-10	1.81e-09	UP
4537379	MSMEG_5753	serine/threonine specific protein phosphatase	NC_008596.1:5831541-5832110	1.02908	5.78e-11	3.6e-10	UP
4530924	MSMEG_4409	hypothetical protein	NC_008596.1:4497153-4497278	1.02747	0.0165042	0.0305581	UP
4537382	MSMEG_5035	hypothetical protein	NC_008596.1:5130102-5130584	1.02746	0.0142238	0.0267759	UP
4531271	MSMEG_5367	pseudo	NC_008596.1:5445359-5445898	1.02746	0.00153625	0.00353582	UP
4533194	MSMEG_5596	oxidoreductase	NC_008596.1:5684407-5685162	1.02745	0.0223961	0.0402452	UP
4534338	MSMEG_6838	esterase	NC_008596.1:6887818-6888333	1.02745	0.00136929	0.00318128	UP
4536055	MSMEG_4102	hypothetical protein	NC_008596.1:4181131-4182240	1.02744	5.93e-05	0.00017515	UP
4532714	MSMEG_0567	selenophosphate synthetase	NC_008596.1:642290-643711	1.02742	0.000134057	0.000372427	UP
4536877	MSMEG_2230	amidohydrolase	NC_008596.1:2307861-2309111	1.02742	0.00359272	0.0076443	UP
4532979	MSMEG_6683	peroxiredoxin	NC_008596.1:6733486-6733965	1.0274	0.00700666	0.0140747	UP
4537179	thrB	homoserine kinase	NC_008596.1:5051708-5052661	1.01852	2.99e-13	2.29e-12	UP
4537549	MSMEG_4100	ABC transporter permease	NC_008596.1:4178075-4179127	1.01678	2.41e-05	7.55e-05	UP
4536793	MSMEG_6859	oxidoreductase	NC_008596.1:6908449-6909201	1.01654	6.79e-13	4.98e-12	UP
4537210	MSMEG_5794	hypothetical protein	NC_008596.1:5862063-5862440	1.01387	3.02e-13	2.31e-12	UP
4533937	MSMEG_3079	hypothetical protein	NC_008596.1:3152446-3153321	1.0127	3.6e-13	2.73e-12	UP
4533596	MSMEG_1643	hypothetical protein	NC_008596.1:1736549-1738318	1.01249	3.82e-13	2.88e-12	UP
4531570	MSMEG_1511	oxidoreductase	NC_008596.1:1601665-1602363	1.01184	9.28e-11	5.69e-10	UP
4535595	MSMEG_1383	endonuclease IV	NC_008596.1:1485148-1485900	1.01018	2.63e-13	2.03e-12	UP
4532205	MSMEG_2635	ABC transporter permease	NC_008596.1:2716010-2716903	1.00859	1.28e-05	4.19e-05	UP
4536298	MSMEG_0028	serine-threonine protein kinase	NC_008596.1:48216-50093	1.0063	2.8e-13	2.15e-12	UP
4531418	MSMEG_6702	[NADP+] succinate-semialdehyde dehydrogenase	NC_008596.1:6752526-6753908	1.00609	0.00175511	0.00398436	UP
4534421	MSMEG_0365	hypothetical protein	NC_008596.1:404871-406751	1.00547	1.2e-12	8.64e-12	UP
4530820	ehuB	ectoine/hydroxyectoine ABC transporter solute-binding protein	NC_008596.1:3607110-3607949	1.00473	0.00222282	0.00495475	UP
4536022	MSMEG_2857	virulence factor Mce family protein	NC_008596.1:2919429-2920505	1.00473	0.00222282	0.00495475	UP
4534022	ychF	GTP-dependent nucleic acid-binding protein EngD	NC_008596.1:5316318-5317424	1.00457	6.41e-13	4.73e-12	UP
4531867	pntA	NAD(P) transhydrogenase subunit alpha	NC_008596.1:134172-135713	1.00447	5.02e-13	3.74e-12	UP
4535608	MSMEG_0748	ATPase	NC_008596.1:835259-836161	1.00319	0.00283337	0.00615671	UP
4533096	pstS	phosphate ABC transporter substrate-binding protein	NC_008596.1:5854529-5855665	1.00273	1.15e-12	8.25e-12	UP
4531379	MSMEG_5413	exopolyphosphatase	NC_008596.1:5492439-5493389	1.00202	2.84e-12	1.97e-11	UP
4530989	MSMEG_2845	ABC transporter permease	NC_008596.1:2907894-2908766	1.00143	0.00363619	0.00772691	UP
4536726	bioD	dithiobiotin synthetase	NC_008596.1:3270784-3271461	1.00064	9.5e-08	4.16e-07	UP
4537164	MSMEG_0719	flavohemoprotein	NC_008596.1:807543-808682	1.00052	1.15e-10	6.98e-10	UP

## Sheet: Downregulation
gene id	gene name	description	locus	log2FC	Pvalue	Qvalue	updown
4531936	MSMEG_3932	hypothetical protein	NC_008596.1:4000508-4000945	-6.58645	8.43e-225	1.4e-221	DOWN
4532525	MSMEG_3931	[NiFe] hydrogenase subunit beta	NC_008596.1:3999400-4000485	-5.53866	2.15e-158	2.05e-155	DOWN
4535487	MSMEG_3944	two component transcriptional regulatory protein devr	NC_008596.1:4013788-4014441	-5.49235	2.64e-178	2.92e-175	DOWN
4537708	MSMEG_3945	universal stress protein family protein	NC_008596.1:4014443-4015264	-5.3651	2.63e-190	3.49e-187	DOWN
4536385	MSMEG_5364	amidohydrolase	NC_008596.1:5443516-5444469	-5.31423	7.66e-126	2.99e-123	DOWN
4531215	hybC	hydrogenase-2, large subunit	NC_008596.1:2346098-2347705	-5.07042	7.34e-156	6.1e-153	DOWN
4533668	MSMEG_5363	hypothetical protein	NC_008596.1:5442992-5443366	-4.87184	8.59e-149	6.35e-146	DOWN
4533676	MSMEG_0194	serine esterase, cutinase	NC_008596.1:218725-219423	-4.83028	2.08e-144	1.38e-141	DOWN
4533521	hybA	hydrogenase-2, small subunit	NC_008596.1:2345095-2346066	-4.82507	6.39e-127	2.83e-124	DOWN
4531104	MSMEG_5362	hypothetical protein	NC_008596.1:5442231-5442995	-4.73042	1.77e-86	2.61e-84	DOWN
4534789	MSMEG_3937	hypothetical protein	NC_008596.1:4006743-4007213	-4.64489	5.98e-20	7.55e-19	DOWN
4534013	MSMEG_3929	[NiFe] hydrogenase subunit delta	NC_008596.1:3997812-3998570	-4.55167	3.15e-74	3.22e-72	DOWN
4532628	MSMEG_6655	hypothetical protein	NC_008596.1:6709869-6710645	-4.53908	2.03e-106	4.36e-104	DOWN
4537415	MSMEG_3946	transmembrane protein	NC_008596.1:4015330-4015905	-4.45683	3.24e-137	1.8e-134	DOWN
4535306	MSMEG_1788	hypothetical protein	NC_008596.1:1871258-1871512	-4.45173	1.29e-72	1.24e-70	DOWN
4533058	MSMEG_1790	hypothetical protein	NC_008596.1:1871713-1871970	-4.40465	1.12e-81	1.41e-79	DOWN
4536124	MSMEG_2261	hypothetical protein	NC_008596.1:2344455-2345024	-4.38354	7.36e-114	1.96e-111	DOWN
4535796	MSMEG_3940	universal stress protein family protein	NC_008596.1:4008412-4009293	-4.32935	8.26e-111	2.11e-108	DOWN
4531084	MSMEG_6656	hypothetical protein	NC_008596.1:6710711-6712219	-4.29414	2.49e-118	7.2e-116	DOWN
4533706	MSMEG_1682	flavin-containing monooxygenase FMO	NC_008596.1:1774567-1775832	-4.26085	1.33e-127	6.3e-125	DOWN
4532802	MSMEG_3934	phosphoenolpyruvate synthase	NC_008596.1:4001317-4003635	-4.24347	1.54e-118	4.88e-116	DOWN
4537469	MSMEG_6227	PadR family transcriptional regulator	NC_008596.1:6290798-6291538	-4.22509	3.48e-125	1.28e-122	DOWN
4534107	MSMEG_3948	acyltransferase	NC_008596.1:4016065-4017468	-4.1947	7.3e-120	2.43e-117	DOWN
4531182	MSMEG_2264	peptidase M52, hydrogen uptake protein	NC_008596.1:2347746-2348543	-4.18871	2.02e-107	4.48e-105	DOWN
4531283	MSMEG_1681	endoribonuclease L-PSP superfamily protein	NC_008596.1:1774127-1774570	-4.18107	4.01e-101	8.34e-99	DOWN
4533402	MSMEG_1789	hypothetical protein	NC_008596.1:1871520-1871675	-4.15386	2.29e-22	3.4e-21	DOWN
4537660	MSMEG_1786	STAS domain-containing protein	NC_008596.1:1870342-1870770	-4.1231	3.57e-94	6.25e-92	DOWN
4533166	MSMEG_3409	oxidoreductase	NC_008596.1:3482577-3483530	-3.97256	7.59e-96	1.4e-93	DOWN
4534630	MSMEG_2268	hypothetical protein	NC_008596.1:2350076-2350963	-3.86902	4.15e-84	5.63e-82	DOWN
4534038	MSMEG_1680	hypothetical protein	NC_008596.1:1773456-1774130	-3.86633	7.85e-93	1.34e-90	DOWN
4534020	MSMEG_3580	antigen 85-C	NC_008596.1:3641776-3642765	-3.81877	1.68e-118	5.09e-116	DOWN
4536339	MSMEG_5153	hypothetical protein	NC_008596.1:5256973-5257956	-3.78763	1.22e-108	2.79e-106	DOWN
4536089	MSMEG_3943	hypothetical protein	NC_008596.1:4012832-4013794	-3.75107	2.15e-97	4.08e-95	DOWN
4533068	MSMEG_1548	propanediol utilization: dehydratase, medium subunit	NC_008596.1:1638427-1639029	-3.73735	3.48e-72	3.26e-70	DOWN
4533553	MSMEG_3928	[NiFe] hydrogenase subunit alpha	NC_008596.1:3996523-3997815	-3.69212	3.81e-67	3.09e-65	DOWN
4537592	MSMEG_3930	[NiFe] hydrogenase subunit gamma	NC_008596.1:3998571-3999386	-3.6085	1.7e-69	1.47e-67	DOWN
4531542	MSMEG_3933	hypothetical protein	NC_008596.1:4003514-4004869	-3.58539	4.89e-99	9.55e-97	DOWN
4533396	MSMEG_3328	hypothetical protein	NC_008596.1:3406973-3407374	-3.57494	3.52e-78	4.03e-76	DOWN
4531613	MSMEG_1547	glycerol dehydratase large subunit	NC_008596.1:1636718-1638430	-3.5492	6.67e-89	1.01e-86	DOWN
4532949	MSMEG_3330	hypothetical protein	NC_008596.1:3407751-3407924	-3.52994	1.08e-57	6.76e-56	DOWN
4534782	MSMEG_4379	isochorismatase hydrolase	NC_008596.1:4465578-4466222	-3.52301	7.72e-58	4.93e-56	DOWN
4531236	MSMEG_1743	Fatty acid desaturase	NC_008596.1:1835832-1836980	-3.46354	4.6e-101	9.26e-99	DOWN
4535295	MSMEG_1787	RsbW protein	NC_008596.1:1869761-1870345	-3.45713	7.64e-38	2.44e-36	DOWN
4536812	MSMEG_1679	AmiB protein	NC_008596.1:1772302-1773459	-3.44747	1.71e-80	2.06e-78	DOWN
4537095	MSMEG_1546	coenzyme B12-dependent glycerol dehydrogenase small subunit	NC_008596.1:1636280-1636708	-3.41575	8.63e-70	7.54e-68	DOWN
4533586	MSMEG_0171	histone deacetylase superfamily protein	NC_008596.1:196658-197587	-3.39572	1.6e-77	1.77e-75	DOWN
4534261	MSMEG_3329	hypothetical protein	NC_008596.1:3407520-3407699	-3.36205	4.45e-54	2.48e-52	DOWN
4537716	MSMEG_3616	integral membrane protein	NC_008596.1:3679739-3680041	-3.33011	1.09e-77	1.23e-75	DOWN
4532123	MSMEG_3927	peptidase M52, hydrogen uptake protein	NC_008596.1:3996059-3996526	-3.32741	9.9e-31	2.32e-29	DOWN
4534527	MSMEG_6583	antigen 85-C	NC_008596.1:6635047-6636249	-3.3125	2.28e-91	3.7e-89	DOWN
4536388	MSMEG_3941	GAF family protein	NC_008596.1:4009310-4010953	-3.30369	3.54e-79	4.2e-77	DOWN
4536230	MSMEG_1742	oxidoreductase	NC_008596.1:1834732-1835823	-3.29513	8.08e-93	1.34e-90	DOWN
4532992	hypC	hydrogenase assembly chaperone HypC/HupF	NC_008596.1:2783521-2783781	-3.29402	0.0128142	0.0243708	DOWN
4531062	MSMEG_3942	hypothetical protein	NC_008596.1:4011176-4012672	-3.28969	4.12e-90	6.37e-88	DOWN
4532432	cynS	cyanate hydratase	NC_008596.1:5440718-5441167	-3.28845	2.67e-28	5.65e-27	DOWN
4536830	MSMEG_5404	propionate--CoA ligase	NC_008596.1:5482552-5484423	-3.25193	1.04e-75	1.1e-73	DOWN
4536139	MSMEG_3926	cation-transporting ATPase Pma1	NC_008596.1:3993256-3996024	-3.23592	9.49e-74	9.42e-72	DOWN
4535567	MSMEG_3939	universal stress protein family protein	NC_008596.1:4007445-4008236	-3.22554	7.1e-57	4.29e-55	DOWN
4536573	MSMEG_5574	substrate binding protein	NC_008596.1:5662068-5663411	-3.22192	6.77e-57	4.13e-55	DOWN
4531798	MSMEG_4063	amidohydrolase	NC_008596.1:4135328-4136236	-3.19151	3.01e-71	2.71e-69	DOWN
4534692	MSMEG_3327	hypothetical protein	NC_008596.1:3406544-3406639	-3.17238	2.16e-46	9.24e-45	DOWN
4531095	MSMEG_2269	hypothetical protein	NC_008596.1:2350975-2352150	-3.17135	6.64e-69	5.59e-67	DOWN
4537706	MSMEG_1744	hypothetical protein	NC_008596.1:1837050-1837967	-3.16804	1.68e-84	2.32e-82	DOWN
4534068	ald	alanine dehydrogenase	NC_008596.1:2740567-2741682	-3.16012	5.29e-84	7.03e-82	DOWN
4531817	MSMEG_5571	ABC transporter ATP-binding protein	NC_008596.1:5659133-5660218	-3.15863	8.39e-49	3.87e-47	DOWN
4533677	MSMEG_1868	hypothetical protein	NC_008596.1:1943545-1943838	-3.15007	1.08e-23	1.77e-22	DOWN
4537546	MSMEG_6600	transposase	NC_008596.1:6656133-6657125	-3.12428	4.07e-56	2.35e-54	DOWN
4537315	MSMEG_0580	hypothetical protein	NC_008596.1:655294-656088	-3.09594	1.23e-59	8.41e-58	DOWN
4532394	aspA	aspartate ammonia-lyase	NC_008596.1:1770884-1772305	-3.07893	6.41e-69	5.46e-67	DOWN
4531966	MSMEG_3953	hypothetical protein	NC_008596.1:4021891-4022955	-3.07636	1.79e-41	6.48e-40	DOWN
4532265	MSMEG_5572	sugar ABC transporter permease	NC_008596.1:5660234-5661112	-3.05838	5.53e-37	1.69e-35	DOWN
4536177	MSMEG_6405	Erp protein	NC_008596.1:6476344-6477261	-3.05394	1.65e-80	2.03e-78	DOWN
4532974	MSMEG_6582	pyridine nucleotide-disulfide oxidoreductase domain-containing protein	NC_008596.1:6636246-6637394	-3.0449	8.16e-65	6.38e-63	DOWN
4536999	MSMEG_5316	glutamine ABC transporter ATP-binding protein	NC_008596.1:5406434-5407207	-3.02895	9.53e-42	3.54e-40	DOWN
4537535	MSMEG_5406	hypothetical protein	NC_008596.1:5487002-5487118	-3.02263	1.24e-73	1.21e-71	DOWN
4536102	MSMEG_5506	hypothetical protein	NC_008596.1:5590070-5590582	-3.01874	4.38e-52	2.19e-50	DOWN
4535399	MSMEG_4073	pseudo	NC_008596.1:4145792-4146399	-3.01773	6.16e-51	2.99e-49	DOWN
4533731	murQ	N-acetylmuramic acid 6-phosphate etherase	NC_008596.1:217828-218724	-2.99425	1.75e-52	8.96e-51	DOWN
4535215	MSMEG_3145	secreted cell wall-associated hydrolase	NC_008596.1:3219661-3221154	-2.98824	9.73e-71	8.63e-69	DOWN
4535284	MSMEG_3315	hypothetical protein	NC_008596.1:3394195-3394488	-2.98695	8.81e-23	1.35e-21	DOWN
4535522	MSMEG_1778	hypothetical protein	NC_008596.1:1864985-1865326	-2.97261	5.48e-16	5.14e-15	DOWN
4533695	MSMEG_0172	transmembrane protein	NC_008596.1:197588-198190	-2.97074	1.58e-74	1.64e-72	DOWN
4533457	MSMEG_3384	isoflavone reductase	NC_008596.1:3454069-3454998	-2.96764	3.18e-61	2.35e-59	DOWN
4536509	MSMEG_5602	hypothetical protein	NC_008596.1:5688973-5689389	-2.95751	3.79e-13	2.86e-12	DOWN
4534852	hup	DNA-binding protein HU	NC_008596.1:2471469-2472095	-2.94984	4.34e-76	4.73e-74	DOWN
4536864	MSMEG_1683	cytosine/purines uracil thiamine allantoin permease	NC_008596.1:1775984-1777435	-2.94685	4.23e-74	4.26e-72	DOWN
4531423	MSMEG_2143	hypothetical protein	NC_008596.1:2215760-2216200	-2.93572	5.12e-48	2.32e-46	DOWN
4532648	MSMEG_3326	carboxylate-amine ligase	NC_008596.1:3404832-3406022	-2.93537	7.27e-61	5.25e-59	DOWN
4533367	MSMEG_3399	pseudo	NC_008596.1:3470412-3471556	-2.93192	1.31e-58	8.63e-57	DOWN
4537230	MSMEG_5580	Ku protein	NC_008596.1:5668970-5669956	-2.92767	1.92e-67	1.57e-65	DOWN
4536150	MSMEG_0819	N-carbamoyl-L-amino acid amidohydrolase	NC_008596.1:904883-906142	-2.91774	3.23e-35	9.14e-34	DOWN
4536835	MSMEG_5979	transferase	NC_008596.1:6042908-6043708	-2.91599	1.57e-13	1.23e-12	DOWN
4533718	MSMEG_0965	porin	NC_008596.1:1038908-1039543	-2.86852	3.06e-72	2.91e-70	DOWN
4533501	MSMEG_0207	MarR family transcriptional regulator	NC_008596.1:232728-233168	-2.86014	1.92e-14	1.61e-13	DOWN
4534673	MSMEG_3325	hypothetical protein	NC_008596.1:3404121-3404624	-2.85968	4.28e-58	2.76e-56	DOWN
4534969	MSMEG_3955	hypothetical protein	NC_008596.1:4025793-4026797	-2.84112	1.5e-65	1.19e-63	DOWN
4534948	MSMEG_0206	acyltransferase	NC_008596.1:233161-235296	-2.83874	1.33e-61	9.94e-60	DOWN
4530913	MSMEG_3954	trehalose 6-phosphate phosphorylase	NC_008596.1:4023070-4025790	-2.83606	1.2e-56	7.07e-55	DOWN
4535951	MSMEG_1771	methylase	NC_008596.1:1859306-1859974	-2.82342	2.14e-47	9.41e-46	DOWN
4533559	MSMEG_4396	isochorismatase hydrolase	NC_008596.1:4487275-4488018	-2.81678	6.97e-64	5.39e-62	DOWN
4534757	MSMEG_1550	PduH protein	NC_008596.1:1640922-1641263	-2.81392	4.18e-07	1.68e-06	DOWN
4535999	MSMEG_2906	hypothetical protein	NC_008596.1:2968218-2969042	-2.81287	4.5e-57	2.79e-55	DOWN
4531401	MSMEG_6601	hypothetical protein	NC_008596.1:6657133-6657654	-2.80907	4.95e-52	2.45e-50	DOWN
4532425	MSMEG_3331	hypothetical protein	NC_008596.1:3407950-3408447	-2.80474	1.13e-60	8.06e-59	DOWN
4535767	MSMEG_3935	hypothetical protein	NC_008596.1:4004936-4005712	-2.78248	1.27e-67	1.05e-65	DOWN
4536432	MSMEG_2503	hypothetical protein	NC_008596.1:2588395-2589414	-2.76932	2.24e-25	4.04e-24	DOWN
4532354	MSMEG_3410	TetR family transcriptional regulator	NC_008596.1:3483534-3484115	-2.76264	2.42e-44	9.87e-43	DOWN
4533591	MSMEG_0114	extracellular solute-binding protein	NC_008596.1:137817-138845	-2.74646	3.07e-36	9e-35	DOWN
4535995	MSMEG_3951	hypothetical protein	NC_008596.1:4020929-4021870	-2.72245	9.29e-59	6.17e-57	DOWN
4533525	MSMEG_0116	taurine import ATP-binding protein TauB	NC_008596.1:138829-139626	-2.70413	3.04e-32	7.57e-31	DOWN
4534857	MSMEG_1754	hypothetical protein	NC_008596.1:1844249-1844629	-2.69597	6.18e-43	2.42e-41	DOWN
4535059	MSMEG_3146	invasin 1	NC_008596.1:3221174-3221863	-2.67277	1.98e-55	1.13e-53	DOWN
4533787	MSMEG_6654	TnpC protein	NC_008596.1:6708371-6709774	-2.66715	2.97e-36	8.73e-35	DOWN
4534588	MSMEG_2504	3-isopropylmalate dehydratase small subunit	NC_008596.1:2589424-2589951	-2.66564	4.96e-12	3.34e-11	DOWN
4535237	MSMEG_2249	hypothetical protein	NC_008596.1:2329816-2330946	-2.66387	1.1e-53	5.87e-52	DOWN
4531557	MSMEG_5576	D-mannonate oxidoreductase	NC_008596.1:5664415-5665851	-2.65799	5.37e-54	2.98e-52	DOWN
4531754	MSMEG_2482	hypothetical protein	NC_008596.1:2565001-2565369	-2.65443	4.69e-10	2.69e-09	DOWN
4536236	MSMEG_1869	hypothetical protein	NC_008596.1:1943875-1944624	-2.65064	1.25e-27	2.56e-26	DOWN
4532954	MSMEG_1549	pseudo	NC_008596.1:1639029-1640899	-2.64938	9.97e-45	4.11e-43	DOWN
4536882	MSMEG_3324	hypothetical protein	NC_008596.1:3403857-3404060	-2.63961	6.86e-22	9.83e-21	DOWN
4537007	MSMEG_2919	2-dehydropantoate 2-reductase	NC_008596.1:2982192-2983193	-2.63909	7.24e-42	2.72e-40	DOWN
4535418	putP	sodium/proline symporter	NC_008596.1:5392572-5394098	-2.62409	7.13e-44	2.87e-42	DOWN
4537241	MSMEG_5109	hypothetical protein	NC_008596.1:5210371-5211210	-2.6232	2.69e-30	6.18e-29	DOWN
4532536	MSMEG_3949	hypothetical protein	NC_008596.1:4018666-4018917	-2.62043	1.44e-33	3.81e-32	DOWN
4536985	MSMEG_6506	nicotinamidase/pyrazinamidase	NC_008596.1:6567028-6567579	-2.61989	5.02e-33	1.29e-31	DOWN
4532565	MSMEG_2918	short-chain dehydrogenase/reductase SDR	NC_008596.1:2981309-2982106	-2.61178	1.63e-33	4.31e-32	DOWN
4531010	MSMEG_3356	hypothetical protein	NC_008596.1:3431015-3431353	-2.61	4.03e-24	6.72e-23	DOWN
4534135	MSMEG_5318	glutamine ABC transporter permease/substrate-binding protein	NC_008596.1:5407204-5408610	-2.60639	6.47e-41	2.31e-39	DOWN
4537696	MSMEG_2144	hypothetical protein	NC_008596.1:2216197-2216793	-2.60373	6.77e-54	3.69e-52	DOWN
4535107	MSMEG_3689	sodium:solute symporter	NC_008596.1:3753243-3754973	-2.60303	4.05e-61	2.96e-59	DOWN
4532114	MSMEG_5962	glycosyl transferase family protein	NC_008596.1:6023439-6024206	-2.60137	4.56e-17	4.64e-16	DOWN
4534315	MSMEG_3952	hypothetical protein	NC_008596.1:4020005-4020961	-2.58614	2.33e-60	1.65e-58	DOWN
4535363	MSMEG_1791	UsfY protein	NC_008596.1:1872145-1872453	-2.57991	2.98e-28	6.28e-27	DOWN
4531017	MSMEG_5505	hypothetical protein	NC_008596.1:5589415-5589999	-2.56747	1.9e-54	1.07e-52	DOWN
4535420	MSMEG_6509	multidrug ABC transporter ATP-binding protein	NC_008596.1:6570630-6571499	-2.55753	6.21e-28	1.29e-26	DOWN
4534159	MSMEG_6677	LysR family transcriptional regulator	NC_008596.1:6730109-6730969	-2.55145	2.9e-36	8.57e-35	DOWN
4534761	MSMEG_6559	hypothetical protein	NC_008596.1:6614451-6614735	-2.55115	1.9e-53	1e-51	DOWN
4532774	MSMEG_5967	glucose-methanol-choline oxidoreductase	NC_008596.1:6030680-6032335	-2.54914	3.83e-44	1.55e-42	DOWN
4536301	MSMEG_6283	FAD binding domain-containing protein	NC_008596.1:6346717-6348117	-2.54371	7.04e-54	3.81e-52	DOWN
4530900	MSMEG_5968	polysaccharide biosynthesis protein	NC_008596.1:6032735-6034267	-2.54229	8.08e-57	4.84e-55	DOWN
4531305	MSMEG_4071	pseudo	NC_008596.1:4145143-4145472	-2.53946	5.87e-28	1.22e-26	DOWN
4530881	MSMEG_0392	glycosyl transferase family protein	NC_008596.1:441687-443201	-2.53919	1.93e-50	9.18e-49	DOWN
4535697	MSMEG_2907	oxidoreductase YeiQ	NC_008596.1:2969066-2970517	-2.51611	3.48e-42	1.33e-40	DOWN
4533145	MSMEG_6848	oxidoreductase	NC_008596.1:6897798-6899045	-2.49041	1.55e-37	4.92e-36	DOWN
4531105	MSMEG_3688	hypothetical protein	NC_008596.1:3752918-3753229	-2.48358	5.25e-48	2.36e-46	DOWN
4537309	MSMEG_0390	acyltransferase	NC_008596.1:439605-440687	-2.47599	1.94e-43	7.71e-42	DOWN
4532727	mmsA	methylmalonate-semialdehyde dehydrogenase	NC_008596.1:2530003-2531496	-2.47102	9.16e-54	4.91e-52	DOWN
4532144	MSMEG_3020	hypothetical protein	NC_008596.1:3092925-3093758	-2.46774	9.93e-51	4.77e-49	DOWN
4535207	MSMEG_1565	TetR family transcriptional regulator	NC_008596.1:1654695-1655318	-2.46623	1.84e-44	7.55e-43	DOWN
4532223	MSMEG_2000	hypothetical protein	NC_008596.1:2081621-2082070	-2.45568	2.9e-13	2.22e-12	DOWN
4537736	MSMEG_5302	aerobic C4-dicarboxylate transporter	NC_008596.1:5390951-5392324	-2.45309	1.13e-52	5.82e-51	DOWN
4533317	xerC	site-specific tyrosine recombinase XerC	NC_008596.1:2601428-2602330	-2.44864	3.6e-49	1.67e-47	DOWN
4530871	MSMEG_3383	hypothetical protein	NC_008596.1:3453838-3453984	-2.44705	3e-22	4.42e-21	DOWN
4534174	MSMEG_1792	hypothetical protein	NC_008596.1:1872508-1872858	-2.44387	5.87e-17	5.92e-16	DOWN
4532141	cbiQ	cobalt ABC transporter permease	NC_008596.1:2688950-2689729	-2.4409	4.06e-45	1.7e-43	DOWN
4536576	MSMEG_1424	FMN-dependent dehydrogenase	NC_008596.1:1524546-1525745	-2.43901	2.04e-53	1.07e-51	DOWN
4536287	MSMEG_3395	short chain dehydrogenase	NC_008596.1:3466032-3466808	-2.41841	3.21e-36	9.37e-35	DOWN
4532514	MSMEG_5603	ArsR family transcriptional regulator	NC_008596.1:5689444-5689782	-2.41312	1.44e-05	4.65e-05	DOWN
4533473	MSMEG_5468	hypothetical protein	NC_008596.1:5550191-5551345	-2.40505	2.53e-52	1.28e-50	DOWN
4534098	pruA	1-pyrroline-5-carboxylate dehydrogenase	NC_008596.1:5216637-5218265	-2.38622	2.59e-45	1.1e-43	DOWN
4532810	MSMEG_3408	hypothetical protein	NC_008596.1:3481863-3482456	-2.36378	1.01e-38	3.36e-37	DOWN
4535436	MSMEG_4519	NrtC protein	NC_008596.1:4606739-4607761	-2.36158	1.23e-11	8.05e-11	DOWN
4531554	MSMEG_5964	group 1 glycosyl transferase	NC_008596.1:6026548-6027831	-2.36017	4.25e-33	1.1e-31	DOWN
4537094	MSMEG_0120	transcriptional regulatory protein	NC_008596.1:141969-142628	-2.35646	1.07e-41	3.94e-40	DOWN
4533071	MSMEG_0818	transporter major facilitator family protein	NC_008596.1:903499-904851	-2.35108	7.86e-29	1.7e-27	DOWN
4531713	MSMEG_5928	hypothetical protein	NC_008596.1:5988156-5988833	-2.34776	3.85e-30	8.82e-29	DOWN
4532681	MSMEG_1755	anti-sigm factor, ChrR	NC_008596.1:1844642-1845010	-2.34289	1.08e-39	3.66e-38	DOWN
4532380	MSMEG_4605	pseudo	NC_008596.1:4692393-4692797	-2.33451	4.08e-38	1.32e-36	DOWN
4534613	MSMEG_1421	hypothetical protein	NC_008596.1:1522905-1523063	-2.32992	2.53e-34	6.97e-33	DOWN
4536602	MSMEG_3915	NAD-dependent alcohol dehydrogenase	NC_008596.1:3983780-3984850	-2.31851	1.27e-31	3.06e-30	DOWN
4536392	MSMEG_3950	universal stress protein family protein	NC_008596.1:4019051-4019935	-2.31656	8.99e-50	4.21e-48	DOWN
4531618	glgC	glucose-1-phosphate adenylyltransferase	NC_008596.1:5178352-5179566	-2.31174	2.72e-43	1.08e-41	DOWN
4537739	MSMEG_3615	zinc-binding alcohol dehydrogenase	NC_008596.1:3678705-3679718	-2.3023	3.99e-37	1.23e-35	DOWN
4535336	MSMEG_2107	hypothetical protein	NC_008596.1:2183185-2184645	-2.30153	5.27e-40	1.81e-38	DOWN
4534829	MSMEG_0121	rhamnolipid biosynthesis 3-oxoacyl-ACP reductase	NC_008596.1:142625-143398	-2.29952	6.13e-36	1.77e-34	DOWN
4535072	ectA	L-2,4-diaminobutyric acid acetyltransferase	NC_008596.1:3972734-3973267	-2.29885	1.76e-34	4.89e-33	DOWN
4537730	MSMEG_0524	short chain dehydrogenase	NC_008596.1:603036-603863	-2.29452	2.97e-11	1.88e-10	DOWN
4535571	MSMEG_4395	excalibur domain-containing protein	NC_008596.1:4487077-4487268	-2.2945	2.82e-25	5.02e-24	DOWN
4537190	MSMEG_1423	radical SAM domain-containing protein	NC_008596.1:1523371-1524549	-2.28583	1.18e-46	5.14e-45	DOWN
4534594	MSMEG_3695	hypothetical protein	NC_008596.1:3761143-3761553	-2.28513	6.78e-14	5.44e-13	DOWN
4531377	MSMEG_1772	hypothetical protein	NC_008596.1:1859971-1860186	-2.28336	1.75e-12	1.24e-11	DOWN
4536007	MSMEG_2416	hypothetical protein	NC_008596.1:2498281-2499018	-2.28191	9.04e-48	4e-46	DOWN
4532672	MSMEG_6636	[Mn] superoxide dismutase	NC_008596.1:6686470-6687090	-2.27812	1.43e-42	5.53e-41	DOWN
4532089	MSMEG_4604	hypothetical protein	NC_008596.1:4692127-4692264	-2.27793	6.17e-15	5.36e-14	DOWN
4537145	MSMEG_6307	glutamine-binding periplasmic protein/glutamine transporter permease	NC_008596.1:6373123-6374550	-2.27602	1.27e-40	4.41e-39	DOWN
4535937	MSMEG_0199	pseudo	NC_008596.1:223997-224775	-2.27246	1.32e-21	1.86e-20	DOWN
4532093	MSMEG_0395	hypothetical protein	NC_008596.1:444662-444796	-2.26606	7.19e-24	1.18e-22	DOWN
4530957	MSMEG_3913	pseudo	NC_008596.1:3983339-3983764	-2.26402	1.29e-21	1.82e-20	DOWN
4532019	MSMEG_2463	nicotine dehydrogenase chain A	NC_008596.1:2543310-2544191	-2.24759	8.17e-12	5.41e-11	DOWN
4532638	MSMEG_5969	hypothetical protein	NC_008596.1:6034371-6035585	-2.2472	2.67e-45	1.12e-43	DOWN
4532441	MSMEG_1256	hypothetical protein	NC_008596.1:1345348-1345767	-2.2429	4.54e-22	6.61e-21	DOWN
4535707	MSMEG_5299	hypothetical protein	NC_008596.1:5388829-5389104	-2.24003	2.85e-12	1.98e-11	DOWN
4534939	MSMEG_5107	hypothetical protein	NC_008596.1:5209709-5210374	-2.23354	1.65e-12	1.17e-11	DOWN
4531118	MSMEG_2584	penicillin-binding protein	NC_008596.1:2665920-2667740	-2.23259	9.75e-46	4.15e-44	DOWN
4533108	MSMEG_2608	cobalt transporter CbiM	NC_008596.1:2688610-2688948	-2.23213	1.89e-36	5.65e-35	DOWN
4536235	MSMEG_3558	carboxymethylenebutenolidase	NC_008596.1:3619557-3620492	-2.22996	2.13e-20	2.75e-19	DOWN
4531769	MSMEG_0396	hypothetical protein	NC_008596.1:445187-445585	-2.22895	2.78e-05	8.6e-05	DOWN
4537639	MSMEG_0774	pseudo	NC_008596.1:858306-859402	-2.22528	1.84e-38	6.01e-37	DOWN
4533528	MSMEG_1741	TetR family transcriptional regulator	NC_008596.1:1833986-1834660	-2.2239	1.15e-43	4.59e-42	DOWN
4536012	MSMEG_5976	epimerase/dehydratase	NC_008596.1:6041185-6042213	-2.22149	4.25e-22	6.21e-21	DOWN
4536016	rocD	ornithine--oxo-acid transaminase	NC_008596.1:1515608-1516876	-2.2213	2.81e-24	4.72e-23	DOWN
4532460	MSMEG_4133	transposase	NC_008596.1:4212793-4213806	-2.22049	1.18e-09	6.5e-09	DOWN
4534101	MSMEG_6241	ATPase AAA	NC_008596.1:6306443-6307501	-2.22006	7.8e-37	2.38e-35	DOWN
4534382	MSMEG_1422	hypothetical protein	NC_008596.1:1523066-1523374	-2.21895	8.65e-37	2.63e-35	DOWN
4532636	MSMEG_6309	ABC transporter ATP-binding protein	NC_008596.1:6374547-6375320	-2.2169	1.44e-33	3.81e-32	DOWN
4531549	MSMEG_3979	pseudo	NC_008596.1:4048092-4048870	-2.2156	8.18e-26	1.51e-24	DOWN
4533076	MSMEG_3375	alcohol dehydrogenase	NC_008596.1:3445911-3447587	-2.21281	4.18e-38	1.35e-36	DOWN
4533745	MSMEG_4650	oxidoreductase YisS	NC_008596.1:4737384-4738391	-2.21198	5.96e-09	3.01e-08	DOWN
4533761	MSMEG_0519	hypothetical protein	NC_008596.1:599806-599922	-2.20521	1.25e-05	4.09e-05	DOWN
4532882	MSMEG_2501	nitrate/sulfonate/bicarbonate ABC transporter inner membrane protein	NC_008596.1:2586687-2587553	-2.20139	5.14e-13	3.83e-12	DOWN
4536542	MSMEG_4518	hypothetical protein	NC_008596.1:4606212-4606742	-2.20038	4.56e-09	2.34e-08	DOWN
4532078	MSMEG_0982	immunogenic protein	NC_008596.1:1053805-1054854	-2.19773	2.8e-14	2.32e-13	DOWN
4535890	MSMEG_0446	putrescine importer	NC_008596.1:520569-521912	-2.19071	8.36e-30	1.89e-28	DOWN
4535178	MSMEG_3333	pseudo	NC_008596.1:3409552-3410638	-2.18813	2.31e-26	4.44e-25	DOWN
4534951	MSMEG_4689	hypothetical protein	NC_008596.1:4774279-4774683	-2.1827	3.23e-34	8.8e-33	DOWN
4532226	MSMEG_6679	metallo-beta-lactamase	NC_008596.1:6731106-6732014	-2.17901	1.27e-06	4.79e-06	DOWN
4535228	MSMEG_3525	XRE family transcriptional regulator	NC_008596.1:3587930-3588706	-2.17644	4.38e-22	6.39e-21	DOWN
4535232	MSMEG_1867	transposase	NC_008596.1:1943053-1943334	-2.17419	1.02e-14	8.78e-14	DOWN
4532620	MSMEG_3453	hypothetical protein	NC_008596.1:3521023-3521151	-2.16516	0.000221492	0.000592936	DOWN
4532958	MSMEG_6557	dehydrogenase	NC_008596.1:6613539-6614441	-2.16374	9.64e-42	3.56e-40	DOWN
4530868	MSMEG_4985	carbonic anhydrase	NC_008596.1:5080106-5080597	-2.15996	5.75e-28	1.2e-26	DOWN
4534771	MSMEG_2225	TetR family transcriptional regulator	NC_008596.1:2304294-2305031	-2.15834	1.72e-37	5.41e-36	DOWN
4534293	MSMEG_5573	sugar ABC transporter permease	NC_008596.1:5661109-5662071	-2.15358	3.37e-27	6.68e-26	DOWN
4536637	MSMEG_5051	major facilitator superfamily protein	NC_008596.1:5151761-5153071	-2.1515	1.07e-40	3.8e-39	DOWN
4536611	MSMEG_5253	hypothetical protein	NC_008596.1:5346674-5347081	-2.14974	3.4e-15	3.01e-14	DOWN
4532267	MSMEG_1544	PduO protein	NC_008596.1:1635013-1635411	-2.14906	3.38e-20	4.32e-19	DOWN
4537688	MSMEG_0594	iron-sulfur cluster binding protein	NC_008596.1:671348-672817	-2.1475	1.4e-41	5.11e-40	DOWN
4535860	MSMEG_3936	universal stress protein family protein	NC_008596.1:4005847-4006746	-2.13828	2.17e-29	4.83e-28	DOWN
4532518	MSMEG_0593	hypothetical protein	NC_008596.1:670737-671384	-2.13199	1.22e-34	3.39e-33	DOWN
4535039	MSMEG_0195	steroid monooxygenase	NC_008596.1:219598-221238	-2.13111	6.99e-23	1.08e-21	DOWN
4537278	cbiM	cobalamin biosynthesis protein CbiM	NC_008596.1:2687927-2688613	-2.12926	1.11e-39	3.74e-38	DOWN
4536035	MSMEG_0595	glycolate oxidase	NC_008596.1:672814-673551	-2.12749	1.6e-37	5.03e-36	DOWN
4532962	cysE	serine O-acetyltransferase	NC_008596.1:6007711-6008229	-2.12458	5.15e-15	4.5e-14	DOWN
4535990	MSMEG_4984	hypothetical protein	NC_008596.1:5079613-5080017	-2.12281	1.13e-20	1.5e-19	DOWN
4535960	MSMEG_0731	hypothetical protein	NC_008596.1:816851-817474	-2.12231	4.56e-25	8.05e-24	DOWN
4535027	MSMEG_3357	metal-dependent phosphohydrolase	NC_008596.1:3431438-3432004	-2.12173	4.03e-32	9.89e-31	DOWN
4533165	cydB	cytochrome D ubiquinol oxidase subunit II	NC_008596.1:3315095-3316147	-2.12125	1.67e-41	6.06e-40	DOWN
4537297	MSMEG_3748	thiamin pyrophosphokinase catalytic subunit	NC_008596.1:3812765-3813961	-2.11892	6.96e-42	2.63e-40	DOWN
4535726	gmhA	phosphoheptose isomerase	NC_008596.1:2778898-2779581	-2.11558	5.93e-06	2.05e-05	DOWN
4535862	MSMEG_6282	KanY protein	NC_008596.1:6346190-6346627	-2.11079	1.23e-39	4.15e-38	DOWN
4535147	MSMEG_0631	pseudo	NC_008596.1:712068-713446	-2.10721	4.08e-28	8.59e-27	DOWN
4534596	MSMEG_3552	hypothetical protein	NC_008596.1:3611488-3612708	-2.10711	3.94e-25	6.96e-24	DOWN
4534577	ectB	diaminobutyrate--2-oxoglutarate aminotransferase	NC_008596.1:3971368-3972654	-2.10222	7.81e-33	1.98e-31	DOWN
4533503	MSMEG_3394	cupin	NC_008596.1:3465586-3466005	-2.10184	2.31e-23	3.69e-22	DOWN
4537579	MSMEG_6851	phosphatidylethanolamine-binding protein	NC_008596.1:6901769-6902308	-2.10173	0.000146012	0.000403888	DOWN
4536191	MSMEG_6511	acyl-CoA dehydrogenase	NC_008596.1:6572351-6573508	-2.10054	1.16e-40	4.07e-39	DOWN
4534538	MSMEG_1392	alcohol dehydrogenase	NC_008596.1:1494011-1495168	-2.09683	3.05e-34	8.35e-33	DOWN
4534112	MSMEG_0517	sugar binding-protein dependent transporter system permease	NC_008596.1:597644-598570	-2.09591	1.95e-06	7.2e-06	DOWN
4533565	MSMEG_2259	carbon starvation protein A	NC_008596.1:2340686-2342992	-2.095	2.84e-35	8.1e-34	DOWN
4532566	MSMEG_3323	hypothetical protein	NC_008596.1:3403263-3403796	-2.09475	4.21e-22	6.17e-21	DOWN
4531115	MSMEG_1856	hypothetical protein	NC_008596.1:1933836-1934534	-2.09307	5.52e-18	6.15e-17	DOWN
4530985	groEL	molecular chaperone GroEL	NC_008596.1:2059864-2061513	-2.0918	1.66e-27	3.36e-26	DOWN
4533854	MSMEG_0379	nitrile hydratase activator P14k	NC_008596.1:424350-424631	-2.0881	0.0238218	0.0425655	DOWN
4536232	MSMEG_0632	hypothetical protein	NC_008596.1:713531-714025	-2.07782	1.55e-22	2.33e-21	DOWN
4533044	MSMEG_0821	glutamyl-tRNA(Gln) amidotransferase subunit A	NC_008596.1:906142-907605	-2.07743	2.87e-17	2.98e-16	DOWN
4534941	MSMEG_2460	transporter permease	NC_008596.1:2539350-2540198	-2.06834	2.32e-15	2.09e-14	DOWN
4532323	MSMEG_6018	xylose transporter permease XylH	NC_008596.1:6082847-6084166	-2.06688	2.3e-12	1.62e-11	DOWN
4530810	MSMEG_2104	GntR family transcriptional regulator	NC_008596.1:2180401-2181750	-2.05791	1.32e-25	2.42e-24	DOWN
4531147	MSMEG_3972	LysR family transcriptional regulator	NC_008596.1:4038226-4039044	-2.05663	1.39e-18	1.61e-17	DOWN
4530816	MSMEG_4778	thiolase	NC_008596.1:4879668-4880813	-2.05652	4.42e-23	6.93e-22	DOWN
4537413	MSMEG_0196	dehydrogenase	NC_008596.1:221243-222139	-2.05598	2.23e-13	1.73e-12	DOWN
4535972	MSMEG_5117	proline dehydrogenase	NC_008596.1:5215682-5216635	-2.05483	6.75e-31	1.6e-29	DOWN
4530914	MSMEG_2905	transcriptional regulator	NC_008596.1:2967713-2968099	-2.04931	1.28e-32	3.23e-31	DOWN
4534608	MSMEG_5978	GlcNAc-PI de-N-acetylase	NC_008596.1:6042243-6042911	-2.03964	3.19e-08	1.48e-07	DOWN
4532156	MSMEG_2458	hypothetical protein	NC_008596.1:2537542-2538522	-2.02925	4.77e-23	7.45e-22	DOWN
4536091	MSMEG_3233	cytochrome D ubiquinol oxidase subunit 1	NC_008596.1:3316161-3317624	-2.02904	1.42e-38	4.66e-37	DOWN
4532809	MSMEG_3925	AttM/AiiB family protein	NC_008596.1:3992167-3993123	-2.02516	9.88e-21	1.32e-19	DOWN
4537612	MSMEG_0892	hypothetical protein	NC_008596.1:977160-978005	-2.02319	1.5e-25	2.75e-24	DOWN
4535440	MSMEG_6281	N-acetylmuramoyl-L-alanine amidase	NC_008596.1:6345388-6346182	-2.01492	1.23e-36	3.72e-35	DOWN
4532761	MSMEG_2459	transporter ATPase	NC_008596.1:2538553-2539353	-2.01488	1.2e-18	1.4e-17	DOWN
4535963	MSMEG_3390	enoyl-CoA hydratase	NC_008596.1:3461441-3462214	-2.01488	9.02e-13	6.56e-12	DOWN
4537484	MSMEG_5601	hypothetical protein	NC_008596.1:5688013-5688570	-2.0136	1.22e-14	1.05e-13	DOWN
4531217	MSMEG_0352	hypothetical protein	NC_008596.1:391385-391987	-2.0107	6.04e-15	5.26e-14	DOWN
4536724	MSMEG_0651	hypothetical protein	NC_008596.1:732984-733664	-2.00965	6.59e-20	8.29e-19	DOWN
4532466	MSMEG_1777	UsfY protein	NC_008596.1:1864669-1864974	-2.0087	7.69e-17	7.67e-16	DOWN
4537742	MSMEG_2450	hypothetical protein	NC_008596.1:2531510-2532895	-2.00816	2.82e-37	8.79e-36	DOWN
4536749	MSMEG_1661	D-alanyl-D-alanine carboxypeptidase	NC_008596.1:1756022-1757215	-2.00437	2.15e-36	6.39e-35	DOWN
4536288	cheR	chemotaxis protein CheR	NC_008596.1:5641267-5643117	-2.00191	1.71e-35	4.89e-34	DOWN
4532046	MSMEG_4391	acyl-CoA dehydrogenase	NC_008596.1:4482417-4483634	-2.00078	1.08e-11	7.1e-11	DOWN
4532383	MSMEG_3367	short-chain dehydrogenase/reductase SDR	NC_008596.1:3439442-3440194	-2.00005	6.61e-12	4.4e-11	DOWN
4534919	MSMEG_0887	hypothetical protein	NC_008596.1:972865-973422	-1.99509	7.82e-31	1.84e-29	DOWN
4532673	MSMEG_5257	hemolysin III family channel protein	NC_008596.1:5349936-5350706	-1.99241	3.35e-35	9.44e-34	DOWN
4531869	menB	naphthoate synthase	NC_008596.1:1140401-1141330	-1.98839	1.61e-30	3.71e-29	DOWN
4533113	MSMEG_2099	nitrate/sulfonate ABC transporter substrate-binding protein	NC_008596.1:2175058-2176023	-1.98496	6.64e-10	3.74e-09	DOWN
4535869	MSMEG_5552	hypothetical protein	NC_008596.1:5643114-5643251	-1.97921	3.56e-14	2.94e-13	DOWN
4536097	MSMEG_2505	3-isopropylmalate dehydratase large subunit	NC_008596.1:2589951-2591192	-1.97887	1.39e-14	1.18e-13	DOWN
4535067	MSMEG_4614	GAF family protein	NC_008596.1:4698213-4698959	-1.97778	2.34e-16	2.27e-15	DOWN
4534145	MSMEG_3994	short chain dehydrogenase	NC_008596.1:4066219-4067007	-1.97254	7.97e-10	4.47e-09	DOWN
4535745	MSMEG_2457	hypothetical protein	NC_008596.1:2537190-2537507	-1.97246	0.000532203	0.00132642	DOWN
4537712	MSMEG_2713	peptidase M52, hydrogen uptake protein	NC_008596.1:2783783-2784265	-1.97246	0.000532203	0.00132642	DOWN
4534836	MSMEG_0820	hypothetical protein	NC_008596.1:907599-907868	-1.97246	0.0139282	0.0262639	DOWN
4534560	MSMEG_5352	hypothetical protein	NC_008596.1:5435666-5435977	-1.97078	2.52e-25	4.52e-24	DOWN
4533257	MSMEG_2078	antigen 85-C	NC_008596.1:2155501-2156478	-1.96565	3.56e-36	1.03e-34	DOWN
4533310	MSMEG_3364	RhtB family protein transporter	NC_008596.1:3436955-3437581	-1.96232	2.16e-25	3.91e-24	DOWN
4535183	glgX	glycogen debranching protein GlgX	NC_008596.1:6567776-6569893	-1.95613	1.17e-35	3.37e-34	DOWN
4534922	MSMEG_0386	NAD dependent epimerase/dehydratase	NC_008596.1:434928-436061	-1.95189	2.19e-32	5.51e-31	DOWN
4534060	MSMEG_1745	transcriptional regulator	NC_008596.1:1838043-1838657	-1.95132	1.59e-23	2.58e-22	DOWN
4532967	MSMEG_0394	hypothetical protein	NC_008596.1:444075-444329	-1.947	5.01e-34	1.36e-32	DOWN
4532000	MSMEG_5959	hypothetical protein	NC_008596.1:6021392-6022453	-1.94581	1.25e-15	1.14e-14	DOWN
4535538	MSMEG_2461	transporter permease	NC_008596.1:2540195-2540983	-1.94401	2.41e-13	1.86e-12	DOWN
4532717	MSMEG_3497	ArsR family transcriptional regulator	NC_008596.1:3562524-3563264	-1.94312	8.49e-19	9.93e-18	DOWN
4536634	MSMEG_1727	pseudo	NC_008596.1:1820885-1821124	-1.9422	8.92e-13	6.49e-12	DOWN
4533558	MSMEG_2517	alpha/beta hydrolase	NC_008596.1:2602327-2603208	-1.94118	8.01e-32	1.94e-30	DOWN
4537664	MSMEG_4651	AP endonuclease, family protein 2	NC_008596.1:4738388-4739257	-1.93343	4.3e-09	2.22e-08	DOWN
4535226	MSMEG_2661	hypothetical protein	NC_008596.1:2742304-2743065	-1.93255	1.09e-28	2.35e-27	DOWN
4536972	MSMEG_5575	repressor	NC_008596.1:5663425-5664351	-1.93242	7.97e-17	7.92e-16	DOWN
4532740	MSMEG_0383	hypothetical protein	NC_008596.1:431707-432045	-1.93202	5.3e-32	1.29e-30	DOWN
4535415	MSMEG_6802	ABC transporter ATP-binding protein	NC_008596.1:6849104-6849895	-1.93051	2.2e-17	2.31e-16	DOWN
4533762	MSMEG_5877	hypothetical protein	NC_008596.1:5938617-5939687	-1.92548	6.5e-31	1.54e-29	DOWN
4530861	MSMEG_1414	amidinotransferase	NC_008596.1:1516873-1517760	-1.92487	3.27e-20	4.21e-19	DOWN
4532285	MSMEG_5926	hypothetical protein	NC_008596.1:5986627-5988120	-1.9246	2.39e-25	4.29e-24	DOWN
4537176	MSMEG_5304	two-component sensor kinase	NC_008596.1:5394189-5395772	-1.92375	5.27e-26	9.87e-25	DOWN
4532825	MSMEG_5305	choline dehydrogenase	NC_008596.1:5396446-5397849	-1.92184	3.84e-20	4.88e-19	DOWN
4537293	MSMEG_3311	acyl carrier protein	NC_008596.1:3390856-3391146	-1.92007	2.78e-05	8.61e-05	DOWN
4531320	MSMEG_2452	hypothetical protein	NC_008596.1:2533824-2534033	-1.91959	1.34e-18	1.55e-17	DOWN
4533423	MSMEG_3272	ribose 5-phosphate isomerase	NC_008596.1:3354375-3354836	-1.9151	2.09e-09	1.12e-08	DOWN
4535555	MSMEG_3163	gp55 protein	NC_008596.1:3238864-3239595	-1.91446	2.27e-23	3.63e-22	DOWN
4533843	MSMEG_2462	carbon-monoxide dehydrogenase	NC_008596.1:2540980-2543313	-1.9134	3.82e-19	4.61e-18	DOWN
4531286	MSMEG_6512	acyl-CoA dehydrogenase	NC_008596.1:6573517-6574626	-1.90909	8.3e-34	2.23e-32	DOWN
4532270	MSMEG_1078	hydrolase	NC_008596.1:1142177-1142866	-1.90886	7.31e-30	1.66e-28	DOWN
4533537	MSMEG_5834	metallo-beta-lactamase superfamily protein	NC_008596.1:5900103-5900858	-1.90003	2.04e-26	3.92e-25	DOWN
4534469	MSMEG_0966	hypothetical protein	NC_008596.1:1039684-1040067	-1.89673	2.94e-16	2.81e-15	DOWN
4536071	MSMEG_2257	cytochrome P450-terp	NC_008596.1:2339303-2340538	-1.89429	4.03e-15	3.54e-14	DOWN
4530921	MSMEG_0605	hypothetical protein	NC_008596.1:682652-683758	-1.89418	4.6e-18	5.15e-17	DOWN
4534111	MSMEG_3747	pseudo	NC_008596.1:3811821-3812761	-1.89167	3.37e-33	8.79e-32	DOWN
4534493	MSMEG_6575	beta-lactamase	NC_008596.1:6629407-6630636	-1.88955	4.81e-30	1.1e-28	DOWN
4535864	MSMEG_2181	cell filamentation protein	NC_008596.1:2258987-2259802	-1.8887	5.04e-09	2.56e-08	DOWN
4534663	MSMEG_3413	pseudo	NC_008596.1:3485603-3485981	-1.888	7.66e-18	8.43e-17	DOWN
4534392	MSMEG_0296	MarR family transcriptional regulator	NC_008596.1:327192-327647	-1.88684	1.54e-20	2.03e-19	DOWN
4537423	mdcG	phosphoribosyl-dephospho-CoA transferase	NC_008596.1:6682015-6682620	-1.88682	6.06e-05	0.000178625	DOWN
4530873	MSMEG_0391	Rmt3 protein	NC_008596.1:440861-441649	-1.8867	1.42e-33	3.8e-32	DOWN
4535239	hisG	ATP phosphoribosyltransferase	NC_008596.1:4257530-4258396	-1.88597	2.88e-32	7.19e-31	DOWN
4533256	MSMEG_3398	integral membrane transporter	NC_008596.1:3469021-3470343	-1.88461	4.79e-17	4.87e-16	DOWN
4534587	MSMEG_3385	hypothetical protein	NC_008596.1:3454995-3455480	-1.88292	4.39e-16	4.14e-15	DOWN
4535240	MSMEG_3355	hypothetical protein	NC_008596.1:3430051-3430938	-1.88198	5.82e-21	7.9e-20	DOWN
4533279	dehII	haloacid dehalogenase	NC_008596.1:139607-140287	-1.87946	5.63e-12	3.77e-11	DOWN
4531823	MSMEG_5254	hypothetical protein	NC_008596.1:5347134-5347541	-1.87943	1.38e-07	5.96e-07	DOWN
4533579	MSMEG_3477	inv protein	NC_008596.1:3543755-3544417	-1.87606	5.76e-33	1.47e-31	DOWN
4535801	MSMEG_5509	hypothetical protein	NC_008596.1:5594766-5595632	-1.8724	9.03e-16	8.3e-15	DOWN
4533035	MSMEG_2690	DNA translocase FtsK	NC_008596.1:2765524-2768304	-1.87151	2.29e-33	6e-32	DOWN
4532090	MSMEG_2266	hypothetical protein	NC_008596.1:2348549-2348812	-1.87069	1.24e-12	8.87e-12	DOWN
4532232	MSMEG_3366	isonitrile hydratase	NC_008596.1:3438709-3439404	-1.86279	5.7e-13	4.24e-12	DOWN
4533969	MSMEG_4081	transposase IS116/IS110/IS902	NC_008596.1:4155111-4156322	-1.8601	0.00069267	0.00169023	DOWN
4536050	MSMEG_2983	hypothetical protein	NC_008596.1:3048445-3048876	-1.85966	2.36e-31	5.62e-30	DOWN
4535944	MSMEG_1101	hypothetical protein	NC_008596.1:1164280-1165446	-1.85743	1.67e-21	2.34e-20	DOWN
4533540	MSMEG_4603	pseudo	NC_008596.1:4691204-4692027	-1.8571	7.41e-08	3.29e-07	DOWN
4531547	MSMEG_0269	short chain dehydrogenase	NC_008596.1:303324-304103	-1.85605	2.32e-21	3.21e-20	DOWN
4537302	MSMEG_3980	GntR family transcriptional regulator	NC_008596.1:4049025-4049669	-1.85337	3.97e-23	6.26e-22	DOWN
4536555	cydD	cysteine ABC transporter permease/ATP-binding protein	NC_008596.1:3313470-3314999	-1.85284	5.02e-32	1.23e-30	DOWN
4534264	mtnN	MTA/SAH nucleosidase	NC_008596.1:1843365-1844117	-1.85067	2.92e-25	5.19e-24	DOWN
4532748	MSMEG_3976	DNA-binding protein	NC_008596.1:4045146-4045796	-1.84988	2.09e-19	2.55e-18	DOWN
4533534	MSMEG_6510	multidrug ABC transporter	NC_008596.1:6571489-6572292	-1.84703	1.4e-12	9.99e-12	DOWN
4532355	MSMEG_4029	hypothetical protein	NC_008596.1:4101244-4101849	-1.84658	1.18e-24	2.02e-23	DOWN
4537085	MSMEG_6545	phosphoglycerate mutase	NC_008596.1:6602127-6602834	-1.84462	1.72e-17	1.82e-16	DOWN
4531738	MSMEG_3297	CadC family transcriptional regulator	NC_008596.1:3376204-3377424	-1.83672	8.92e-28	1.84e-26	DOWN
4534921	MSMEG_0872	twin-arginine translocation pathway signal	NC_008596.1:959461-960078	-1.83505	7.19e-09	3.59e-08	DOWN
4533038	MSMEG_1886	Fatty acid desaturase	NC_008596.1:1965203-1966459	-1.83372	3.07e-32	7.61e-31	DOWN
4536559	MSMEG_5349	hypothetical protein	NC_008596.1:5433042-5433650	-1.83359	1.43e-19	1.77e-18	DOWN
4532895	MSMEG_1077	hypothetical protein	NC_008596.1:1141706-1142155	-1.83316	8.94e-27	1.75e-25	DOWN
4534314	MSMEG_0209	ribonuclease inhibitor	NC_008596.1:235782-236060	-1.83056	2.62e-05	8.16e-05	DOWN
4531375	rfbA	glucose-1-phosphate thymidylyltransferase	NC_008596.1:432229-433095	-1.83037	5.12e-24	8.47e-23	DOWN
4531369	MSMEG_2451	HAD-superfamily hydrolase	NC_008596.1:2533009-2533785	-1.82894	2.62e-28	5.56e-27	DOWN
4536036	MSMEG_5188	caax amino protease	NC_008596.1:5287602-5288285	-1.82719	1.18e-24	2.02e-23	DOWN
4537039	MSMEG_0472	lipoprotein	NC_008596.1:548983-549768	-1.8257	2.31e-08	1.09e-07	DOWN
4536938	MSMEG_5353	methyltransferase	NC_008596.1:5435982-5436746	-1.82222	4.02e-16	3.81e-15	DOWN
4536070	MSMEG_2481	hypothetical protein	NC_008596.1:2563709-2564953	-1.82183	6.18e-13	4.57e-12	DOWN
4531536	MSMEG_0537	hypothetical protein	NC_008596.1:617136-617564	-1.81937	2.33e-31	5.57e-30	DOWN
4534433	MSMEG_3526	hypothetical protein	NC_008596.1:3588785-3589417	-1.81645	1.11e-09	6.13e-09	DOWN
4531191	MSMEG_6803	ribose transporter permease RbsC	NC_008596.1:6849892-6850911	-1.81597	1.91e-20	2.47e-19	DOWN
4531908	MSMEG_0703	hypothetical protein	NC_008596.1:791573-792196	-1.81263	1.26e-27	2.57e-26	DOWN
4536886	MSMEG_1126	hypothetical protein	NC_008596.1:1188580-1188864	-1.81213	5.88e-06	2.03e-05	DOWN
4537667	MSMEG_0609	hypothetical protein	NC_008596.1:685955-686830	-1.80697	1.09e-14	9.37e-14	DOWN
4534503	MSMEG_5658	epoxide hydrolase	NC_008596.1:5748411-5749523	-1.80324	7.12e-25	1.24e-23	DOWN
4534603	MSMEG_0518	sn-glycerol-3-phosphate ABC transporter ATPase	NC_008596.1:598612-599718	-1.80264	1.24e-12	8.86e-12	DOWN
4536672	MSMEG_1184	serine esterase, cutinase	NC_008596.1:1246704-1247582	-1.80023	9.81e-23	1.5e-21	DOWN
4535708	pyk	pyruvate kinase	NC_008596.1:176579-178012	-1.79911	1.49e-22	2.24e-21	DOWN
4531476	MSMEG_4711	pyruvate dehydrogenase E1 component subunit beta	NC_008596.1:4801382-4802458	-1.79855	1.44e-11	9.33e-11	DOWN
4533531	MSMEG_2226	hypothetical protein	NC_008596.1:2305009-2305179	-1.79849	0.000645788	0.00158455	DOWN
4534780	MSMEG_0434	aminoglycoside 2'-N-acetyltransferase	NC_008596.1:510209-510841	-1.79744	3.15e-29	6.91e-28	DOWN
4536833	MSMEG_5230	hypothetical protein	NC_008596.1:5323505-5323840	-1.79406	5.9e-17	5.94e-16	DOWN
4536493	MSMEG_6242	alcohol dehydrogenase	NC_008596.1:6307532-6308803	-1.79294	8.46e-27	1.66e-25	DOWN
4532700	uppS	UDP diphosphate synthase	NC_008596.1:5349086-5349877	-1.79162	1.31e-24	2.24e-23	DOWN
4536297	MSMEG_4027	zinc-containing alcohol dehydrogenase superfamily protein	NC_008596.1:4099750-4100754	-1.79073	8.39e-17	8.29e-16	DOWN
4533924	MSMEG_6008	acetyl-CoA acetyltransferase	NC_008596.1:6072343-6073491	-1.78768	1.06e-26	2.07e-25	DOWN
4531865	MSMEG_1799	transcriptional regulator	NC_008596.1:1879301-1880209	-1.78278	2.64e-18	3e-17	DOWN
4537343	MSMEG_3298	response regulator receiver domain-containing protein	NC_008596.1:3377556-3378146	-1.77991	3.76e-13	2.84e-12	DOWN
4534136	MSMEG_0406	acyl-CoA dehydrogenase	NC_008596.1:468441-470276	-1.77874	1.5e-30	3.48e-29	DOWN
4536845	MSMEG_1776	ribonuclease Z	NC_008596.1:1863597-1864526	-1.7771	2.65e-18	3e-17	DOWN
4533795	MSMEG_5549	hypothetical protein	NC_008596.1:5638116-5639345	-1.77533	2.64e-25	4.72e-24	DOWN
4532389	MSMEG_6678	hypothetical protein	NC_008596.1:6729674-6730159	-1.77482	6.61e-19	7.86e-18	DOWN
4531410	MSMEG_1543	eptc-inducible aldehyde dehydrogenase	NC_008596.1:1633314-1634858	-1.77308	1.36e-26	2.65e-25	DOWN
4533607	MSMEG_3363	TetR family transcriptional regulator	NC_008596.1:3436349-3436951	-1.77259	1.83e-22	2.73e-21	DOWN
4531195	MSMEG_3967	TonB-dependent receptor	NC_008596.1:4035550-4036224	-1.76906	1.17e-05	3.86e-05	DOWN
4532785	MSMEG_3271	dihydroxyacetone kinase	NC_008596.1:3352633-3354375	-1.7685	8.11e-19	9.53e-18	DOWN
4536162	MSMEG_3914	beta-lactamase	NC_008596.1:3982213-3983361	-1.76763	3.27e-26	6.22e-25	DOWN
4533488	MSMEG_5647	pseudo	NC_008596.1:5736254-5736935	-1.76745	5.92e-19	7.06e-18	DOWN
4531080	MSMEG_3521	molybdopterin oxidoreductase	NC_008596.1:3583219-3585468	-1.76459	2.76e-24	4.66e-23	DOWN
4532484	MSMEG_1723	hypothetical protein	NC_008596.1:1818047-1818370	-1.75915	1.1e-11	7.2e-11	DOWN
4531992	ectC	L-ectoine synthase	NC_008596.1:3970964-3971356	-1.75858	1.12e-15	1.02e-14	DOWN
4534818	hypC	hydrogenase assembly chaperone HypC/HupF	NC_008596.1:2776054-2776338	-1.75688	0.00174983	0.00397509	DOWN
4535398	MSMEG_3844	lipid-transfer protein	NC_008596.1:3914803-3916005	-1.75481	3.69e-20	4.7e-19	DOWN
4535715	MSMEG_1724	hypothetical protein	NC_008596.1:1818478-1818885	-1.75101	6.47e-13	4.77e-12	DOWN
4537577	MSMEG_6804	sugar ABC transporter substrate-binding protein	NC_008596.1:6850913-6851911	-1.74819	6.62e-21	8.97e-20	DOWN
4533683	MSMEG_4733	hypothetical protein	NC_008596.1:4832458-4833228	-1.74786	6.03e-17	6.07e-16	DOWN
4535146	MSMEG_2211	DNA-binding protein	NC_008596.1:2291531-2292370	-1.74616	1.87e-15	1.68e-14	DOWN
4533353	MSMEG_5234	short-chain dehydrogenase/reductase SDR	NC_008596.1:5325628-5326398	-1.74612	5.77e-13	4.28e-12	DOWN
4535320	MSMEG_2280	pyruvate dehydrogenase	NC_008596.1:2363217-2364947	-1.74543	3.74e-21	5.15e-20	DOWN
4533998	MSMEG_5992	hypothetical protein	NC_008596.1:6057955-6058920	-1.74516	2.39e-08	1.13e-07	DOWN
4532069	MSMEG_0890	HD domain-containing protein	NC_008596.1:975595-976194	-1.74327	6.45e-17	6.47e-16	DOWN
4537146	MSMEG_5167	major facilitator superfamily protein	NC_008596.1:5268527-5269732	-1.73866	5.42e-22	7.85e-21	DOWN
4533435	MSMEG_3293	hypothetical protein	NC_008596.1:3375012-3375185	-1.73807	0.00216719	0.00484701	DOWN
4532695	MSMEG_3397	acetylornithine deacetylase	NC_008596.1:3467633-3468964	-1.73742	2.53e-16	2.45e-15	DOWN
4536308	MSMEG_5021	alcohol dehydrogenase	NC_008596.1:5117738-5118784	-1.73553	7.65e-08	3.38e-07	DOWN
4536895	MSMEG_3332	TetR family transcriptional regulator	NC_008596.1:3408671-3409429	-1.73474	2.07e-21	2.87e-20	DOWN
4532296	MSMEG_1417	glyoxalase	NC_008596.1:1519642-1520925	-1.7344	2.4e-21	3.32e-20	DOWN
4532551	MSMEG_1749	monooxygenase	NC_008596.1:1841333-1842214	-1.73383	5.12e-21	6.98e-20	DOWN
4531059	hisE	phosphoribosyl-ATP pyrophosphatase	NC_008596.1:4258399-4258680	-1.7325	1.33e-22	2.01e-21	DOWN
4531149	MSMEG_4204	catalase	NC_008596.1:4282640-4283755	-1.73228	1.64e-09	8.85e-09	DOWN
4533611	MSMEG_5994	acyl-CoA dehydrogenase	NC_008596.1:6060080-6061084	-1.7311	1.04e-12	7.54e-12	DOWN
4536506	MSMEG_2651	alkanesulfonate monooxygenase	NC_008596.1:2731781-2732938	-1.72783	7.49e-26	1.39e-24	DOWN
4536950	MSMEG_6473	tetracenomycin polyketide synthesis O-methyltransferase TcmP	NC_008596.1:6537143-6537961	-1.72535	1.08e-20	1.44e-19	DOWN
4534378	cadA	cadmium-translocating P-type ATPase	NC_008596.1:5484398-5486341	-1.72425	1.05e-15	9.62e-15	DOWN
4533142	MSMEG_5554	ANTAR domain-containing protein	NC_008596.1:5643478-5644194	-1.723	1.2e-22	1.81e-21	DOWN
4532495	MSMEG_6305	hypothetical protein	NC_008596.1:6371770-6372138	-1.72261	5.41e-06	1.88e-05	DOWN
4537012	MSMEG_4341	hypothetical protein	NC_008596.1:4430412-4430561	-1.72257	2.14e-09	1.14e-08	DOWN
4534934	MSMEG_1121	hypothetical protein	NC_008596.1:1185840-1186217	-1.72255	0.00136101	0.00316427	DOWN
4531910	MSMEG_6228	hypothetical protein	NC_008596.1:6291559-6292239	-1.7217	2.82e-26	5.39e-25	DOWN
4537017	MSMEG_1773	hypothetical protein	NC_008596.1:1860268-1861290	-1.72148	1.57e-23	2.55e-22	DOWN
4532587	MSMEG_3230	pseudo	NC_008596.1:3311941-3313483	-1.7207	1.75e-27	3.52e-26	DOWN
4531329	MSMEG_0157	oxalyl-CoA decarboxylase	NC_008596.1:179717-181450	-1.71629	3.66e-17	3.76e-16	DOWN
4530867	MSMEG_3853	aliphatic sulfonates transport ATP-binding protein SsuB	NC_008596.1:3924920-3925657	-1.71507	1.33e-06	5.01e-06	DOWN
4532597	MSMEG_0435	allophanate hydrolase subunit 2	NC_008596.1:510873-511757	-1.71053	2.03e-27	4.07e-26	DOWN
4537167	MSMEG_6772	hypothetical protein	NC_008596.1:6820932-6821960	-1.7069	2.16e-19	2.64e-18	DOWN
4531812	MSMEG_0156	LysR family transcriptional regulator	NC_008596.1:178631-179557	-1.70339	7.96e-14	6.35e-13	DOWN
4533536	MSMEG_0603	acyl-CoA dehydrogenase	NC_008596.1:679378-681582	-1.7007	3.69e-22	5.41e-21	DOWN
4534904	MSMEG_6357	hypothetical protein	NC_008596.1:6415525-6415662	-1.69839	0.000553125	0.00137598	DOWN
4533492	MSMEG_1838	cationic amino acid transporter	NC_008596.1:1913166-1914650	-1.69638	8.05e-23	1.24e-21	DOWN
4535759	ligD	DNA polymerase LigD polymerase subunit	NC_008596.1:6367237-6368289	-1.69442	1.16e-20	1.54e-19	DOWN
4532670	MSMEG_6849	LysR family transcriptional regulator	NC_008596.1:6899091-6900023	-1.69193	4.83e-14	3.93e-13	DOWN
4534816	MSMEG_5407	integral membrane protein	NC_008596.1:5487241-5487942	-1.69105	2.89e-17	3e-16	DOWN
4532481	MSMEG_1259	hypothetical protein	NC_008596.1:1347910-1348326	-1.68305	6.95e-14	5.56e-13	DOWN
4534063	msrB	methionine-R-sulfoxide reductase	NC_008596.1:4501718-4502212	-1.68042	0.000233116	0.000620801	DOWN
4533811	MSMEG_6532	transcriptional regulatory protein	NC_008596.1:6590293-6590910	-1.67812	4.09e-11	2.58e-10	DOWN
4536160	MSMEG_1993	MaoC like domain-containing protein	NC_008596.1:2075672-2076505	-1.67782	1.87e-11	1.21e-10	DOWN
4534983	MSMEG_4380	ABC transporter permease	NC_008596.1:4466375-4468300	-1.67605	2.79e-14	2.32e-13	DOWN
4535073	MSMEG_3270	sn-glycerol-3-phosphate ABC transporter ATP-binding protein	NC_008596.1:3351503-3352636	-1.67412	1e-13	7.9e-13	DOWN
4536678	MSMEG_5014	ATPase P	NC_008596.1:5110506-5112737	-1.67137	4.47e-27	8.82e-26	DOWN
4534972	MSMEG_1098	acyl-CoA synthetase	NC_008596.1:1161655-1163274	-1.67081	2.27e-19	2.75e-18	DOWN
4534763	MSMEG_4666	myo-inositol 2-dehydrogenase	NC_008596.1:4752923-4753960	-1.67016	3.65e-12	2.51e-11	DOWN
4536289	MSMEG_6919	hypothetical protein	NC_008596.1:6962147-6963091	-1.66959	4.48e-26	8.43e-25	DOWN
4534957	MSMEG_4536	hypothetical protein	NC_008596.1:4624067-4625287	-1.66863	1.42e-25	2.6e-24	DOWN
4534597	eutB	ethanolamine ammonia-lyase, large subunit	NC_008596.1:1642906-1644321	-1.66817	7.12e-23	1.1e-21	DOWN
4532796	MSMEG_1887	hypothetical protein	NC_008596.1:1966654-1967082	-1.66747	1.76e-19	2.15e-18	DOWN
4531644	MSMEG_1255	UvrD/REP helicase	NC_008596.1:1343125-1345338	-1.66607	3.44e-24	5.76e-23	DOWN
4537056	MSMEG_0730	oleandomycin glycosyltransferase	NC_008596.1:815642-816844	-1.66525	4.82e-17	4.9e-16	DOWN
4537277	MSMEG_2902	hydrolase	NC_008596.1:2964456-2965199	-1.66407	1.02e-22	1.56e-21	DOWN
4536471	MSMEG_4616	pseudo	NC_008596.1:4700449-4700966	-1.66136	1.48e-20	1.96e-19	DOWN
4535489	MSMEG_1883	glycine betaine transporter OpuD	NC_008596.1:1961567-1963423	-1.65659	3.81e-26	7.21e-25	DOWN
4536580	MSMEG_4028	hypothetical protein	NC_008596.1:4100797-4101018	-1.65375	5.68e-10	3.24e-09	DOWN
4534129	MSMEG_0775	metallo-beta-lactamase superfamily protein	NC_008596.1:859776-860522	-1.65246	1.56e-23	2.55e-22	DOWN
4531450	MSMEG_6508	MarR family transcriptional regulator	NC_008596.1:6570166-6570633	-1.65178	5.69e-12	3.79e-11	DOWN
4536500	MSMEG_0653	pseudo	NC_008596.1:734617-735581	-1.65067	4.84e-06	1.69e-05	DOWN
4531905	MSMEG_1794	dehydrogenase	NC_008596.1:1872888-1873895	-1.65064	4.45e-13	3.32e-12	DOWN
4532291	MSMEG_3381	ACP phosphodieterase	NC_008596.1:3452634-3453251	-1.64774	2.13e-23	3.41e-22	DOWN
4533098	MSMEG_6234	hypothetical protein	NC_008596.1:6298376-6299845	-1.64394	1.26e-13	9.88e-13	DOWN
4536353	MSMEG_5648	hypothetical protein	NC_008596.1:5736936-5737325	-1.64243	9.97e-12	6.55e-11	DOWN
4537522	MSMEG_2153	TetR family transcriptional regulator	NC_008596.1:2228170-2228763	-1.64195	1.03e-16	1.01e-15	DOWN
4532483	MSMEG_0155	transcriptional regulator	NC_008596.1:178054-178524	-1.63989	3.88e-19	4.65e-18	DOWN
4534305	MSMEG_5319	alkylhydroperoxidase	NC_008596.1:5408767-5409213	-1.63816	9.09e-10	5.06e-09	DOWN
4536605	MSMEG_0122	periplasmic solute-binding protein	NC_008596.1:143535-144542	-1.63553	4.01e-08	1.84e-07	DOWN
4536450	MSMEG_3402	cytosine permease	NC_008596.1:3474657-3476018	-1.6347	1.74e-12	1.23e-11	DOWN
4534530	galT	galactose-1-phosphate uridylyltransferase	NC_008596.1:3755928-3757010	-1.63415	9.43e-18	1.03e-16	DOWN
4533573	MSMEG_6380	hypothetical protein	NC_008596.1:6434002-6434412	-1.63186	2.48e-15	2.22e-14	DOWN
4533070	MSMEG_3349	trap dicarboxylate transporter dctq subunit	NC_008596.1:3425207-3425725	-1.63154	8.88e-05	0.000253403	DOWN
4535780	MSMEG_5307	TetR family transcriptional regulator	NC_008596.1:5397936-5398649	-1.63014	6.85e-25	1.19e-23	DOWN
4534846	MSMEG_0800	hypothetical protein	NC_008596.1:886332-886511	-1.62969	4.65e-06	1.63e-05	DOWN
4534295	MSMEG_2224	acetyl-CoA C-acyltransferase	NC_008596.1:2303045-2304229	-1.62916	2.99e-17	3.1e-16	DOWN
4533608	MSMEG_1668	pyridoxamine 5'-phosphate oxidase	NC_008596.1:1761933-1762454	-1.62835	2.3e-09	1.22e-08	DOWN
4532549	MSMEG_0529	serine/threonine protein kinase	NC_008596.1:607494-610940	-1.62769	1.21e-20	1.61e-19	DOWN
4532756	MSMEG_5555	pseudo	NC_008596.1:5644287-5645176	-1.62606	1.48e-19	1.82e-18	DOWN
4533561	MSMEG_3406	TetR family transcriptional regulator	NC_008596.1:3479977-3480570	-1.62516	2.43e-14	2.02e-13	DOWN
4536197	MSMEG_0151	PntAB protein	NC_008596.1:173931-174254	-1.62465	0.0157083	0.0292965	DOWN
4532724	MSMEG_0493	hypothetical protein	NC_008596.1:572636-572803	-1.62464	8.54e-20	1.06e-18	DOWN
4536868	MSMEG_2851	hypothetical protein	NC_008596.1:2913944-2914399	-1.62464	2.71e-15	2.42e-14	DOWN
4537442	MSMEG_3687	acyl-CoA synthetase	NC_008596.1:3751261-3752916	-1.62339	3.13e-24	5.25e-23	DOWN
4536200	MSMEG_4141	hypothetical protein	NC_008596.1:4221338-4222225	-1.62334	2.09e-24	3.54e-23	DOWN
4537231	MSMEG_6336	hypothetical protein	NC_008596.1:6400335-6400700	-1.62238	4.22e-17	4.32e-16	DOWN
4532147	MSMEG_2035	amine oxidase	NC_008596.1:2113659-2115026	-1.62079	1.76e-20	2.3e-19	DOWN
4533403	MSMEG_0668	integral membrane protein	NC_008596.1:752138-752347	-1.62026	1.28e-14	1.09e-13	DOWN
4532053	MSMEG_5410	radical SAM domain-containing protein	NC_008596.1:5489368-5490936	-1.61933	7.56e-17	7.55e-16	DOWN
4536502	MSMEG_0354	hypothetical protein	NC_008596.1:392616-392957	-1.61642	0.000305063	0.000795509	DOWN
4532508	MSMEG_3268	ABC transporter permease	NC_008596.1:3349525-3350397	-1.61487	4.96e-11	3.1e-10	DOWN
4535281	MSMEG_0704	LpqJ protein	NC_008596.1:792264-792803	-1.61437	4.03e-21	5.53e-20	DOWN
4534326	MSMEG_2049	TetR family transcriptional regulator	NC_008596.1:2127094-2127675	-1.61426	1.54e-14	1.29e-13	DOWN
4532264	MSMEG_3522	dopamine receptor D4	NC_008596.1:3585553-3585981	-1.61342	1.73e-14	1.45e-13	DOWN
4530887	thpD	ectoine hydroxylase	NC_008596.1:3970017-3970934	-1.61261	2.37e-19	2.86e-18	DOWN
4534592	MSMEG_2912	inner membrane metabolite transporter YdfJ	NC_008596.1:2974935-2976311	-1.61001	2.97e-08	1.39e-07	DOWN
4531493	MSMEG_1855	hypothetical protein	NC_008596.1:1932788-1933810	-1.61	2.25e-17	2.36e-16	DOWN
4535141	MSMEG_6578	hypothetical protein	NC_008596.1:6632857-6632961	-1.60481	0.0034889	0.00744911	DOWN
4531729	MSMEG_6558	enoyl-CoA hydratase	NC_008596.1:6612886-6613542	-1.60254	2.13e-18	2.43e-17	DOWN
4534506	MSMEG_3890	proteasome component	NC_008596.1:3962479-3963837	-1.59751	1.81e-24	3.09e-23	DOWN
4532077	MSMEG_4547	acyl-CoA dehydrogenase	NC_008596.1:4637637-4638872	-1.5956	1.09e-20	1.46e-19	DOWN
4536226	MSMEG_1751	norsolorinic acid reductase	NC_008596.1:1842253-1843281	-1.59549	3.33e-20	4.27e-19	DOWN
4531954	MSMEG_6574	hypothetical protein	NC_008596.1:6628925-6629410	-1.59443	1.46e-19	1.8e-18	DOWN
4533750	MSMEG_4126	hydrolase, isochorismatase	NC_008596.1:4207206-4207916	-1.59249	3.98e-17	4.08e-16	DOWN
4536949	MSMEG_0893	hypothetical protein	NC_008596.1:978024-978347	-1.5915	5.77e-06	1.99e-05	DOWN
4535713	MSMEG_3551	linalool 8-monooxygenase	NC_008596.1:3610192-3611469	-1.59095	1.26e-17	1.35e-16	DOWN
4537645	MSMEG_2098	fumarylacetoacetate hydrolase	NC_008596.1:2174138-2175013	-1.58993	6.58e-08	2.94e-07	DOWN
4535831	MSMEG_1384	hypothetical protein	NC_008596.1:1487074-1487475	-1.58822	1.46e-09	7.92e-09	DOWN
4535257	MSMEG_1801	hypothetical protein	NC_008596.1:1880491-1880622	-1.58727	0.000428594	0.0010911	DOWN
4535330	eat	ethanolamine permease	NC_008596.1:1641497-1642909	-1.585	5.54e-22	8e-21	DOWN
4531365	MSMEG_1979	antibiotic biosynthesis monooxygenase	NC_008596.1:2061539-2061880	-1.58306	3.73e-09	1.94e-08	DOWN
4531371	MSMEG_0859	TetR family transcriptional regulator	NC_008596.1:939739-940752	-1.5827	2.04e-22	3.03e-21	DOWN
4534706	MSMEG_5577	fructokinase	NC_008596.1:5665848-5666768	-1.58058	1.09e-17	1.18e-16	DOWN
4532998	MSMEG_4300	transcription regulator AmtR	NC_008596.1:4388435-4389112	-1.5798	1.45e-14	1.22e-13	DOWN
4536121	MSMEG_3431	choline dehydrogenase	NC_008596.1:3501834-3502136	-1.57521	7.75e-09	3.86e-08	DOWN
4534449	MSMEG_3947	6-phosphofructokinase	NC_008596.1:4017452-4018450	-1.5684	7.86e-21	1.06e-19	DOWN
4531740	MSMEG_5401	hypothetical protein	NC_008596.1:5481135-5481614	-1.56795	6.32e-08	2.83e-07	DOWN
4530888	MSMEG_2923	dehydrogenase/reductase SDR family protein member 1	NC_008596.1:2986362-2987162	-1.56491	1.25e-15	1.14e-14	DOWN
4536944	nadE	NAD synthetase	NC_008596.1:4700974-4703016	-1.55982	2.24e-23	3.59e-22	DOWN
4532493	MSMEG_1982	acyl-CoA synthetase	NC_008596.1:2063768-2065315	-1.55977	1.7e-20	2.23e-19	DOWN
4530876	MSMEG_1155	carnitinyl-CoA dehydratase	NC_008596.1:1218716-1219522	-1.55756	7.17e-05	0.000208694	DOWN
4534654	MSMEG_5991	MaoC like domain-containing protein	NC_008596.1:6057560-6057973	-1.55755	0.00358721	0.00763503	DOWN
4535225	MSMEG_4649	phytanoyl-CoA dioxygenase	NC_008596.1:4736191-4737387	-1.55753	7.39e-06	2.51e-05	DOWN
4533866	MSMEG_1737	RNA pseudouridine synthase	NC_008596.1:1830802-1831677	-1.5573	7.68e-23	1.18e-21	DOWN
4536440	MSMEG_4362	universal stress protein family protein	NC_008596.1:4449005-4449823	-1.55485	2.65e-18	3e-17	DOWN
4532240	MSMEG_5287	dehydrogenase	NC_008596.1:5377718-5378761	-1.5534	8.83e-22	1.26e-20	DOWN
4535058	MSMEG_4360	hypothetical protein	NC_008596.1:4447509-4448855	-1.55059	4.32e-17	4.41e-16	DOWN
4532955	MSMEG_6093	hypothetical protein	NC_008596.1:6155687-6156166	-1.55044	1.16e-09	6.4e-09	DOWN
4531824	MSMEG_4035	citrate synthase	NC_008596.1:4106113-4106928	-1.55	2.83e-09	1.49e-08	DOWN
4535878	MSMEG_2370	DoxX subfamily protein	NC_008596.1:2452620-2453462	-1.54965	3.98e-23	6.27e-22	DOWN
4532907	MSMEG_4059	haloacid dehalogenase	NC_008596.1:4131375-4132064	-1.54858	1.59e-08	7.68e-08	DOWN
4536840	MSMEG_2954	LacI family transcriptional regulator	NC_008596.1:3014135-3015154	-1.54477	8.11e-17	8.03e-16	DOWN
4531157	MSMEG_3442	cyclohexadienyl dehydratase	NC_008596.1:3511367-3512173	-1.54257	2.38e-18	2.7e-17	DOWN
4531902	MSMEG_0389	glycosyl transferase family protein	NC_008596.1:438130-439398	-1.54244	6.33e-22	9.11e-21	DOWN
4535622	MSMEG_4342	metallo-beta-lactamase	NC_008596.1:4429796-4430428	-1.5415	2.74e-20	3.54e-19	DOWN
4536932	MSMEG_2122	dihydroxyacetone kinase subunit DhaL	NC_008596.1:2200199-2200831	-1.5401	4.09e-12	2.8e-11	DOWN
4533018	MSMEG_0393	Fmt protein	NC_008596.1:443164-443967	-1.53918	1.39e-18	1.61e-17	DOWN
4531982	MSMEG_4456	hypothetical protein	NC_008596.1:4535851-4536666	-1.53855	6.43e-14	5.18e-13	DOWN
4532896	MSMEG_2879	acyl-CoA dehydrogenase	NC_008596.1:2940823-2941974	-1.53815	4.52e-08	2.06e-07	DOWN
4535969	MSMEG_0304	acyl-CoA synthetase	NC_008596.1:335465-337096	-1.53612	6.57e-18	7.28e-17	DOWN
4533781	MSMEG_5154	hypothetical protein	NC_008596.1:5258052-5258201	-1.53601	5.91e-20	7.46e-19	DOWN
4532482	MSMEG_0536	intracellular protease PfpI family protein	NC_008596.1:616498-617064	-1.53504	2.51e-22	3.7e-21	DOWN
4535889	MSMEG_0932	ROK family protein	NC_008596.1:1012561-1013760	-1.53298	1.03e-22	1.57e-21	DOWN
4536025	MSMEG_6478	cytochrome P450	NC_008596.1:6540573-6541916	-1.53002	1.57e-21	2.21e-20	DOWN
4535600	MSMEG_4107	phosphoglycerate mutase	NC_008596.1:4185948-4186634	-1.52897	2.22e-09	1.18e-08	DOWN
4532198	MSMEG_3598	periplasmic sugar-binding proteins	NC_008596.1:3662144-3663193	-1.52602	1.79e-15	1.62e-14	DOWN
4533817	MSMEG_0673	hypothetical protein	NC_008596.1:755982-756524	-1.5235	5.75e-21	7.81e-20	DOWN
4531961	MSMEG_0438	periplasmic binding protein	NC_008596.1:513215-514168	-1.52342	3.67e-20	4.68e-19	DOWN
4537598	MSMEG_3578	cyclase	NC_008596.1:3638039-3640156	-1.52318	4.13e-14	3.38e-13	DOWN
4531016	MSMEG_4007	oxidoreductase, 2OG-Fe(II) oxygenase	NC_008596.1:4081401-4082390	-1.52139	1.5e-16	1.46e-15	DOWN
4532861	MSMEG_2466	glutaryl-CoA dehydrogenase	NC_008596.1:2546004-2547203	-1.52077	4.24e-08	1.94e-07	DOWN
4533107	MSMEG_4057	GntR family transcriptional regulator	NC_008596.1:4129302-4129928	-1.518	3.51e-17	3.61e-16	DOWN
4534543	MSMEG_3822	GntR family transcriptional regulator	NC_008596.1:3891418-3892152	-1.5152	1.07e-14	9.17e-14	DOWN
4535173	MSMEG_0545	LuxR family transcriptional regulator	NC_008596.1:622986-623513	-1.51509	9.12e-11	5.6e-10	DOWN
4532065	MSMEG_5164	zinc-binding alcohol dehydrogenase	NC_008596.1:5265330-5266328	-1.51509	9.12e-14	7.24e-13	DOWN
4537732	MSMEG_5351	hypothetical protein	NC_008596.1:5435376-5435558	-1.51372	6.1e-10	3.45e-09	DOWN
4533715	MSMEG_6768	halogenase	NC_008596.1:6816577-6818328	-1.51237	4.68e-12	3.17e-11	DOWN
4531635	MSMEG_5604	integral membrane protein	NC_008596.1:5689743-5690408	-1.51173	6.27e-06	2.16e-05	DOWN
4533824	MSMEG_1073	short chain dehydrogenase	NC_008596.1:1139384-1140298	-1.51136	6.96e-20	8.71e-19	DOWN
4535711	MSMEG_0158	formyl-coenzyme A transferase	NC_008596.1:181519-182781	-1.51057	2.65e-16	2.55e-15	DOWN
4532957	MSMEG_1977	alcohol dehydrogenase	NC_008596.1:2058811-2059836	-1.50976	5.21e-14	4.22e-13	DOWN
4535634	MSMEG_1002	IS1096, tnpR protein	NC_008596.1:1072393-1073094	-1.50861	0.00736698	0.0147353	DOWN
4534915	MSMEG_0608	glyoxalase	NC_008596.1:684535-685134	-1.50635	1.33e-18	1.55e-17	DOWN
4535157	MSMEG_1154	formyl-coenzyme A transferase	NC_008596.1:1217538-1218719	-1.50542	2.17e-07	9.07e-07	DOWN
4535574	MSMEG_0778	transcriptional regulator	NC_008596.1:861746-862510	-1.50106	7.27e-21	9.8e-20	DOWN
4535782	MSMEG_3396	IclR family transcriptional regulator	NC_008596.1:3466818-3467594	-1.50008	7.76e-18	8.53e-17	DOWN
4535361	MSMEG_5077	integral membrane protein	NC_008596.1:5177093-5177767	-1.49845	2.1e-11	1.35e-10	DOWN
4535437	MSMEG_5229	hypothetical protein	NC_008596.1:5322977-5323501	-1.4983	3.69e-08	1.7e-07	DOWN
4532775	MSMEG_1779	hypothetical protein	NC_008596.1:1865313-1865714	-1.49611	8.4e-05	0.000240664	DOWN
4534817	MSMEG_2536	3-oxoacyl-ACP reductase	NC_008596.1:2621453-2622208	-1.49611	8.4e-05	0.000240664	DOWN
4531744	MSMEG_4710	branched-chain alpha-keto acid dehydrogenase subunit E2	NC_008596.1:4800165-4801385	-1.49513	1.72e-15	1.56e-14	DOWN
4532559	MSMEG_5569	clavaldehyde dehydrogenase	NC_008596.1:5655917-5656684	-1.4944	8.95e-15	7.71e-14	DOWN
4533714	MSMEG_2341	hypothetical protein	NC_008596.1:2422408-2422818	-1.49407	1.18e-05	3.87e-05	DOWN
4533219	MSMEG_5355	hypothetical protein	NC_008596.1:5437985-5438560	-1.49377	2.7e-18	3.06e-17	DOWN
4533031	MSMEG_1747	RNA polymerase sigma-70 factor	NC_008596.1:1840251-1840865	-1.49193	1.67e-05	5.35e-05	DOWN
4535032	MSMEG_1262	hypothetical protein	NC_008596.1:1351351-1351716	-1.49041	1.03e-08	5.06e-08	DOWN
4536569	MSMEG_0564	xanthine/uracil permease	NC_008596.1:638914-640326	-1.49035	6.76e-19	8e-18	DOWN
4532850	MSMEG_1716	IS3 family protein element, transposase orfA	NC_008596.1:1812681-1812956	-1.48857	1.54e-07	6.58e-07	DOWN
4536428	katG	catalase/peroxidase HPI	NC_008596.1:3526916-3529162	-1.48824	4.61e-21	6.32e-20	DOWN
4532451	ltrA	low temperature requirement protein LtrA	NC_008596.1:4869751-4871082	-1.48689	5.27e-16	4.94e-15	DOWN
4534693	MSMEG_0807	leupeptin-inactivating enzyme 1	NC_008596.1:892151-893602	-1.4863	2.19e-19	2.66e-18	DOWN
4536632	MSMEG_6793	hypothetical protein	NC_008596.1:6841426-6842814	-1.48604	3.5e-12	2.42e-11	DOWN
4536368	MSMEG_4121	GntR family transcriptional regulator	NC_008596.1:4201359-4202099	-1.48525	7.4e-19	8.72e-18	DOWN
4531307	pcaC	4-carboxymuconolactone decarboxylase	NC_008596.1:2686214-2686618	-1.48257	1.36e-09	7.39e-09	DOWN
4531108	MSMEG_3709	hypothetical protein	NC_008596.1:3774749-3776077	-1.48242	2.52e-12	1.76e-11	DOWN
4530877	MSMEG_5566	transcriptional regulator	NC_008596.1:5653799-5654224	-1.48239	7.35e-16	6.8e-15	DOWN
4534462	MSMEG_3365	AraC family transcriptional regulator	NC_008596.1:3437657-3438670	-1.4822	5.28e-14	4.28e-13	DOWN
4531609	MSMEG_1000	hypothetical protein	NC_008596.1:1069356-1069922	-1.4816	0.00446767	0.00932682	DOWN
4530895	MSMEG_3358	YaeQ protein	NC_008596.1:3432244-3432795	-1.48112	2.14e-16	2.08e-15	DOWN
4532326	MSMEG_1793	membrane protein	NC_008596.1:1873863-1874426	-1.48037	1.11e-05	3.66e-05	DOWN
4534607	MSMEG_6579	hypothetical protein	NC_008596.1:6633239-6633637	-1.47506	3.55e-13	2.7e-12	DOWN
4531347	MSMEG_6345	hypothetical protein	NC_008596.1:6407908-6408258	-1.47348	1.51e-17	1.61e-16	DOWN
4533378	MSMEG_5300	short-chain type dehydrogenase/reductase	NC_008596.1:5389451-5390179	-1.47213	2.68e-11	1.7e-10	DOWN
4531013	MSMEG_3462	oxidoreductase	NC_008596.1:3529328-3529993	-1.46639	3.31e-07	1.35e-06	DOWN
4534284	MSMEG_1216	ABC transporter periplasmic protein	NC_008596.1:1285707-1287002	-1.46631	4.36e-12	2.97e-11	DOWN
4535136	MSMEG_2039	transcriptional regulator	NC_008596.1:2117665-2118420	-1.46452	7.91e-16	7.31e-15	DOWN
4534330	MSMEG_2512	lactate 2-monooxygenase	NC_008596.1:2597267-2598430	-1.46348	8.46e-17	8.35e-16	DOWN
4532012	MSMEG_1102	twin-arginine translocation pathway signal	NC_008596.1:1165456-1167066	-1.46243	6.89e-13	5.05e-12	DOWN
4534606	MSMEG_1193	TROVE domain-containing protein	NC_008596.1:1259580-1261274	-1.46186	5.51e-21	7.5e-20	DOWN
4531022	MSMEG_0353	hypothetical protein	NC_008596.1:392047-392592	-1.46003	2.41e-07	1e-06	DOWN
4533627	MSMEG_2650	acyl-CoA dehydrogenase	NC_008596.1:2730551-2731765	-1.45947	1.25e-17	1.35e-16	DOWN
4536459	MSMEG_6017	aspartate aminotransferase	NC_008596.1:6081669-6082838	-1.45888	2.11e-14	1.76e-13	DOWN
4531406	MSMEG_4045	muconolactone delta-isomerase	NC_008596.1:4117738-4118019	-1.45799	0.0106133	0.0205915	DOWN
4537194	MSMEG_1932	MmpS3 protein	NC_008596.1:2010476-2011300	-1.45746	3.1e-20	3.99e-19	DOWN
4532630	MSMEG_1561	LysR family transcriptional regulator	NC_008596.1:1651286-1652176	-1.45674	8.48e-16	7.82e-15	DOWN
4531424	MSMEG_0799	hypothetical protein	NC_008596.1:885893-886069	-1.45409	1.77e-07	7.49e-07	DOWN
4530956	MSMEG_1505	integral membrane protein	NC_008596.1:1596886-1597764	-1.45256	1.03e-11	6.78e-11	DOWN
4537653	MSMEG_6240	hypothetical protein	NC_008596.1:6304953-6306446	-1.45255	7.1e-13	5.2e-12	DOWN
4534541	MSMEG_0436	allophanate hydrolase subunit 1	NC_008596.1:511773-512405	-1.45099	3.98e-20	5.05e-19	DOWN
4536530	MSMEG_3013	transcriptional regulator family protein	NC_008596.1:3082878-3083348	-1.44989	1.29e-14	1.1e-13	DOWN
4533469	MSMEG_1848	pseudo	NC_008596.1:1921966-1925233	-1.4488	2.2e-17	2.31e-16	DOWN
4532742	hypE	hydrogenase expression/formation protein HypE	NC_008596.1:2357919-2358992	-1.44866	6.18e-20	7.78e-19	DOWN
4536441	MSMEG_0053	hypothetical protein	NC_008596.1:72820-74208	-1.44663	1.17e-18	1.37e-17	DOWN
4534974	MSMEG_5993	acyl-CoA dehydrogenase	NC_008596.1:6058917-6060080	-1.44581	2.28e-09	1.21e-08	DOWN
4535060	hisD	histidinol dehydrogenase	NC_008596.1:5745996-5747351	-1.44431	2.24e-07	9.34e-07	DOWN
4532430	MSMEG_2537	transporter protein	NC_008596.1:2622262-2623653	-1.44357	4.48e-09	2.31e-08	DOWN
4534186	MSMEG_1210	hypothetical protein	NC_008596.1:1279842-1280711	-1.43871	1.79e-17	1.89e-16	DOWN
4534738	MSMEG_3015	hypothetical protein	NC_008596.1:3083882-3084628	-1.4387	4.56e-18	5.12e-17	DOWN
4530965	MSMEG_6131	magnesium or manganese-dependent protein phosphatase	NC_008596.1:6192886-6194094	-1.43693	8.44e-19	9.9e-18	DOWN
4536464	MSMEG_2900	2-hydroxy-6-oxo-6-phenylhexa-2,4-dienoate hydrolase	NC_008596.1:2963487-2964347	-1.43501	1.42e-15	1.3e-14	DOWN
4532350	MSMEG_3959	transcriptional regulator	NC_008596.1:4029539-4030411	-1.4337	6.18e-16	5.76e-15	DOWN
4536306	MSMEG_3386	shikimate transporter	NC_008596.1:3455477-3456817	-1.432	3.2e-14	2.64e-13	DOWN
4530945	MSMEG_4734	hypothetical protein	NC_008596.1:4833240-4835093	-1.43146	1.04e-17	1.13e-16	DOWN
4533278	cysNC	bifunctional sulfate adenylyltransferase subunit 1/adenylylsulfate kinase	NC_008596.1:5072493-5074346	-1.43021	1.56e-18	1.79e-17	DOWN
4535631	MSMEG_0198	acyl-CoA dehydrogenase	NC_008596.1:222803-223936	-1.42893	3.18e-06	1.14e-05	DOWN
4536228	MSMEG_2159	hypothetical protein	NC_008596.1:2232790-2233644	-1.42863	6.72e-06	2.3e-05	DOWN
4531978	MSMEG_4897	tRNA	NC_008596.1:4992841-4992927	-1.42827	1.93e-05	6.11e-05	DOWN
4535351	MSMEG_2687	3-ketoacyl-ACP reductase	NC_008596.1:2764345-2765172	-1.42822	1.03e-17	1.12e-16	DOWN
4536209	MSMEG_4601	AraC family transcriptional regulator	NC_008596.1:4690381-4691154	-1.42695	3.81e-10	2.2e-09	DOWN
4531750	fabG	3-ketoacyl-ACP reductase	NC_008596.1:1512243-1513094	-1.42574	4.28e-14	3.49e-13	DOWN
4532033	MSMEG_3917	hypothetical protein	NC_008596.1:3985843-3986388	-1.42246	8.66e-17	8.53e-16	DOWN
4535066	rfbC	dTDP-4-dehydrorhamnose 3,5-epimerase	NC_008596.1:6040647-6041201	-1.4191	6.27e-07	2.46e-06	DOWN
4534362	MSMEG_1885	2Fe-2S iron-sulfur cluster binding domain-containing protein	NC_008596.1:1963982-1965133	-1.41872	1.87e-19	2.28e-18	DOWN
4537156	MSMEG_5865	hypothetical protein	NC_008596.1:5930884-5931423	-1.41733	3.45e-07	1.4e-06	DOWN
4533443	MSMEG_0674	ErfK/YbiS/YcfS/YnhG family protein	NC_008596.1:756845-757855	-1.41376	4.94e-18	5.51e-17	DOWN
4536132	MSMEG_1140	NAD(P)H-dependent glycerol-3-phosphate dehydrogenase	NC_008596.1:1201699-1202724	-1.41314	1.64e-13	1.28e-12	DOWN
4535938	MSMEG_1770	hypothetical protein	NC_008596.1:1858875-1859117	-1.41156	8.16e-16	7.53e-15	DOWN
4531001	MSMEG_4046	L-carnitine dehydratase/bile acid-inducible protein F	NC_008596.1:4118016-4119176	-1.41069	1.55e-07	6.62e-07	DOWN
4533682	MSMEG_5931	short chain dehydrogenase	NC_008596.1:5991078-5991860	-1.41066	3.65e-05	0.000110966	DOWN
4533775	MSMEG_2270	hypothetical protein	NC_008596.1:2352162-2352983	-1.40967	3.12e-17	3.22e-16	DOWN
4535473	MSMEG_3400	glutamyl-tRNA(Gln) amidotransferase subunit A	NC_008596.1:3471648-3473846	-1.40742	9.45e-14	7.49e-13	DOWN
4534396	MSMEG_4545	extracellular solute-binding protein	NC_008596.1:4634344-4636113	-1.40427	6.96e-09	3.49e-08	DOWN
4533111	MSMEG_2915	sensor histidine kinase	NC_008596.1:2978144-2979652	-1.40377	1.57e-10	9.36e-10	DOWN
4534731	MSMEG_4340	NAD/mycothiol-dependent formaldehyde dehydrogenase	NC_008596.1:4428679-4429770	-1.40334	6.97e-19	8.24e-18	DOWN
4534894	MSMEG_4301	fatty-acid--CoA ligase	NC_008596.1:4389120-4390904	-1.40003	1.21e-18	1.4e-17	DOWN
4537355	MSMEG_3599	LacI family transcriptional regulator	NC_008596.1:3663228-3664277	-1.39987	1.45e-14	1.23e-13	DOWN
4537582	MSMEG_0494	hypothetical protein	NC_008596.1:573002-573169	-1.39819	1.01e-06	3.85e-06	DOWN
4534803	MSMEG_3701	hypothetical protein	NC_008596.1:3765299-3766309	-1.39745	3.8e-08	1.75e-07	DOWN
4535613	MSMEG_0713	MerR family transcriptional regulator	NC_008596.1:800492-800851	-1.39645	7.8e-18	8.55e-17	DOWN
4535245	MSMEG_5346	TetR family transcriptional regulator	NC_008596.1:5429236-5429868	-1.39616	1.55e-10	9.27e-10	DOWN
4536917	MSMEG_6406	N-acetylmuramoyl-L-alanine amidase	NC_008596.1:6477408-6479018	-1.3958	6.67e-19	7.92e-18	DOWN
4535354	MSMEG_4742	clavaldehyde dehydrogenase	NC_008596.1:4844394-4845170	-1.39515	1.99e-15	1.79e-14	DOWN
4534373	MSMEG_0546	hypothetical protein	NC_008596.1:623786-624613	-1.39229	1.28e-17	1.37e-16	DOWN
4535333	MSMEG_0538	MarR family transcriptional regulator	NC_008596.1:617579-618070	-1.39215	5.31e-19	6.35e-18	DOWN
4535664	MSMEG_0967	hypothetical protein	NC_008596.1:1040090-1040470	-1.39107	9.59e-07	3.68e-06	DOWN
4536854	MSMEG_2914	L-idonate 5-dehydrogenase	NC_008596.1:2976308-2977282	-1.39093	1.26e-11	8.22e-11	DOWN
4533327	MSMEG_0633	PAP2 superfamily protein	NC_008596.1:714718-716181	-1.38974	9.51e-18	1.04e-16	DOWN
4531474	MSMEG_2152	pseudo	NC_008596.1:2227457-2228022	-1.38942	1.88e-09	1e-08	DOWN
4531133	MSMEG_3414	hypothetical protein	NC_008596.1:3486061-3487176	-1.38902	2.07e-13	1.61e-12	DOWN
4532120	MSMEG_3965	hypothetical protein	NC_008596.1:4034909-4035196	-1.38764	0.0138176	0.0261074	DOWN
4533282	MSMEG_4792	virulence factor mce family protein	NC_008596.1:4892576-4893052	-1.38764	0.0138176	0.0261074	DOWN
4535024	MSMEG_0604	glyoxylate reductase	NC_008596.1:681693-682661	-1.3876	2.23e-08	1.06e-07	DOWN
4536992	MSMEG_6130	two-component sensor protein	NC_008596.1:6191312-6192889	-1.38737	8.24e-17	8.15e-16	DOWN
4533954	MSMEG_3456	hydroxylaminobenzene mutase	NC_008596.1:3521554-3521997	-1.38692	1.45e-13	1.14e-12	DOWN
4537465	MSMEG_4832	acyl-CoA dehydrogenase	NC_008596.1:4928318-4929466	-1.38632	8.48e-14	6.76e-13	DOWN
4533605	MSMEG_3407	epoxide hydrolase	NC_008596.1:3480577-3481794	-1.38458	3.74e-13	2.83e-12	DOWN
4533845	MSMEG_5504	hypothetical protein	NC_008596.1:5588558-5589319	-1.38437	1.3e-11	8.47e-11	DOWN
4534071	MSMEG_2718	(Fe-S)-binding protein	NC_008596.1:2787037-2787960	-1.38197	5.88e-05	0.00017365	DOWN
4531479	MSMEG_2121	multiphosphoryl transfer protein (MTP)	NC_008596.1:2197776-2200202	-1.38171	1.32e-13	1.04e-12	DOWN
4536969	MSMEG_0433	nitrite extrusion protein	NC_008596.1:508691-510100	-1.38152	4.77e-10	2.73e-09	DOWN
4536775	MSMEG_2068	hypothetical protein	NC_008596.1:2145479-2145835	-1.37973	4.37e-06	1.54e-05	DOWN
4532259	MSMEG_2953	ethyl tert-butyl ether degradation EthD	NC_008596.1:3013795-3014115	-1.37931	1.02e-12	7.4e-12	DOWN
4535297	MSMEG_0602	hypothetical protein	NC_008596.1:678969-679124	-1.37922	1.39e-14	1.18e-13	DOWN
4535997	MSMEG_6581	short chain dehydrogenase	NC_008596.1:6634284-6634952	-1.37875	8.24e-11	5.07e-10	DOWN
4531599	MSMEG_5079	hypothetical protein	NC_008596.1:5177781-5178398	-1.378	4.01e-13	3.02e-12	DOWN
4532819	MSMEG_4713	HpcH/HpaI aldolase/citrate lyase	NC_008596.1:4803784-4804593	-1.37762	7.14e-11	4.41e-10	DOWN
4535197	MSMEG_2128	malonyl CoA decarboxylase	NC_008596.1:2204236-2204883	-1.37718	1.11e-10	6.73e-10	DOWN
4532603	MSMEG_1412	amino acid permease	NC_008596.1:1514075-1515580	-1.37696	1.82e-08	8.69e-08	DOWN
4536783	MSMEG_3527	HTH-type transcriptional regulator	NC_008596.1:3589470-3590201	-1.37608	1.3e-12	9.31e-12	DOWN
4537253	MSMEG_4064	zinc-binding alcohol dehydrogenase	NC_008596.1:4136734-4137735	-1.37325	4.56e-15	3.99e-14	DOWN
4535133	MSMEG_2506	carboxyvinyl-carboxyphosphonate phosphorylmutase	NC_008596.1:2591193-2592062	-1.37275	4.79e-07	1.91e-06	DOWN
4533622	MSMEG_6303	para-nitrobenzyl esterase	NC_008596.1:6370453-6371685	-1.37193	6.62e-15	5.74e-14	DOWN
4534329	MSMEG_2911	integral membrane transporter	NC_008596.1:2973561-2974910	-1.37184	1.48e-07	6.35e-07	DOWN
4537336	MSMEG_4811	hypothetical protein	NC_008596.1:4910179-4910643	-1.36917	2.82e-10	1.65e-09	DOWN
4531591	MSMEG_1060	Lsr2 protein	NC_008596.1:1127726-1128130	-1.36863	1.63e-18	1.88e-17	DOWN
4534025	MSMEG_3347	nitrilase/cyanide hydratase and apolipoprotein N-acyltransferase	NC_008596.1:3423311-3424108	-1.36848	7.53e-07	2.92e-06	DOWN
4532859	MSMEG_2874	hypothetical protein	NC_008596.1:2936210-2937286	-1.36786	5.57e-06	1.93e-05	DOWN
4533524	MSMEG_5231	hypothetical protein	NC_008596.1:5323876-5324085	-1.36664	4.02e-08	1.84e-07	DOWN
4537081	MSMEG_2955	hypothetical protein	NC_008596.1:3015273-3015719	-1.36648	2.13e-08	1.01e-07	DOWN
4532028	MSMEG_3845	hypothetical protein	NC_008596.1:3916139-3916366	-1.36407	2.64e-08	1.24e-07	DOWN
4536983	MSMEG_1999	hypothetical protein	NC_008596.1:2081235-2081378	-1.36348	2.93e-18	3.3e-17	DOWN
4531884	MSMEG_6719	epoxide hydrolase	NC_008596.1:6767501-6768358	-1.36302	3.64e-05	0.000110476	DOWN
4537037	MSMEG_3629	hypothetical protein	NC_008596.1:3690396-3691169	-1.36117	2.58e-15	2.3e-14	DOWN
4536011	MSMEG_5409	hypothetical protein	NC_008596.1:5489073-5489366	-1.35959	3.25e-07	1.33e-06	DOWN
4533341	MSMEG_4706	tRNA	NC_008596.1:4797480-4797552	-1.35957	0.0119491	0.0229222	DOWN
4534037	MSMEG_0777	F420-dependent glucose-6-phosphate dehydrogenase	NC_008596.1:860554-861567	-1.35847	3.03e-18	3.41e-17	DOWN
4535530	ftsW	cell division protein FtsW	NC_008596.1:4308690-4310396	-1.35845	1.29e-17	1.38e-16	DOWN
4537234	MSMEG_2916	DNA-binding response regulator, PhoP family protein	NC_008596.1:2979652-2980419	-1.35822	6.23e-10	3.52e-09	DOWN
4531555	hypD	hydrogenase expression/formation protein HypD	NC_008596.1:2356823-2357926	-1.35774	7.4e-18	8.15e-17	DOWN
4535811	MSMEG_5644	membrane protein	NC_008596.1:5732558-5734564	-1.35761	1e-13	7.92e-13	DOWN
4536181	tylF	macrocin-O-methyltransferase	NC_008596.1:437374-438096	-1.35538	2.29e-17	2.39e-16	DOWN
4536554	MSMEG_4714	MoaC domain-containing protein	NC_008596.1:4804593-4805081	-1.35522	2.82e-09	1.48e-08	DOWN
4536401	MSMEG_4205	transcriptional regulator	NC_008596.1:4283833-4286454	-1.35518	2.7e-10	1.58e-09	DOWN
4536001	MSMEG_0270	aminoglycoside phosphotransferase	NC_008596.1:304140-305144	-1.35449	1.04e-13	8.18e-13	DOWN
4535339	MSMEG_4219	hypothetical protein	NC_008596.1:4301451-4302095	-1.35441	4.59e-18	5.15e-17	DOWN
4535131	MSMEG_5570	ATP-dependent DNA ligase	NC_008596.1:5656824-5659091	-1.35355	4.97e-14	4.04e-13	DOWN
4537248	MSMEG_3429	O-acyl transferase	NC_008596.1:3499988-3501115	-1.35108	2.28e-09	1.21e-08	DOWN
4531376	MSMEG_5568	clavaldehyde dehydrogenase	NC_008596.1:5655119-5655880	-1.34946	8.94e-14	7.11e-13	DOWN
4533776	panE	2-dehydropantoate 2-reductase	NC_008596.1:175555-176568	-1.34887	1.22e-10	7.4e-10	DOWN
4533170	MSMEG_5136	hypothetical protein	NC_008596.1:5237353-5237805	-1.34878	4.91e-18	5.48e-17	DOWN
4536438	MSMEG_0626	hypothetical protein	NC_008596.1:705548-706477	-1.34603	2.69e-09	1.41e-08	DOWN
4534708	MSMEG_3454	hypothetical protein	NC_008596.1:3520758-3521030	-1.34481	1.17e-16	1.14e-15	DOWN
4534811	MSMEG_3501	hypothetical protein	NC_008596.1:3565323-3565700	-1.34281	3.57e-12	2.47e-11	DOWN
4534228	galK	galactokinase	NC_008596.1:3757013-3758101	-1.3426	4.83e-13	3.61e-12	DOWN
4532017	MSMEG_4474	acyl-CoA oxidase	NC_008596.1:4556672-4558594	-1.34229	2.13e-17	2.24e-16	DOWN
4534397	MSMEG_5101	hypothetical protein	NC_008596.1:5198683-5199513	-1.34203	3.31e-15	2.94e-14	DOWN
4535243	MSMEG_1303	transcriptional regulator	NC_008596.1:1395326-1396144	-1.3419	3.47e-16	3.31e-15	DOWN
4532953	MSMEG_3846	phosphotransferase enzyme family protein	NC_008596.1:3916414-3918405	-1.34085	1.11e-08	5.42e-08	DOWN
4534384	MSMEG_2881	aldehyde dehydrogenase	NC_008596.1:2942785-2944206	-1.34002	6.75e-10	3.8e-09	DOWN
4536026	MSMEG_4615	pseudo	NC_008596.1:4699433-4700397	-1.33963	4.65e-09	2.38e-08	DOWN
4531331	MSMEG_4922	hypothetical protein	NC_008596.1:5017167-5017466	-1.33901	3.46e-15	3.06e-14	DOWN
4535491	MSMEG_4388	ABC transporter ATP-binding protein	NC_008596.1:4479425-4481053	-1.3333	1.31e-05	4.27e-05	DOWN
4537028	MSMEG_4052	hypothetical protein	NC_008596.1:4123732-4123893	-1.33296	6.06e-05	0.000178628	DOWN
4531192	MSMEG_1970	sigma factor	NC_008596.1:2050786-2052537	-1.33211	1.53e-12	1.09e-11	DOWN
4535209	MSMEG_1739	enoyl-CoA hydratase/isomerase	NC_008596.1:1833174-1833962	-1.33175	2.17e-14	1.8e-13	DOWN
4535850	MSMEG_4062	glutamyl-tRNA(Gln) amidotransferase subunit A	NC_008596.1:4133790-4135040	-1.33131	3.27e-10	1.89e-09	DOWN
4536325	MSMEG_3830	3-oxoacyl-ACP reductase	NC_008596.1:3899840-3900568	-1.33102	4e-05	0.000120911	DOWN
4534659	MSMEG_0431	hypothetical protein	NC_008596.1:506807-507502	-1.33046	1.46e-11	9.45e-11	DOWN
4534043	MSMEG_5617	immunogenic protein MPT63	NC_008596.1:5700826-5701302	-1.33028	9.63e-12	6.34e-11	DOWN
4534325	MSMEG_5750	hypothetical protein	NC_008596.1:5830307-5830420	-1.33014	0.000101268	0.000286559	DOWN
4532813	MSMEG_3348	extracellular solute-binding protein	NC_008596.1:3424110-3425210	-1.32926	6.33e-08	2.83e-07	DOWN
4531404	lon	ATP-dependent protease La	NC_008596.1:3643729-3646068	-1.32916	2.34e-17	2.44e-16	DOWN
4535959	MSMEG_0601	hypothetical protein	NC_008596.1:678620-678928	-1.3287	6.72e-11	4.16e-10	DOWN
4532032	MSMEG_5567	TetR family transcriptional regulator	NC_008596.1:5654425-5655027	-1.32783	2.07e-10	1.22e-09	DOWN
4534029	MSMEG_1068	regulatory protein	NC_008596.1:1133059-1134474	-1.32731	2.86e-13	2.2e-12	DOWN
4531154	MSMEG_5146	binding protein dependent transporter	NC_008596.1:5252482-5253402	-1.32699	1.03e-07	4.49e-07	DOWN
4530896	MSMEG_3117	cytochrome aa3 controlling protein	NC_008596.1:3191877-3192839	-1.32668	4.52e-17	4.61e-16	DOWN
4534044	MSMEG_1845	hypothetical protein	NC_008596.1:1919373-1919999	-1.32619	1.52e-09	8.23e-09	DOWN
4534770	MSMEG_1160	nitrate/sulfonate/bicarbonate ABC transporter ATPase	NC_008596.1:1223852-1224655	-1.32615	0.00326821	0.00702125	DOWN
4535482	MSMEG_3520	TetR family transcriptional regulator	NC_008596.1:3582635-3583222	-1.32552	3.12e-08	1.45e-07	DOWN
4535347	grpE	co-chaperone GrpE	NC_008596.1:798631-799281	-1.32514	2.12e-17	2.24e-16	DOWN
4531310	MSMEG_2688	antibiotic biosynthesis monooxygenase domain-containing protein	NC_008596.1:2765195-2765509	-1.32455	6.5e-13	4.78e-12	DOWN
4536708	MSMEG_2046	GlcNAc-PI de-N-acetylase	NC_008596.1:2124514-2125188	-1.32313	1.89e-15	1.71e-14	DOWN
4531290	MSMEG_6055	hypothetical protein	NC_008596.1:6122623-6122877	-1.32238	7.65e-08	3.38e-07	DOWN
4532656	MSMEG_6235	thiopurine S-methyltransferase (tpmt) superfamily protein	NC_008596.1:6299856-6300536	-1.32201	3.03e-16	2.9e-15	DOWN
4537504	MSMEG_1261	hypothetical protein	NC_008596.1:1350265-1351347	-1.32033	3.95e-13	2.97e-12	DOWN
4536138	MSMEG_3441	hypothetical protein	NC_008596.1:3510665-3511171	-1.31984	2.61e-16	2.52e-15	DOWN
4530845	MSMEG_1726	transposase	NC_008596.1:1819676-1820689	-1.31974	5.3e-07	2.1e-06	DOWN
4536977	lppH	lipoprotein lpph	NC_008596.1:4687710-4688420	-1.31965	8.74e-15	7.54e-14	DOWN
4533036	MSMEG_2465	adenine deaminase	NC_008596.1:2544747-2545967	-1.31948	1.17e-08	5.7e-08	DOWN
4531923	MSMEG_6267	thiocyanate hydrolase subunit gamma	NC_008596.1:6332056-6332766	-1.3177	7.81e-05	0.000225484	DOWN
4532808	MSMEG_4779	regulatory protein	NC_008596.1:4880896-4881501	-1.31562	4e-14	3.29e-13	DOWN
4537711	hypC	hydrogenase assembly chaperone HypC/HupF	NC_008596.1:2356566-2356826	-1.31429	2.14e-12	1.51e-11	DOWN
4532881	MSMEG_2589	hypothetical protein	NC_008596.1:2671246-2671656	-1.3136	1.11e-08	5.45e-08	DOWN
4531576	MSMEG_3273	glutamyl aminopeptidase, M42 family protein	NC_008596.1:3354888-3355973	-1.31137	6.5e-07	2.54e-06	DOWN
4531764	MSMEG_1451	arylsulfatase	NC_008596.1:1546230-1548581	-1.31006	2.24e-13	1.73e-12	DOWN
4532212	MSMEG_2499	ABC transporter	NC_008596.1:2585908-2586690	-1.30885	4.46e-11	2.81e-10	DOWN
4530894	MSMEG_2079	alcohol dehydrogenase	NC_008596.1:2156545-2157543	-1.30828	6.51e-17	6.53e-16	DOWN
4535205	MSMEG_1637	sensor signal transduction histidine kinase	NC_008596.1:1728945-1731728	-1.30822	2.41e-16	2.33e-15	DOWN
4537211	MSMEG_5916	hypothetical protein	NC_008596.1:5976314-5976595	-1.30814	0.00225355	0.00501652	DOWN
4536695	MSMEG_5350	PPE family protein	NC_008596.1:5433830-5435251	-1.30785	1.12e-07	4.87e-07	DOWN
4534406	MSMEG_0210	LprO protein	NC_008596.1:236061-237149	-1.30651	4.62e-12	3.13e-11	DOWN
4536068	MSMEG_4640	hypothetical protein	NC_008596.1:4728044-4728505	-1.306	0.000800676	0.0019339	DOWN
4537123	MSMEG_5245	universal stress protein family protein	NC_008596.1:5336810-5337652	-1.30591	4.11e-17	4.21e-16	DOWN
4533179	dhaK	dihydroxyacetone kinase subunit DhaK	NC_008596.1:2200833-2201831	-1.30449	1.51e-11	9.77e-11	DOWN
4534270	MSMEG_6019	sugar ABC transporter ATPase	NC_008596.1:6084175-6084954	-1.30442	0.000302869	0.000790409	DOWN
4536798	MSMEG_1916	hypothetical protein	NC_008596.1:1997988-1998062	-1.30296	7.98e-07	3.08e-06	DOWN
4531328	MSMEG_0883	amidohydrolase	NC_008596.1:968609-970351	-1.3016	1.13e-12	8.12e-12	DOWN
4533185	MSMEG_3274	MerR family transcriptional regulator	NC_008596.1:3356052-3356885	-1.30117	2.92e-05	9e-05	DOWN
4536954	MSMEG_2100	peptidase M20/M25/M40	NC_008596.1:2176102-2177433	-1.3009	1.98e-05	6.25e-05	DOWN
4532050	MSMEG_6284	cyclopropane-fatty-acyl-phospholipid synthase	NC_008596.1:6348114-6349427	-1.29972	9.14e-17	8.98e-16	DOWN
4535138	MSMEG_0480	GntR family transcriptional regulator	NC_008596.1:557995-558654	-1.29906	3.74e-09	1.94e-08	DOWN
4532037	MSMEG_4966	CalU12 protein	NC_008596.1:5063477-5064157	-1.29875	2.79e-13	2.14e-12	DOWN
4533323	MSMEG_4546	pseudo	NC_008596.1:4636715-4637630	-1.29841	3.08e-16	2.94e-15	DOWN
4534104	MSMEG_6576	pyridoxamine 5'-phosphate oxidase	NC_008596.1:6630646-6631086	-1.29709	1.14e-08	5.57e-08	DOWN
4535962	MSMEG_6585	acyl-CoA dehydrogenase	NC_008596.1:6638601-6639872	-1.29618	2.69e-10	1.58e-09	DOWN
4537004	MSMEG_5135	hypothetical protein	NC_008596.1:5237084-5237347	-1.29612	3.03e-16	2.9e-15	DOWN
4535044	MSMEG_0806	hydrolase	NC_008596.1:890643-892154	-1.2959	4.28e-16	4.05e-15	DOWN
4532275	MSMEG_4855	amidohydrolase	NC_008596.1:4950799-4951971	-1.29449	4.03e-05	0.00012155	DOWN
4533961	MSMEG_0349	virulence factor mce family protein	NC_008596.1:387495-388796	-1.29449	1.61e-07	6.86e-07	DOWN
4531275	MSMEG_0599	acyl-CoA synthetase	NC_008596.1:676104-677750	-1.29232	4.25e-13	3.18e-12	DOWN
4534058	MSMEG_3457	DoxD family protein/pyridine nucleotide-disulfide oxidoreductase	NC_008596.1:3522131-3523492	-1.29098	3.6e-15	3.17e-14	DOWN
4534216	MSMEG_6705	regulatory protein	NC_008596.1:6754873-6755619	-1.29054	1.31e-09	7.13e-09	DOWN
4534300	MSMEG_0348	mce-family protein mce3c	NC_008596.1:386170-387498	-1.29053	6.27e-07	2.46e-06	DOWN
4537450	MSMEG_3829	esterase	NC_008596.1:3898899-3899843	-1.29053	6.27e-07	2.46e-06	DOWN
4532339	MSMEG_3234	integral membrane protein	NC_008596.1:3317720-3318295	-1.28997	8.97e-16	8.25e-15	DOWN
4535865	MSMEG_3321	ATP/GTP-binding protein	NC_008596.1:3400223-3402250	-1.28933	3.83e-11	2.42e-10	DOWN
4531117	MSMEG_6815	hypothetical protein	NC_008596.1:6864557-6865342	-1.28867	5.06e-14	4.11e-13	DOWN
4532753	MSMEG_6863	aldolase	NC_008596.1:6911105-6911872	-1.28622	1.3e-12	9.31e-12	DOWN
4535342	MSMEG_3573	integral membrane protein	NC_008596.1:3632831-3633964	-1.28572	4.73e-10	2.71e-09	DOWN
4532199	MSMEG_4599	hypothetical protein	NC_008596.1:4688858-4689808	-1.28545	4.86e-09	2.48e-08	DOWN
4532045	MSMEG_3470	NAD-dependent epimerase/dehydratase	NC_008596.1:3536879-3537790	-1.28309	5.75e-09	2.91e-08	DOWN
4532604	MSMEG_0441	hypothetical protein	NC_008596.1:515471-516199	-1.28299	1.78e-14	1.5e-13	DOWN
4537283	MSMEG_4656	sugar ABC transporter ATP-binding protein	NC_008596.1:4743236-4744054	-1.28274	1.67e-09	9.01e-09	DOWN
4533885	MSMEG_5838	TetR family transcriptional regulator	NC_008596.1:5903822-5904367	-1.28009	2.82e-09	1.48e-08	DOWN
4537656	MSMEG_5396	KDP operon transcriptional regulatory protein KdpE	NC_008596.1:5475722-5476414	-1.27999	7.73e-05	0.000223545	DOWN
4536690	MSMEG_1185	AsnC family transcriptional regulator	NC_008596.1:1247625-1248647	-1.27941	4.9e-10	2.8e-09	DOWN
4534545	mce	methylmalonyl-CoA epimerase	NC_008596.1:5016676-5017149	-1.27897	3.59e-16	3.41e-15	DOWN
4533272	MSMEG_3703	hypothetical protein	NC_008596.1:3766881-3767561	-1.27807	3.64e-12	2.51e-11	DOWN
4536330	MSMEG_2183	hypothetical protein	NC_008596.1:2259796-2260779	-1.27806	8.94e-06	3e-05	DOWN
4536669	MSMEG_6265	transcriptional regulator	NC_008596.1:6330437-6331087	-1.27664	5.32e-12	3.57e-11	DOWN
4536594	MSMEG_3502	hypothetical protein	NC_008596.1:3565749-3565904	-1.27511	0.000359339	0.000926145	DOWN
4535957	MSMEG_2142	gp36 protein	NC_008596.1:2215051-2215749	-1.27413	4.96e-12	3.34e-11	DOWN
4534690	MSMEG_0350	virulence factor Mce family protein	NC_008596.1:388793-389932	-1.27403	1.03e-06	3.92e-06	DOWN
4531716	MSMEG_5748	hypothetical protein	NC_008596.1:5829490-5830131	-1.2725	1.47e-08	7.1e-08	DOWN
4537350	MSMEG_6476	hypothetical protein	NC_008596.1:6539586-6539978	-1.27079	4.25e-09	2.19e-08	DOWN
4531360	MSMEG_1707	phosphatase YfbT	NC_008596.1:1801804-1802463	-1.27024	8.51e-10	4.76e-09	DOWN
4532643	MSMEG_0443	carbon-nitrogen hydrolase	NC_008596.1:516901-517893	-1.26803	6.29e-07	2.47e-06	DOWN
4533635	MSMEG_6686	glutaryl-CoA dehydrogenase	NC_008596.1:6736619-6737812	-1.26744	3.94e-10	2.27e-09	DOWN
4531076	MSMEG_4657	ABC transporter	NC_008596.1:4744059-4745117	-1.26689	2.93e-10	1.71e-09	DOWN
4530880	MSMEG_0652	hypothetical protein	NC_008596.1:733710-734573	-1.26651	6e-10	3.41e-09	DOWN
4532722	MSMEG_0439	hypothetical protein	NC_008596.1:514184-515320	-1.2663	1.12e-08	5.46e-08	DOWN
4533254	MSMEG_0343	TetR family transcriptional regulator	NC_008596.1:381177-381809	-1.26511	8.59e-09	4.26e-08	DOWN
4533942	MSMEG_3115	regulatory protein, DeoR	NC_008596.1:3191000-3191818	-1.26482	4.12e-12	2.81e-11	DOWN
4535293	MSMEG_4058	major facilitator superfamily protein	NC_008596.1:4129996-4131315	-1.26434	3.19e-07	1.31e-06	DOWN
4532509	MSMEG_0382	transporter	NC_008596.1:428652-431636	-1.26243	1.61e-15	1.46e-14	DOWN
4531987	eutC	ethanolamine ammonia-lyase small subunit	NC_008596.1:1644318-1645094	-1.26207	2.31e-09	1.22e-08	DOWN
4537420	hypE	hydrogenase expression/formation protein HypE	NC_008596.1:2777828-2778901	-1.26207	0.000232821	0.000620514	DOWN
4531364	aceE	pyruvate dehydrogenase subunit E1	NC_008596.1:4407679-4410468	-1.26079	5.67e-16	5.3e-15	DOWN
4534181	MSMEG_3718	hypothetical protein	NC_008596.1:3787202-3787639	-1.25931	1.14e-09	6.29e-09	DOWN
4537020	MSMEG_5395	sensor protein KdpD	NC_008596.1:5473206-5475725	-1.25909	3.05e-10	1.78e-09	DOWN
4534652	MSMEG_6150	4-carboxymuconolactone decarboxylase	NC_008596.1:6219676-6220032	-1.25719	1.69e-07	7.17e-07	DOWN
4530971	MSMEG_0773	acetyltransferase	NC_008596.1:857779-858309	-1.25669	9.37e-11	5.73e-10	DOWN
4537009	MSMEG_3014	hypothetical protein	NC_008596.1:3083458-3083838	-1.25649	3e-10	1.75e-09	DOWN
4531452	MSMEG_3660	hypothetical protein	NC_008596.1:3726341-3726784	-1.25565	4.76e-11	2.99e-10	DOWN
4531485	MSMEG_2511	siderophore utilization protein	NC_008596.1:2596370-2597242	-1.25553	1.03e-14	8.82e-14	DOWN
4537556	MSMEG_4664	IolD protein	NC_008596.1:4750019-4751968	-1.25414	1.04e-10	6.31e-10	DOWN
4537480	MSMEG_0888	hypothetical protein	NC_008596.1:973419-973982	-1.25413	3.44e-08	1.59e-07	DOWN
4534236	MSMEG_5285	phospholipase	NC_008596.1:5376770-5377642	-1.25407	6.79e-14	5.44e-13	DOWN
4537287	MSMEG_5134	hypothetical protein	NC_008596.1:5236831-5236998	-1.25391	3.7e-13	2.8e-12	DOWN
4535316	MSMEG_3339	hypothetical protein	NC_008596.1:3416136-3416414	-1.25266	0.0040031	0.00847137	DOWN
4536908	MSMEG_0543	hypothetical protein	NC_008596.1:621750-622790	-1.25191	4.24e-08	1.94e-07	DOWN
4533122	MSMEG_4401	phosphonoacetaldehyde hydrolase	NC_008596.1:4491063-4491788	-1.25177	3.12e-14	2.58e-13	DOWN
4535343	MSMEG_5945	hypothetical protein	NC_008596.1:6007005-6007583	-1.24559	3.17e-05	9.72e-05	DOWN
4531592	MSMEG_4344	monooxygenase	NC_008596.1:4430791-4432173	-1.24524	4.83e-09	2.47e-08	DOWN
4533318	MSMEG_3964	pyruvate dehydrogenase	NC_008596.1:4033163-4034893	-1.24388	0.000681448	0.0016659	DOWN
4531436	MSMEG_3443	hypothetical protein	NC_008596.1:3512255-3512413	-1.24176	0.000175121	0.000478433	DOWN
4533552	MSMEG_3350	TRAP transporter DctM-like membrane protein	NC_008596.1:3425722-3427083	-1.24175	1.06e-06	4.05e-06	DOWN
4535582	MSMEG_5354	O-methyltransferase, family protein 2	NC_008596.1:5436911-5437936	-1.23898	9.54e-11	5.83e-10	DOWN
4536652	MSMEG_2038	monooxygenase, flavin-binding family protein	NC_008596.1:2116080-2117639	-1.23841	5.54e-15	4.83e-14	DOWN
4535884	MSMEG_2620	hypothetical protein	NC_008596.1:2701968-2702672	-1.23812	6.07e-12	4.04e-11	DOWN
4531938	MSMEG_0729	hypothetical protein	NC_008596.1:814904-815572	-1.23744	7.65e-10	4.3e-09	DOWN
4535741	MSMEG_6212	hemerythrin HHE cation binding domain-containing protein	NC_008596.1:6276681-6277265	-1.23636	4.15e-09	2.14e-08	DOWN
4532219	MSMEG_3566	FadD16 protein	NC_008596.1:3626921-3627553	-1.23559	1.83e-09	9.84e-09	DOWN
4532708	MSMEG_4854	peptidase, M24 family protein	NC_008596.1:4949525-4950802	-1.23559	0.000612032	0.00151121	DOWN
4532930	MSMEG_0530	short chain dehydrogenase	NC_008596.1:611055-611756	-1.2346	4.69e-14	3.82e-13	DOWN
4535560	MSMEG_0445	amidohydrolase	NC_008596.1:518920-520557	-1.23393	4.75e-11	2.98e-10	DOWN
4532929	MSMEG_2021	lipopolysaccharide biosynthesis acyltransferase, M	NC_008596.1:2098884-2100914	-1.23298	2.6e-10	1.53e-09	DOWN
4535111	MSMEG_4082	monoxygenase	NC_008596.1:4157064-4158410	-1.23146	5.5e-12	3.69e-11	DOWN
4532040	dnaK	molecular chaperone DnaK	NC_008596.1:796766-798634	-1.23089	2.36e-15	2.12e-14	DOWN
4530826	crcB	camphor resistance protein CrcB	NC_008596.1:2209355-2209720	-1.22782	1.07e-05	3.55e-05	DOWN
4536194	snm	secretion protein Snm4	NC_008596.1:702737-704164	-1.22753	9.47e-11	5.79e-10	DOWN
4533226	MSMEG_0634	PAP2 superfamily protein	NC_008596.1:714093-714764	-1.2268	3.09e-07	1.27e-06	DOWN
4535692	MSMEG_5244	DevR family transcriptional regulator	NC_008596.1:5336164-5336799	-1.22484	3.93e-15	3.46e-14	DOWN
4534489	MSMEG_6538	3-oxoacyl-ACP reductase	NC_008596.1:6595503-6596210	-1.22229	3.38e-08	1.57e-07	DOWN
4532627	hslR	heat shock protein 15	NC_008596.1:3521165-3521548	-1.22062	1.56e-12	1.11e-11	DOWN
4536616	MSMEG_2024	hydroxymethylglutaryl-CoA lyase	NC_008596.1:2103822-2104766	-1.22051	5e-05	0.000149184	DOWN
4531829	MSMEG_1127	transmembrane protein	NC_008596.1:1188880-1189476	-1.21815	3.51e-07	1.43e-06	DOWN
4534992	MSMEG_4739	hypothetical protein	NC_008596.1:4839149-4839829	-1.21557	4.19e-13	3.14e-12	DOWN
4533738	MSMEG_1265	hypothetical protein	NC_008596.1:1354095-1355633	-1.2133	4.18e-13	3.13e-12	DOWN
4536295	MSMEG_1782	oxidoreductase, short chain dehydrogenase/reductase	NC_008596.1:1867419-1868306	-1.21108	8.43e-07	3.25e-06	DOWN
4535196	MSMEG_5913	dioxygenase	NC_008596.1:5972603-5973724	-1.21062	8.15e-11	5.02e-10	DOWN
4532715	MSMEG_2130	acyl-CoA dehydrogenase	NC_008596.1:2205201-2206385	-1.21003	1.29e-11	8.39e-11	DOWN
4533200	MSMEG_5058	ABC transporter ATP-binding protein	NC_008596.1:5158887-5160107	-1.20934	5.97e-14	4.82e-13	DOWN
4535087	MSMEG_3499	hypothetical protein	NC_008596.1:3563799-3564401	-1.20906	5.91e-11	3.67e-10	DOWN
4537372	MSMEG_6356	AraC family transcriptional regulator	NC_008596.1:6414574-6415206	-1.20778	1.32e-10	7.98e-10	DOWN
4532272	MSMEG_0871	aldehyde or xanthine dehydrogenase, molybdopterin binding subunit protein	NC_008596.1:958483-959457	-1.20451	0.000153289	0.000422086	DOWN
4533789	MSMEG_3299	pseudo	NC_008596.1:3378146-3379142	-1.20335	4.71e-07	1.88e-06	DOWN
4537285	MSMEG_0856	LuxR family transcriptional regulator	NC_008596.1:938204-938851	-1.19775	4.11e-06	1.46e-05	DOWN
4531800	MSMEG_5147	sugar ABC transporter transmembrane protein	NC_008596.1:5253404-5254303	-1.19752	2.42e-06	8.84e-06	DOWN
4531623	MSMEG_5059	ABC transporter permease	NC_008596.1:5160112-5160948	-1.1971	1.17e-12	8.43e-12	DOWN
4535721	MSMEG_6584	acyl-CoA dehydrogenase	NC_008596.1:6637418-6638608	-1.19703	2.79e-09	1.47e-08	DOWN
4537403	MSMEG_5308	hypothetical protein	NC_008596.1:5398656-5399762	-1.19702	1.7e-14	1.43e-13	DOWN
4535064	MSMEG_4115	3-hydroxybutyryl-CoA dehydrogenase	NC_008596.1:4195303-4196184	-1.19649	3.07e-10	1.79e-09	DOWN
4532233	MSMEG_5400	dehydrogenase	NC_008596.1:5479546-5481138	-1.19643	3.12e-08	1.45e-07	DOWN
4534468	msrA	methionine sulfoxide reductase A	NC_008596.1:6540054-6540569	-1.19628	4.11e-14	3.37e-13	DOWN
4532404	MSMEG_5592	hypothetical protein	NC_008596.1:5679244-5680065	-1.19593	1.66e-09	9e-09	DOWN
4530812	MSMEG_3601	ribose/xylose/arabinose/galactoside ABC-type transport systems, permeases	NC_008596.1:3664319-3665353	-1.19587	1.26e-09	6.9e-09	DOWN
4532812	MSMEG_0997	hypothetical protein	NC_008596.1:1067651-1068280	-1.19497	0.000212157	0.000569781	DOWN
4534084	MSMEG_3444	choline dehydrogenase	NC_008596.1:3512435-3513934	-1.19496	1.55e-08	7.46e-08	DOWN
4536051	MSMEG_3659	TetR family transcriptional regulator	NC_008596.1:3725537-3726226	-1.19496	1.22e-05	4e-05	DOWN
4537587	MSMEG_5961	glycosyl transferase family protein	NC_008596.1:6022498-6023439	-1.19195	4.48e-08	2.05e-07	DOWN
4535597	MSMEG_1425	creatininase subfamily protein	NC_008596.1:1525942-1526610	-1.18987	1.28e-12	9.18e-12	DOWN
4532379	MSMEG_6317	lipolytic protein G-D-S-L	NC_008596.1:6382820-6383470	-1.18987	4.05e-13	3.04e-12	DOWN
4532801	MSMEG_6238	two-component system sensor kinase	NC_008596.1:6302267-6303418	-1.18922	3.09e-07	1.27e-06	DOWN
4535504	MSMEG_2913	hydrolase	NC_008596.1:2977263-2978126	-1.18795	2.01e-07	8.46e-07	DOWN
4532278	MSMEG_6801	kinase, pfkB family protein	NC_008596.1:6848197-6849126	-1.18759	1.94e-06	7.19e-06	DOWN
4536856	MSMEG_5867	steroid delta-isomerase	NC_008596.1:5932661-5933098	-1.18759	1.94e-06	7.19e-06	DOWN
4535907	pntB	NAD(P) transhydrogenase subunit beta	NC_008596.1:4186644-4188083	-1.18744	1.26e-08	6.11e-08	DOWN
4530831	MSMEG_3469	TetR family transcriptional regulator	NC_008596.1:3536190-3536777	-1.1873	1.52e-08	7.36e-08	DOWN
4537485	MSMEG_5022	flavin-containing monooxygenase FMO	NC_008596.1:5118895-5120736	-1.18588	1.53e-06	5.73e-06	DOWN
4531471	MSMEG_5980	methyltransferase	NC_008596.1:6043705-6044961	-1.1849	0.000294605	0.000770354	DOWN
4533460	selA	selenocysteine synthase	NC_008596.1:1927124-1928404	-1.1847	4.72e-12	3.19e-11	DOWN
4534158	MSMEG_1866	transposase B	NC_008596.1:1942190-1943023	-1.18405	3.07e-05	9.41e-05	DOWN
4535657	MSMEG_4708	methyltransferase	NC_008596.1:4798800-4799402	-1.18355	1.08e-07	4.71e-07	DOWN
4533723	MSMEG_1497	acyl-CoA dehydrogenase	NC_008596.1:1588538-1589725	-1.18325	2.11e-08	1e-07	DOWN
4532306	MSMEG_1875	sensor histidine kinase MtrB	NC_008596.1:1951266-1952852	-1.18256	3.98e-14	3.28e-13	DOWN
4535617	MSMEG_2067	methyltransferase type 12	NC_008596.1:2144836-2145471	-1.18248	2.46e-06	8.97e-06	DOWN
4535911	MSMEG_6695	cytochrome P450	NC_008596.1:6745730-6746932	-1.18203	0.000827443	0.00199637	DOWN
4533389	MSMEG_6771	hypothetical protein	NC_008596.1:6820316-6820858	-1.18116	0.000160593	0.000441464	DOWN
4532538	MSMEG_3380	pyridoxamine 5'-phosphate oxidase-like FMN-binding protein	NC_008596.1:3452237-3452626	-1.18112	5.4e-11	3.37e-10	DOWN
4531503	MSMEG_4833	acyl-CoA dehydrogenase	NC_008596.1:4929479-4930627	-1.18094	1.6e-10	9.56e-10	DOWN
4536245	MSMEG_1551	hypothetical protein	NC_008596.1:1641323-1641517	-1.17956	1.25e-08	6.11e-08	DOWN
4533093	MSMEG_5015	hypothetical protein	NC_008596.1:5112759-5113583	-1.17642	6.23e-14	5.02e-13	DOWN
4532474	MSMEG_2920	aldo/keto reductase	NC_008596.1:2983601-2984632	-1.17636	5.18e-08	2.34e-07	DOWN
4536381	MSMEG_3320	pseudo	NC_008596.1:3399213-3400114	-1.17582	8.15e-13	5.95e-12	DOWN
4532492	MSMEG_3916	hypothetical protein	NC_008596.1:3984847-3985164	-1.17505	7.72e-06	2.61e-05	DOWN
4531469	MSMEG_5914	acyl-CoA synthetase	NC_008596.1:5973735-5975390	-1.1731	1.68e-10	1e-09	DOWN
4536760	MSMEG_4365	hypothetical protein	NC_008596.1:4450873-4453014	-1.1725	1.16e-10	7.02e-10	DOWN
4537710	cysD	sulfate adenylyltransferase subunit 2	NC_008596.1:5074346-5075281	-1.17203	9.37e-12	6.19e-11	DOWN
4532663	MSMEG_1783	hypothetical protein	NC_008596.1:1868321-1868551	-1.1705	0.0163846	0.0303752	DOWN
4533895	MSMEG_6293	transcriptional regulatory protein	NC_008596.1:6358686-6359258	-1.17015	5.58e-11	3.48e-10	DOWN
4530859	MSMEG_3503	hypothetical protein	NC_008596.1:3566211-3566756	-1.16851	2.22e-11	1.42e-10	DOWN
4532152	MSMEG_6503	TetR family transcriptional regulator	NC_008596.1:6565649-6566215	-1.16835	2.49e-06	9.08e-06	DOWN
4532534	mmsB	3-hydroxyisobutyrate dehydrogenase	NC_008596.1:1587649-1588521	-1.16821	4.45e-09	2.29e-08	DOWN
4532002	MSMEG_3353	hypothetical protein	NC_008596.1:3428505-3428870	-1.1661	9.35e-07	3.59e-06	DOWN
4532470	MSMEG_4810	hypothetical protein	NC_008596.1:4909265-4910176	-1.16521	1.27e-06	4.81e-06	DOWN
4535221	MSMEG_6547	amidohydrolase	NC_008596.1:6603696-6604958	-1.16521	6.62e-07	2.58e-06	DOWN
4534555	MSMEG_5020	acetoin(diacetyl) reductase	NC_008596.1:5116927-5117706	-1.1629	0.000573643	0.00142383	DOWN
4537331	MSMEG_2023	CAIB/BAIF family protein	NC_008596.1:2102587-2103825	-1.16267	1.28e-05	4.19e-05	DOWN
4531626	MSMEG_1156	dihydrodipicolinate synthetase	NC_008596.1:1219519-1220406	-1.1624	0.00106568	0.00252445	DOWN
4535286	MSMEG_2117	beta-glucoside-specific EII permease	NC_008596.1:2192581-2193051	-1.16217	1.92e-10	1.14e-09	DOWN
4532266	MSMEG_2917	hypothetical protein	NC_008596.1:2980507-2981214	-1.16216	1.88e-08	8.98e-08	DOWN
4537441	MSMEG_0117	hydrolase	NC_008596.1:140284-141147	-1.16216	2.83e-06	1.02e-05	DOWN
4531219	MSMEG_0267	esterase	NC_008596.1:301478-302494	-1.16041	2.97e-08	1.39e-07	DOWN
4535015	MSMEG_6244	TetR family transcriptional regulator	NC_008596.1:6309530-6310090	-1.16018	7.34e-05	0.000213134	DOWN
4535647	MSMEG_0987	hypothetical protein	NC_008596.1:1059955-1060326	-1.15877	1.54e-13	1.2e-12	DOWN
4531530	MSMEG_0520	porin	NC_008596.1:600086-600733	-1.15866	1.78e-05	5.68e-05	DOWN
4536940	MSMEG_4178	flavodoxin/nitric oxide synthase	NC_008596.1:4255057-4255647	-1.1576	2.06e-06	7.6e-06	DOWN
4534751	MSMEG_0152	alanine dehydrogenase	NC_008596.1:174258-175340	-1.15477	0.000107546	0.00030342	DOWN
4531934	MSMEG_4394	LysR family transcriptional regulator	NC_008596.1:4486041-4486934	-1.15361	2.52e-10	1.48e-09	DOWN
4534931	dnaJ	molecular chaperone DnaJ	NC_008596.1:799323-800495	-1.15282	1.64e-13	1.28e-12	DOWN
4536449	MSMEG_1243	hypothetical protein	NC_008596.1:1315709-1316782	-1.15124	2.96e-13	2.26e-12	DOWN
4531836	MSMEG_3415	MarR family transcriptional regulator	NC_008596.1:3487270-3487755	-1.15121	7.25e-07	2.82e-06	DOWN
4535493	MSMEG_3376	beta-lactamase	NC_008596.1:3447605-3448519	-1.1512	8.18e-12	5.41e-11	DOWN
4532867	MSMEG_5930	hypothetical protein	NC_008596.1:5989939-5991066	-1.15048	7.2e-06	2.46e-05	DOWN
4533617	MSMEG_0442	tetracycline repressor domain-containing protein	NC_008596.1:516209-516811	-1.15012	0.000422836	0.00107851	DOWN
4532689	MSMEG_5402	dehydrogenase DhgA	NC_008596.1:5481632-5482420	-1.14976	4.22e-06	1.49e-05	DOWN
4533983	MSMEG_5168	hypothetical protein	NC_008596.1:5269784-5271097	-1.14922	5.81e-11	3.61e-10	DOWN
4534838	MSMEG_3500	hypothetical protein	NC_008596.1:3564453-3565199	-1.1489	4.51e-12	3.07e-11	DOWN
4532960	MSMEG_6703	N5,N10- methylenetetrahydromethanopterin reductase-related protein	NC_008596.1:6753954-6754784	-1.14786	2.1e-10	1.24e-09	DOWN
4533669	MSMEG_5057	hypothetical protein	NC_008596.1:5158285-5158890	-1.14583	1.72e-08	8.23e-08	DOWN
4532428	MSMEG_1069	amino acid permease	NC_008596.1:1134639-1136105	-1.14541	8.34e-05	0.000239189	DOWN
4534413	fxsA	FxsA protein	NC_008596.1:3933944-3934450	-1.1452	6.56e-13	4.82e-12	DOWN
4533351	MSMEG_4179	integral membrane protein	NC_008596.1:4256984-4257466	-1.14285	1.31e-10	7.88e-10	DOWN
4532208	MSMEG_2432	D-alanyl-D-alanine carboxypeptidase	NC_008596.1:2517308-2518135	-1.14249	6.47e-09	3.26e-08	DOWN
4533161	MSMEG_5013	hypothetical protein	NC_008596.1:5109663-5110502	-1.14149	5.55e-12	3.71e-11	DOWN
4534965	MSMEG_6577	methylmalonyl-CoA carboxyltransferase 12S subunit	NC_008596.1:6631138-6632682	-1.13918	2.92e-10	1.7e-09	DOWN
4533061	MSMEG_5233	RmlD substrate binding domain-containing protein	NC_008596.1:5324552-5325631	-1.13815	1.36e-07	5.85e-07	DOWN
4532679	MSMEG_5246	hypothetical protein	NC_008596.1:5337654-5338643	-1.13785	2.93e-13	2.25e-12	DOWN
4532936	MSMEG_2281	pseudo	NC_008596.1:2364966-2365514	-1.13762	0.00122227	0.00286171	DOWN
4537651	MSMEG_2483	IclR family transcriptional regulator	NC_008596.1:2565362-2566084	-1.13608	2.2e-06	8.12e-06	DOWN
4532170	MSMEG_6135	hypothetical protein	NC_008596.1:6198302-6198706	-1.13536	1.72e-09	9.26e-09	DOWN
4533178	MSMEG_1854	valosin containing protein-1	NC_008596.1:1931586-1932791	-1.13532	1.69e-10	1.01e-09	DOWN
4533285	menA	1,4-dihydroxy-2-naphthoate octaprenyltransferase	NC_008596.1:1060331-1061200	-1.13518	6.07e-13	4.49e-12	DOWN
4535326	MSMEG_0624	subtilase	NC_008596.1:704172-705551	-1.13087	2.55e-08	1.21e-07	DOWN
4532573	MSMEG_4111	alpha-methylacyl-CoA racemase	NC_008596.1:4190676-4191806	-1.13042	9.27e-08	4.07e-07	DOWN
4535989	nthA	nitrile hydratase subunit alpha	NC_008596.1:423733-424353	-1.13011	0.00471512	0.00978807	DOWN
4531610	MSMEG_3269	sugar ABC transporter ATP-binding protein	NC_008596.1:3350397-3351506	-1.1297	5.46e-07	2.16e-06	DOWN
4536619	MSMEG_4003	hypothetical protein	NC_008596.1:4077270-4078223	-1.12715	8.03e-06	2.71e-05	DOWN
4533454	MSMEG_0150	NAD(P) transhydrogenase subunit beta	NC_008596.1:172501-173934	-1.12707	1.18e-06	4.48e-06	DOWN
4532209	nuoF	NADH-quinone oxidoreductase subunit F	NC_008596.1:2138102-2139433	-1.12687	0.00197362	0.00443796	DOWN
4533833	MSMEG_5747	hypothetical protein	NC_008596.1:5828870-5829433	-1.12526	2.22e-06	8.15e-06	DOWN
4532419	MSMEG_2546	GntR family transcriptional regulator	NC_008596.1:2630288-2630989	-1.12503	1.25e-11	8.18e-11	DOWN
4532908	MSMEG_3657	hypothetical protein	NC_008596.1:3723502-3725001	-1.12424	2.82e-10	1.65e-09	DOWN
4530958	MSMEG_4834	L-carnitine dehydratase/bile acid-inducible protein F	NC_008596.1:4930620-4931879	-1.12184	1.21e-09	6.65e-09	DOWN
4536468	MSMEG_2022	GntT protein	NC_008596.1:2101118-2102572	-1.12143	1.37e-06	5.16e-06	DOWN
4531669	MSMEG_2278	membrane-bound oxidoreductase	NC_008596.1:2360646-2362238	-1.12126	7.37e-08	3.28e-07	DOWN
4535594	MSMEG_5970	glutamate-1-semialdehyde 2,1-aminomutase	NC_008596.1:6035857-6037233	-1.11984	1.81e-06	6.74e-06	DOWN
4536548	MSMEG_1076	hypothetical protein	NC_008596.1:1141429-1141704	-1.11941	3.79e-10	2.19e-09	DOWN
4536572	MSMEG_0877	dihydrodipicolinate synthase	NC_008596.1:962791-963723	-1.11916	1.13e-10	6.86e-10	DOWN
4533169	MSMEG_4715	acyl-CoA dehydrogenase	NC_008596.1:4805090-4806253	-1.11852	6.27e-09	3.16e-08	DOWN
4531346	MSMEG_2820	hypothetical protein	NC_008596.1:2882879-2884048	-1.11801	6.03e-12	4.02e-11	DOWN
4536998	MSMEG_0534	permease, major facilitator family protein	NC_008596.1:614551-615804	-1.11765	1.39e-09	7.55e-09	DOWN
4536590	nuoD	NADH dehydrogenase subunit D	NC_008596.1:2140228-2141556	-1.11698	0.0161128	0.0299501	DOWN
4534448	MSMEG_3416	hypothetical protein	NC_008596.1:3487878-3488744	-1.11696	5.53e-06	1.92e-05	DOWN
4533471	MSMEG_1545	hypothetical protein	NC_008596.1:1635427-1636125	-1.11696	4.73e-07	1.89e-06	DOWN
4532913	MSMEG_5335	formamidase	NC_008596.1:5421419-5422666	-1.11608	8.18e-13	5.97e-12	DOWN
4535599	MSMEG_4709	enoyl-CoA hydratase	NC_008596.1:4799413-4800162	-1.116	1.25e-10	7.54e-10	DOWN
4536259	fdhD	formate dehydrogenase accessory protein	NC_008596.1:189944-190786	-1.11405	3.47e-09	1.81e-08	DOWN
4534611	MSMEG_1503	antibiotic ABC transporter transmembrane protein	NC_008596.1:1595399-1596112	-1.11322	1.21e-05	3.98e-05	DOWN
4535387	MSMEG_3430	SAM-dependent methyltransferase	NC_008596.1:3501227-3501832	-1.11096	1.37e-10	8.28e-10	DOWN
4535671	MSMEG_6032	TetR family transcriptional regulator	NC_008596.1:6098766-6099374	-1.11078	1.26e-09	6.86e-09	DOWN
4534148	MSMEG_2032	hypothetical protein	NC_008596.1:2109768-2110526	-1.11033	1.96e-11	1.26e-10	DOWN
4536505	MSMEG_6680	integral membrane protein	NC_008596.1:6732021-6732491	-1.11006	0.0139278	0.0262639	DOWN
4534109	MSMEG_6253	fur family protein transcriptional regulator	NC_008596.1:6318227-6318691	-1.10962	2.17e-12	1.53e-11	DOWN
4532793	MSMEG_5915	enoyl-CoA hydratase	NC_008596.1:5975459-5976259	-1.10907	6.77e-07	2.64e-06	DOWN
4534470	MSMEG_0381	Mmp14a protein	NC_008596.1:425760-428642	-1.10812	2.19e-12	1.55e-11	DOWN
4532528	mdcH	malonate decarboxylase subunit epsilon	NC_008596.1:6681119-6682018	-1.10677	2.02e-07	8.48e-07	DOWN
4533888	ligC	ATP-dependent DNA ligase	NC_008596.1:6368286-6369332	-1.10624	7.85e-10	4.4e-09	DOWN
4532846	MSMEG_0305	acyltransferase domain-containing protein	NC_008596.1:337102-337911	-1.10602	2.75e-09	1.45e-08	DOWN
4536791	MSMEG_1738	transmembrane protein	NC_008596.1:1831699-1832286	-1.10499	1.9e-12	1.34e-11	DOWN
4530856	MSMEG_3607	short chain dehydrogenase	NC_008596.1:3670935-3671717	-1.10483	6.62e-09	3.32e-08	DOWN
4533370	MSMEG_1722	hypothetical protein	NC_008596.1:1817135-1817806	-1.10454	3.29e-08	1.53e-07	DOWN
4536604	MSMEG_0968	cytochrome P450	NC_008596.1:1040556-1042010	-1.10276	1.03e-05	3.44e-05	DOWN
4535609	MSMEG_6451	ArsR family transcriptional regulator	NC_008596.1:6514667-6515059	-1.10262	0.000228561	0.000610383	DOWN
4531795	MSMEG_1812	hypothetical protein	NC_008596.1:1888189-1888473	-1.10256	7.93e-11	4.89e-10	DOWN
4534217	gabD2	succinate-semialdehyde dehydrogenase	NC_008596.1:5971046-5972599	-1.10101	1.57e-11	1.02e-10	DOWN
4535158	MSMEG_0170	transmembrane transporter	NC_008596.1:195185-196567	-1.10016	4.69e-07	1.87e-06	DOWN
4537590	MSMEG_3559	short chain dehydrogenase	NC_008596.1:3620574-3621500	-1.09932	0.000331696	0.000860571	DOWN
4533796	MSMEG_2697	hypothetical protein	NC_008596.1:2772377-2772784	-1.09912	2.26e-11	1.44e-10	DOWN
4535984	MSMEG_4047	dihydropteroate synthase	NC_008596.1:4119176-4120141	-1.09909	0.000101416	0.000286855	DOWN
4532798	MSMEG_3391	L-carnitine dehydratase/bile acid-inducible protein F	NC_008596.1:3462268-3463464	-1.09857	1.28e-06	4.82e-06	DOWN
4531556	MSMEG_0586	STAS domain-containing protein	NC_008596.1:662508-662897	-1.09855	2.37e-12	1.66e-11	DOWN
4532343	MSMEG_2132	acyl carrier protein	NC_008596.1:2207959-2208228	-1.09777	1.2e-07	5.21e-07	DOWN
4532499	MSMEG_6554	ABC transporter ATP-binding protein	NC_008596.1:6608882-6611464	-1.09752	1.01e-09	5.58e-09	DOWN
4535129	MSMEG_2756	hypothetical protein	NC_008596.1:2825183-2825374	-1.09696	2.76e-12	1.92e-11	DOWN
4535302	MSMEG_6474	nucleoside-diphosphate-sugar epimerase	NC_008596.1:6538024-6539046	-1.0963	7.86e-07	3.04e-06	DOWN
4533186	MSMEG_6665	integral membrane protein	NC_008596.1:6719637-6719912	-1.09595	7.25e-08	3.23e-07	DOWN
4537470	MSMEG_1209	glycosidase	NC_008596.1:1278387-1279841	-1.09595	1.59e-08	7.68e-08	DOWN
4535120	arsC	arsenate reductase	NC_008596.1:5512096-5512443	-1.09591	1.26e-10	7.58e-10	DOWN
4534417	glnA	glutamine synthetase	NC_008596.1:3621908-3623269	-1.09529	6.54e-10	3.69e-09	DOWN
4531243	MSMEG_2502	transporter ATPase	NC_008596.1:2587550-2588344	-1.09496	7.22e-06	2.46e-05	DOWN
4531666	MSMEG_5995	P450 heme-thiolate protein	NC_008596.1:6061103-6062386	-1.09456	2.55e-08	1.2e-07	DOWN
4536836	MSMEG_5878	serine esterase, cutinase	NC_008596.1:5939853-5940551	-1.09456	1.77e-08	8.49e-08	DOWN
4534348	MSMEG_4067	zinc-containing alcohol dehydrogenase superfamily protein	NC_008596.1:4141631-4142620	-1.09399	6.2e-08	2.78e-07	DOWN
4531841	MSMEG_5966	oxidoreductase, short chain dehydrogenase/reductase	NC_008596.1:6029863-6030627	-1.09266	6.56e-07	2.56e-06	DOWN
4535591	MSMEG_1458	tena/thi-4 family protein	NC_008596.1:1555365-1556084	-1.09122	0.0015826	0.0036337	DOWN
4537672	MSMEG_1592	hypothetical protein	NC_008596.1:1680305-1681108	-1.08728	1.02e-08	5e-08	DOWN
4536277	MSMEG_5176	methyltransferase type 11	NC_008596.1:5275385-5276035	-1.08717	2.37e-08	1.12e-07	DOWN
4536452	MSMEG_3694	feruloyl-CoA synthetase	NC_008596.1:3759496-3760995	-1.08532	1.52e-10	9.11e-10	DOWN
4536265	MSMEG_1107	isonitrile hydratase	NC_008596.1:1170870-1171601	-1.08505	4.58e-05	0.000137358	DOWN
4536172	MSMEG_4393	carboxyvinyl-carboxyphosphonate phosphorylmutase	NC_008596.1:4485158-4486039	-1.08504	3.18e-06	1.14e-05	DOWN
4536913	MSMEG_4352	hypothetical protein	NC_008596.1:4439737-4440798	-1.08455	1.85e-10	1.1e-09	DOWN
4530843	MSMEG_6666	hypothetical protein	NC_008596.1:6719967-6720425	-1.08267	8.17e-07	3.15e-06	DOWN
4535108	MSMEG_0787	extracellular solute-binding protein	NC_008596.1:874298-875266	-1.08244	7.49e-11	4.62e-10	DOWN
4536085	MSMEG_3902	ATPase AAA	NC_008596.1:3974235-3976076	-1.08228	4.4e-12	3e-11	DOWN
4534799	MSMEG_0981	two-component system regulator	NC_008596.1:1053329-1053688	-1.08221	0.0211271	0.0381297	DOWN
4536896	MSMEG_6614	integral membrane protein	NC_008596.1:6666377-6667543	-1.08104	1.81e-09	9.73e-09	DOWN
4535442	MSMEG_5866	alcohol dehydrogenase	NC_008596.1:5931523-5932650	-1.08068	2.67e-08	1.25e-07	DOWN
4535824	MSMEG_1718	pseudo	NC_008596.1:1813034-1813573	-1.08038	0.000179276	0.000488381	DOWN
4535378	speB	agmatinase	NC_008596.1:1137579-1138550	-1.07949	0.00784892	0.0156063	DOWN
4531026	MSMEG_0280	alpha/beta hydrolase	NC_008596.1:312359-313258	-1.07902	3.7e-06	1.32e-05	DOWN
4532560	MSMEG_2880	enoyl-CoA hydratase	NC_008596.1:2941974-2942756	-1.07877	6.38e-05	0.000186955	DOWN
4537690	MSMEG_1853	pseudo	NC_008596.1:1929588-1931401	-1.07754	8.67e-08	3.82e-07	DOWN
4532835	MSMEG_4515	non-ribosomal peptide synthetase	NC_008596.1:4600229-4603738	-1.07715	1.95e-10	1.16e-09	DOWN
4532061	MSMEG_2070	acyl-CoA dehydrogenase	NC_008596.1:2146818-2148062	-1.07624	3.33e-08	1.54e-07	DOWN
4537099	MSMEG_6322	bifunctional wax ester synthase/acyl-CoA diacylglycerol acyltransferase	NC_008596.1:6389612-6390985	-1.07566	5.04e-06	1.76e-05	DOWN
4536802	MSMEG_3919	hypothetical protein	NC_008596.1:3987401-3988021	-1.07565	4.28e-07	1.71e-06	DOWN
4535564	MSMEG_0855	hypothetical protein	NC_008596.1:938818-939270	-1.07385	0.000286728	0.000751531	DOWN
4532011	pgm	phosphoglucomutase	NC_008596.1:2210186-2211820	-1.07372	8.68e-11	5.33e-10	DOWN
4533032	MSMEG_3504	hypothetical protein	NC_008596.1:3566848-3567099	-1.07209	8.94e-05	0.000254732	DOWN
4533555	ampC	beta-lactamase	NC_008596.1:4046936-4048078	-1.07087	3.82e-09	1.98e-08	DOWN
4537371	deoC	deoxyribose-phosphate aldolase	NC_008596.1:3161830-3162525	-1.06985	0.00115818	0.00272509	DOWN
4537240	MSMEG_3198	NUDIX family hydrolase	NC_008596.1:3276859-3277524	-1.06873	1.69e-09	9.12e-09	DOWN
4535626	MSMEG_0183	hypothetical protein	NC_008596.1:208033-208584	-1.06771	0.00104162	0.00247096	DOWN
4536536	MSMEG_0330	LuxR family transcriptional regulator	NC_008596.1:365798-366985	-1.06687	0.00225118	0.00501292	DOWN
4533722	MSMEG_0268	GntR family transcriptional regulator	NC_008596.1:302495-303274	-1.06478	1.69e-08	8.12e-08	DOWN
4531719	MSMEG_0870	oxidoreductase	NC_008596.1:956321-958486	-1.06399	7.21e-06	2.46e-05	DOWN
4533269	MSMEG_1097	glycosyl transferase family protein	NC_008596.1:1160901-1161584	-1.06356	2.16e-07	9.02e-07	DOWN
4534357	MSMEG_6141	N-acyl-D-glutamate amidohydrolase	NC_008596.1:6207136-6208917	-1.06205	2.49e-11	1.58e-10	DOWN
4537288	MSMEG_2525	amino acid permease	NC_008596.1:2610917-2612377	-1.062	2.79e-05	8.61e-05	DOWN
4534085	MSMEG_4392	organophopsphate acid anhydrase	NC_008596.1:4483869-4485146	-1.06074	4.81e-06	1.69e-05	DOWN
4531643	MSMEG_6475	hypothetical protein	NC_008596.1:6539043-6539543	-1.05941	1.77e-06	6.61e-06	DOWN
4533517	MSMEG_3401	LamB/YcsF family protein	NC_008596.1:3473843-3474640	-1.05798	0.00178918	0.00405616	DOWN
4532976	MSMEG_3471	hypothetical protein	NC_008596.1:3537873-3539153	-1.05779	2.11e-08	1e-07	DOWN
4536902	MSMEG_2446	hypothetical protein	NC_008596.1:2527780-2528202	-1.0577	5.69e-08	2.56e-07	DOWN
4530892	MSMEG_3309	tryptophan synthase subunit beta	NC_008596.1:3388626-3389927	-1.05674	5.61e-11	3.49e-10	DOWN
4537273	MSMEG_2069	phosphotransferase enzyme family protein	NC_008596.1:2145832-2146821	-1.05598	5.55e-07	2.19e-06	DOWN
4531965	MSMEG_3961	transcriptional regulator	NC_008596.1:4030991-4031584	-1.05596	8.82e-10	4.92e-09	DOWN
4535241	MSMEG_5165	integral membrane protein	NC_008596.1:5266487-5266834	-1.05501	0.00285669	0.00620334	DOWN
4534464	MSMEG_0620	PE family protein	NC_008596.1:701225-701518	-1.05461	2.14e-05	6.74e-05	DOWN
4536266	MSMEG_4553	GAF domain-containing protein	NC_008596.1:4645741-4646238	-1.05394	6.4e-09	3.23e-08	DOWN
4530893	MSMEG_2124	glycerol uptake facilitator, MIP channel	NC_008596.1:2201841-2202608	-1.05288	3.05e-06	1.1e-05	DOWN
4531284	MSMEG_4389	monooxygenase, NtaA/SnaA/SoxA family protein	NC_008596.1:4481050-4482420	-1.052	0.000423243	0.00107913	DOWN
4532298	MSMEG_4606	hypothetical protein	NC_008596.1:4692803-4693741	-1.05151	5.02e-05	0.000149664	DOWN
4535254	MSMEG_4969	two-component system response regulator	NC_008596.1:5066403-5067047	-1.05128	9.76e-06	3.25e-05	DOWN
4534370	MSMEG_0146	mosc domain-containing protein	NC_008596.1:168543-169361	-1.04791	1.03e-10	6.31e-10	DOWN
4537168	MSMEG_3705	major facilitator superfamily protein	NC_008596.1:3768650-3769939	-1.04722	4.99e-08	2.26e-07	DOWN
4533302	MSMEG_0635	hypothetical protein	NC_008596.1:716288-716914	-1.04692	1.67e-09	9.01e-09	DOWN
4535132	MSMEG_5247	PhoH family protein	NC_008596.1:5338763-5340076	-1.04628	2.8e-11	1.77e-10	DOWN
4536834	MSMEG_0584	hypothetical protein	NC_008596.1:660999-662471	-1.04501	4.09e-11	2.58e-10	DOWN
4531843	MSMEG_2922	hypothetical protein	NC_008596.1:2985445-2986239	-1.04412	0.000296421	0.000774189	DOWN
4533333	MSMEG_2868	PadR family transcriptional regulator	NC_008596.1:2929813-2930508	-1.044	9.64e-09	4.75e-08	DOWN
4532883	MSMEG_5430	retinol dehydrogenase 13	NC_008596.1:5513126-5513998	-1.04318	3.71e-08	1.71e-07	DOWN
4533927	MSMEG_1797	salicylate esterase	NC_008596.1:1877075-1877791	-1.04295	0.0236956	0.0423742	DOWN
4534452	MSMEG_2066	hypothetical protein	NC_008596.1:2144378-2144779	-1.04293	0.00594276	0.0121307	DOWN
4532965	MSMEG_3726	alcohol dehydrogenase	NC_008596.1:3792319-3794004	-1.04199	0.000142103	0.000393894	DOWN
4533500	MSMEG_5112	hypothetical protein	NC_008596.1:5212470-5212793	-1.04128	5.16e-05	0.000153545	DOWN
4531295	MSMEG_5297	oxalyl-CoA decarboxylase	NC_008596.1:5386954-5388684	-1.04104	2.7e-06	9.78e-06	DOWN
4536762	pstB	phosphate ABC transporter ATP-binding protein	NC_008596.1:5851717-5852493	-1.04016	3.03e-10	1.76e-09	DOWN
4537448	MSMEG_3674	hypothetical protein	NC_008596.1:3741065-3741475	-1.04003	2.72e-10	1.59e-09	DOWN
4536429	MSMEG_0662	putrescine transport ATP-binding protein PotG	NC_008596.1:743924-745081	-1.03967	8.88e-07	3.42e-06	DOWN
4537741	MSMEG_6440	monooxygenase, flavin-binding family protein	NC_008596.1:6505769-6507247	-1.03756	1.38e-10	8.29e-10	DOWN
4537505	MSMEG_0523	DNA-binding protein	NC_008596.1:602113-603006	-1.0367	1.11e-05	3.66e-05	DOWN
4535776	MSMEG_0891	polyphosphate kinase	NC_008596.1:976256-977107	-1.0367	4e-05	0.000120972	DOWN
4534100	MSMEG_0335	enoyl-CoA hydratase/isomerase	NC_008596.1:372885-373643	-1.0367	0.00407866	0.00860388	DOWN
4533663	MSMEG_5170	pyridoxamine 5'-phosphate oxidase	NC_008596.1:5271288-5271731	-1.0366	1.87e-09	1e-08	DOWN
4535516	MSMEG_4609	LysR family transcriptional regulator	NC_008596.1:4694274-4695215	-1.03568	6.86e-06	2.35e-05	DOWN
4534115	MSMEG_0345	hypothetical protein	NC_008596.1:382881-383699	-1.03557	0.00047544	0.00120116	DOWN
4535879	corA	magnesium and cobalt transporter CorA	NC_008596.1:5157213-5158280	-1.0355	4.04e-08	1.86e-07	DOWN
4530939	MSMEG_6044	ligand-binding /sugar binding domain-containing protein	NC_008596.1:6111320-6112420	-1.03547	1.7e-10	1.01e-09	DOWN
4534612	MSMEG_6570	integral membrane protein	NC_008596.1:6624209-6625588	-1.03542	1.35e-08	6.54e-08	DOWN
4537662	MSMEG_2925	permease membrane component	NC_008596.1:2988115-2988897	-1.03515	1.26e-08	6.15e-08	DOWN
4536699	MSMEG_3671	integral membrane protein	NC_008596.1:3737317-3738537	-1.03478	6.45e-10	3.64e-09	DOWN
4531314	MSMEG_1810	hypothetical protein	NC_008596.1:1887074-1887283	-1.03147	0.00104643	0.00248149	DOWN
4533188	pabB	aminodeoxychorismate synthase component I	NC_008596.1:5529526-5530779	-1.03146	1.39e-08	6.75e-08	DOWN
4536946	MSMEG_3493	hypothetical protein	NC_008596.1:3557926-3558267	-1.03035	2.07e-10	1.23e-09	DOWN
4531658	selB	selenocysteine-specific translation elongation factor	NC_008596.1:1925424-1927136	-1.03026	8.93e-10	4.98e-09	DOWN
4536077	MSMEG_3675	metal-dependent hydrolase	NC_008596.1:3741641-3742540	-1.02915	4.13e-08	1.89e-07	DOWN
4534458	MSMEG_4551	monoxygenase	NC_008596.1:4642947-4644329	-1.02703	0.0128802	0.0244893	DOWN
4532337	MSMEG_1452	sulfatase-modifying factor 1	NC_008596.1:1548624-1549514	-1.02535	1.88e-06	6.96e-06	DOWN
4536056	MSMEG_0535	GntR family transcriptional regulator	NC_008596.1:615801-616439	-1.02527	3.6e-07	1.46e-06	DOWN
4531636	phhB	pterin-4-alpha-carbinolamine dehydratase	NC_008596.1:5254729-5255013	-1.02416	3.09e-08	1.44e-07	DOWN
4537541	MSMEG_1563	short-chain dehydrogenase/reductase SDR	NC_008596.1:1652167-1652964	-1.0241	0.000522711	0.00130865	DOWN
4532571	MSMEG_6011	short chain dehydrogenase	NC_008596.1:6075060-6075848	-1.02384	2.75e-06	9.94e-06	DOWN
4530850	MSMEG_5030	hypothetical protein	NC_008596.1:5125244-5125693	-1.02043	1.16e-09	6.39e-09	DOWN
4536342	MSMEG_1837	hypothetical protein	NC_008596.1:1911718-1913127	-1.01965	8.67e-10	4.84e-09	DOWN
4531383	MSMEG_5251	hypothetical protein	NC_008596.1:5345057-5346574	-1.01662	1.99e-07	8.37e-07	DOWN
4537583	MSMEG_4663	protein IolB	NC_008596.1:4749139-4750014	-1.01479	2.99e-05	9.18e-05	DOWN
4537520	MSMEG_4351	oxidoreductase YjgI	NC_008596.1:4438978-4439736	-1.01407	4.07e-10	2.34e-09	DOWN
4532027	MSMEG_6292	transcription elongation factor GreA	NC_008596.1:6358172-6358645	-1.01379	2.29e-09	1.21e-08	DOWN
4534160	MSMEG_4595	serine/threonine protein kinase	NC_008596.1:4685185-4685997	-1.01193	3.78e-09	1.96e-08	DOWN
4531408	mtrA	DNA-binding response regulator MtrA	NC_008596.1:1950437-1951123	-1.01013	1.28e-10	7.75e-10	DOWN
4532414	MSMEG_2065	hypothetical protein	NC_008596.1:2143828-2144346	-1.01002	0.000638749	0.00156844	DOWN
4536208	MSMEG_5486	peptidase S1 and S6, chymotrypsin/Hap	NC_008596.1:5566507-5567841	-1.00987	2.01e-10	1.19e-09	DOWN
4535116	MSMEG_2850	cell entry (mce) related family protein	NC_008596.1:2913508-2913930	-1.00942	1.02e-08	5e-08	DOWN
4536571	MSMEG_4967	hypothetical protein	NC_008596.1:5064154-5065035	-1.00917	5.87e-10	3.34e-09	DOWN
4533935	MSMEG_5822	hypothetical protein	NC_008596.1:5885977-5887236	-1.00588	6.73e-07	2.62e-06	DOWN
4533287	MSMEG_3354	TetR family transcriptional regulator	NC_008596.1:3429446-3430054	-1.00272	5.85e-06	2.02e-05	DOWN
4533011	MSMEG_3658	hypothetical protein	NC_008596.1:3724998-3725492	-1.00171	0.00141925	0.00328931	DOWN
4534793	MSMEG_6128	two-component system response regulator	NC_008596.1:6190869-6191315	-1.00053	9e-09	4.46e-08	DOWN
4534321	MSMEG_1930	DEAD/DEAH box helicase	NC_008596.1:2007957-2009465	-1.00045	2.42e-10	1.43e-09	DOWN
4532250	MSMEG_5593	pyruvate dehydrogenase	NC_008596.1:5680074-5682029	-1.00026	1.66e-08	7.97e-08	DOWN
4533972	MSMEG_0440	hypothetical protein	NC_008596.1:515317-515415	#NAME?	0.00111659	0.00263378	DOWN
4534092	MSMEG_2674	pseudo	NC_008596.1:2753235-2753993	#NAME?	0.00426615	0.0089511	DOWN
